# Supplementary material for: Enantioselective phase-transfer catalytic α-alkylation of 2-methylbenzyl tert-butyl malonates
Source: Royal Society of Chemistry journal article supplement (doi:10.1039/c3ob40481a), 2013-01-01
Supplement: c3ob40481a.pdf [file c3ob40481a.pdf]

## Supporting Information

# Enantioselective Phase-transfer Catalytic $\alpha$ -Alkylation of 2-Methylbenzyl *tert*-Butyl Malonates

Min Woo Ha, Suckchang Hong, Cheongyoung Park, Yohan Park, Jihye Lee, Mi-hyun Kim, Jihoon Lee, and Hyeung-geun Park\*

*Research Institute of Pharmaceutical Sciences and College of Pharmacy,  
Seoul National University, Seoul 151-742, Korea,*

[hgpk@snu.ac.kr](mailto:hgpk@snu.ac.kr)

### List of Contents

|                                                      |     |
|------------------------------------------------------|-----|
| (1) $^1\text{H}$ & $^{13}\text{C}$ NMR Spectra ----- | S2  |
| (2) Chiral HPLC Chromatogram -----                   | S62 |

## (1) $^1\text{H}$ & $^{13}\text{C}$ NMR Spectra

$^1\text{H}$ -NMR of compound (15)

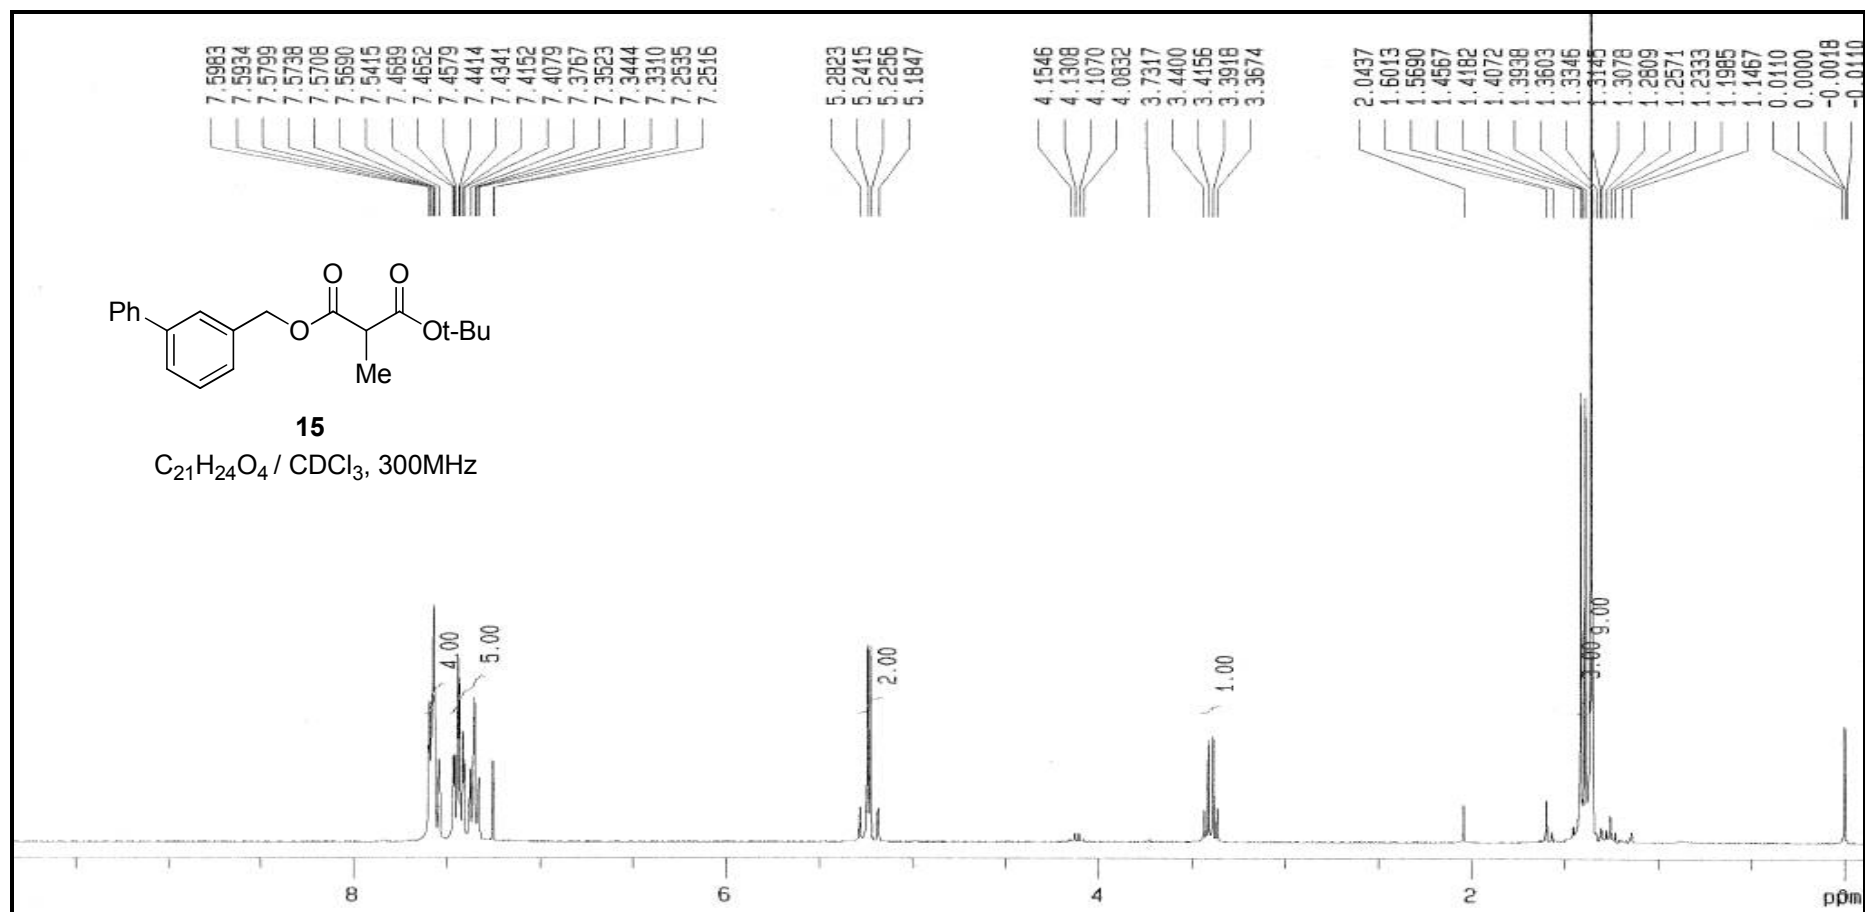

$^{13}\text{C-NMR}$  of compound (**15**)

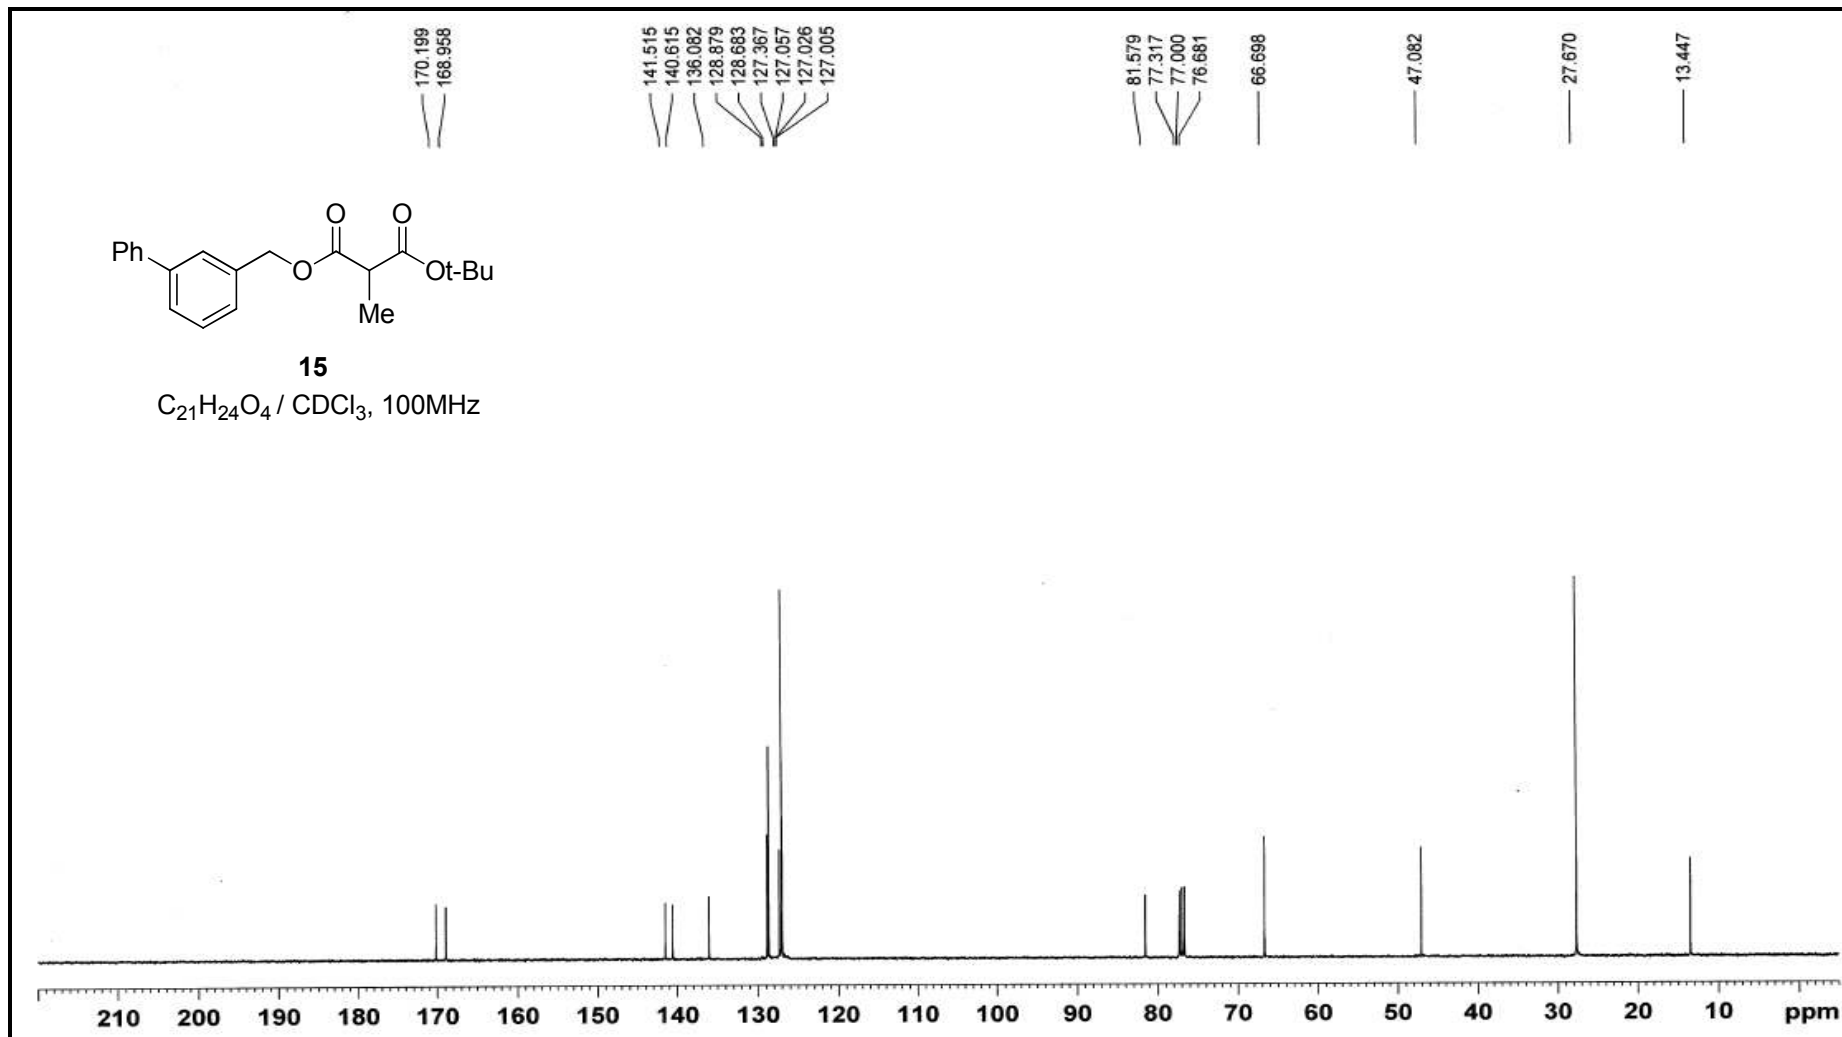

<sup>1</sup>H-NMR of compound (15c)

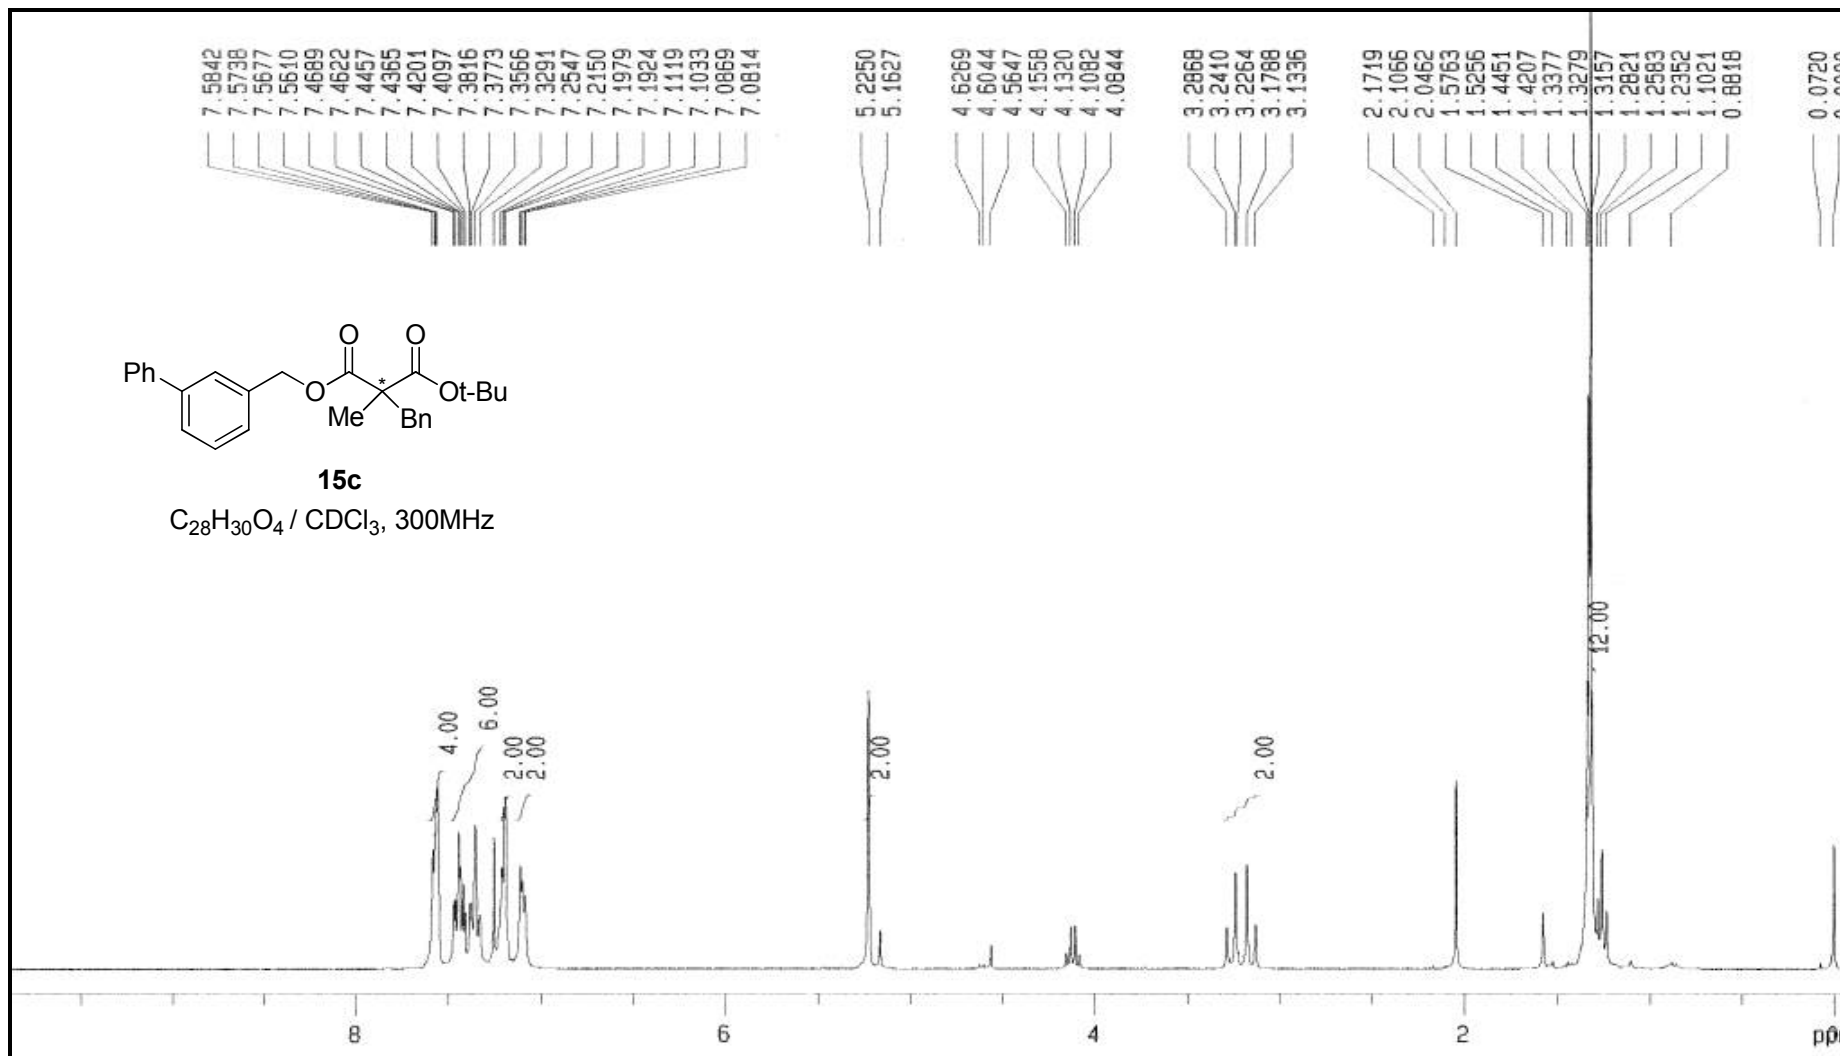

$^{13}\text{C-NMR}$  of compound (**15c**)

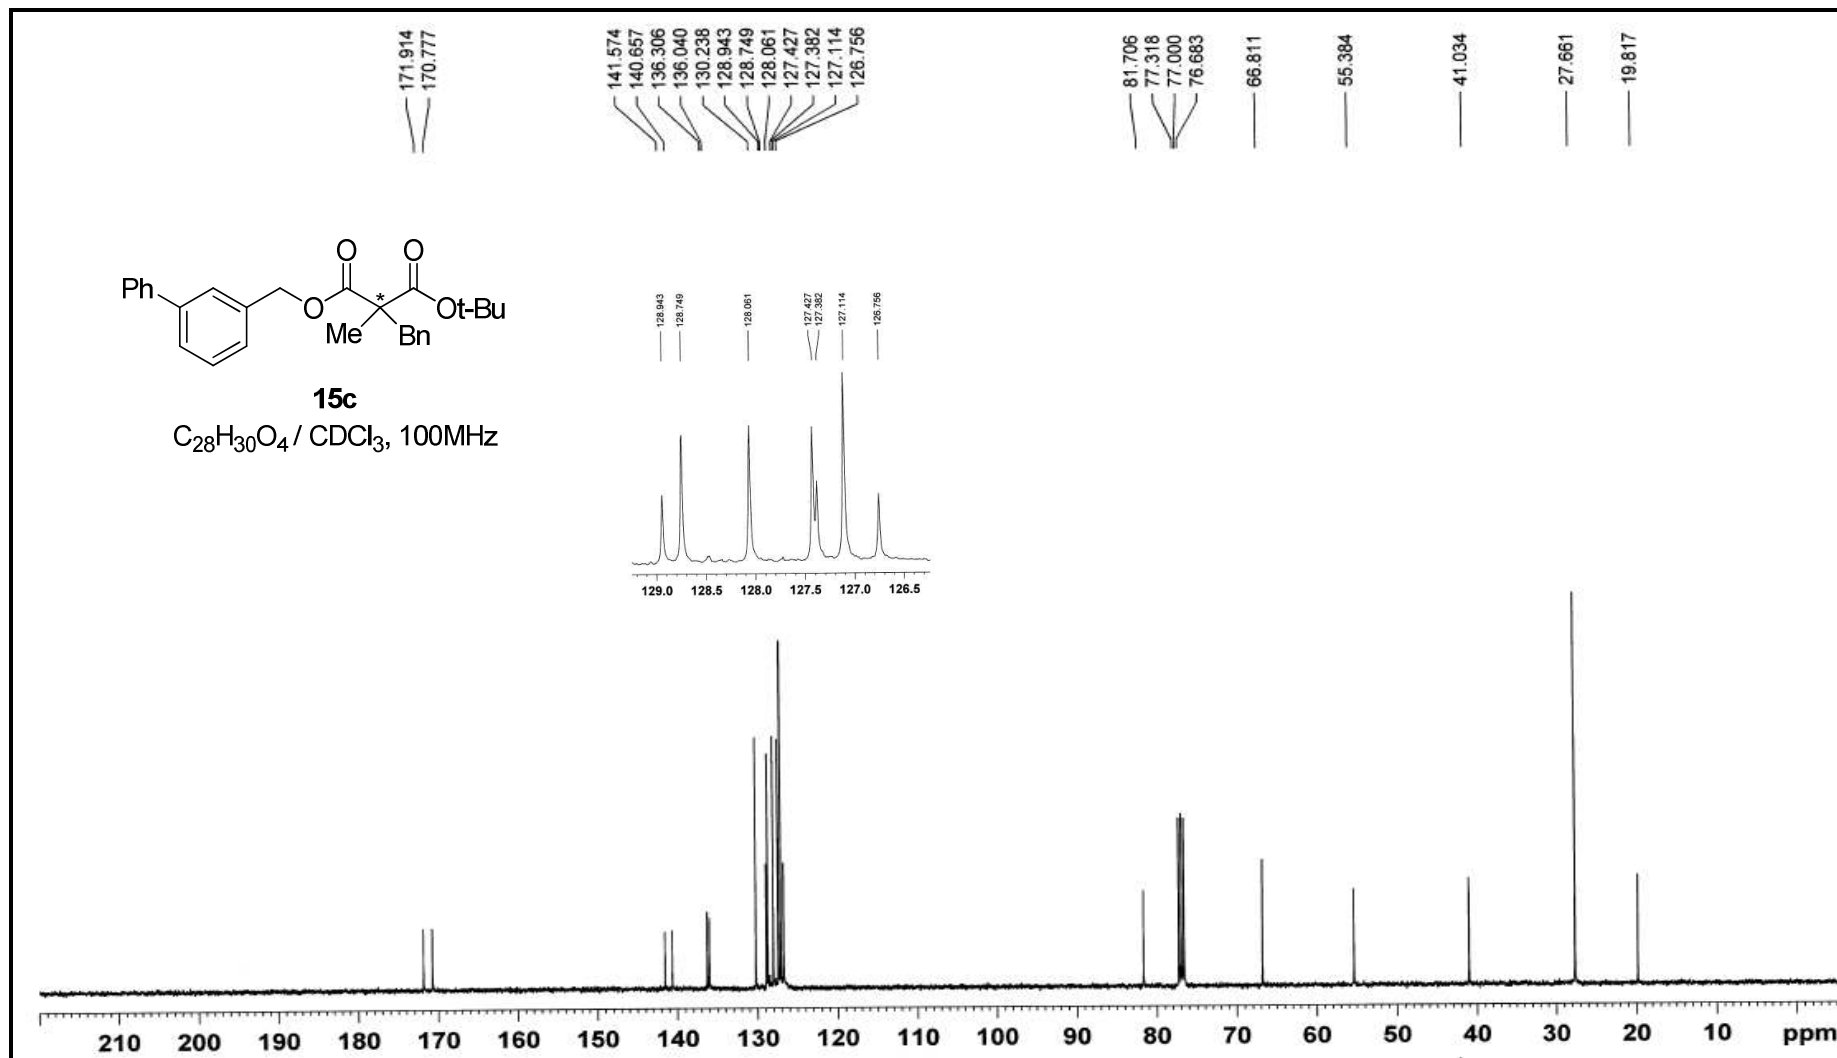

<sup>1</sup>H-NMR of compound (16)

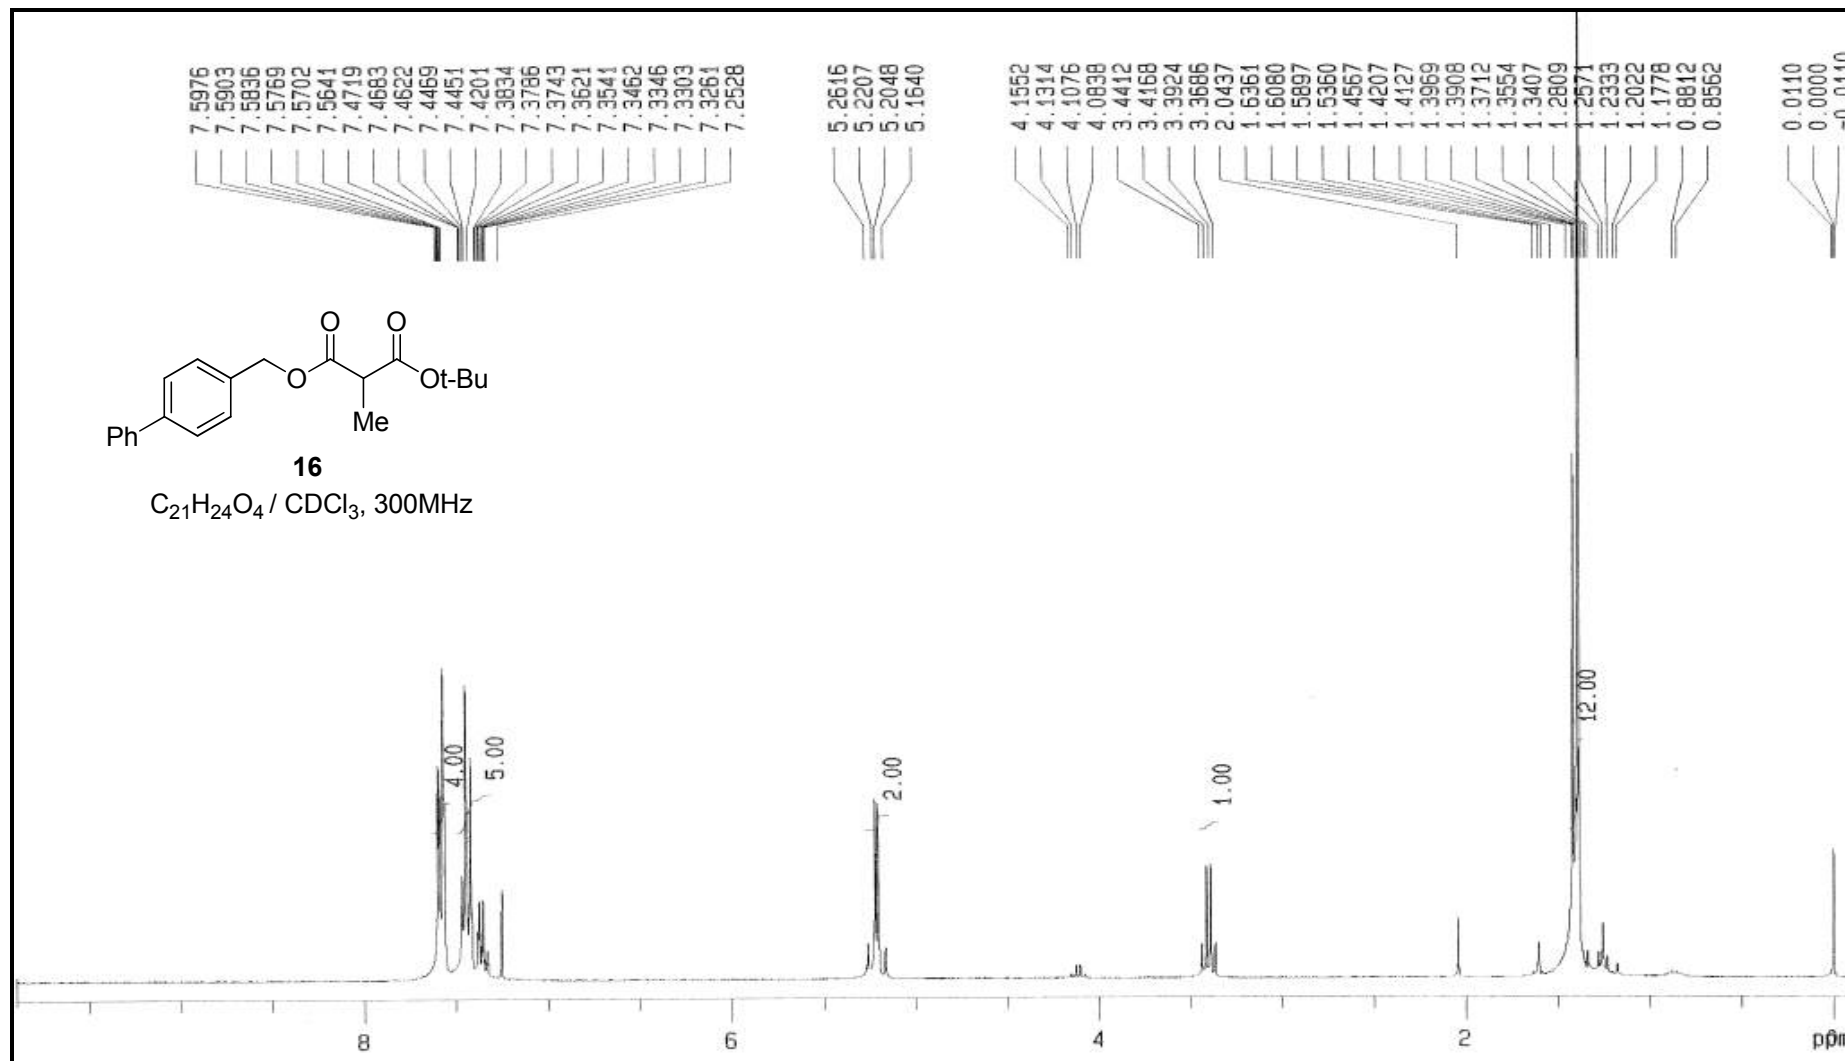

$^{13}\text{C-NMR}$  of compound (**16**)

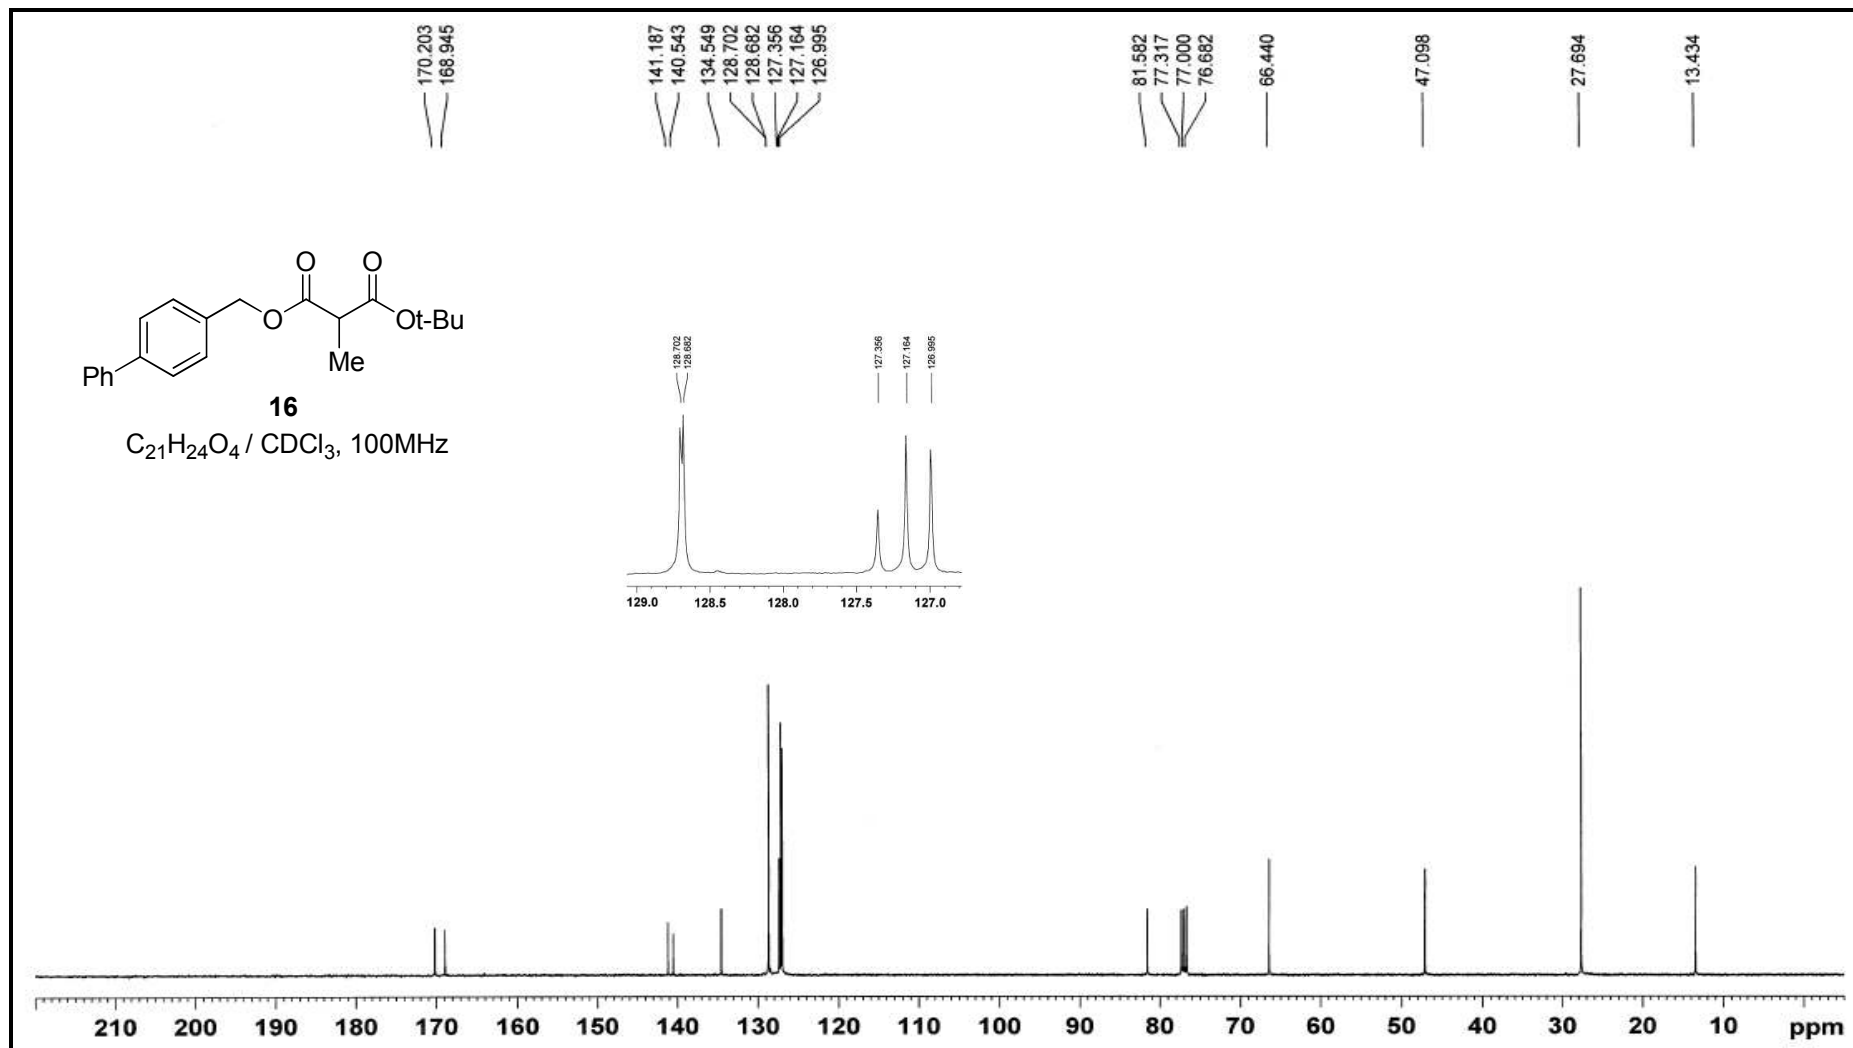

<sup>1</sup>H-NMR of compound (16c)

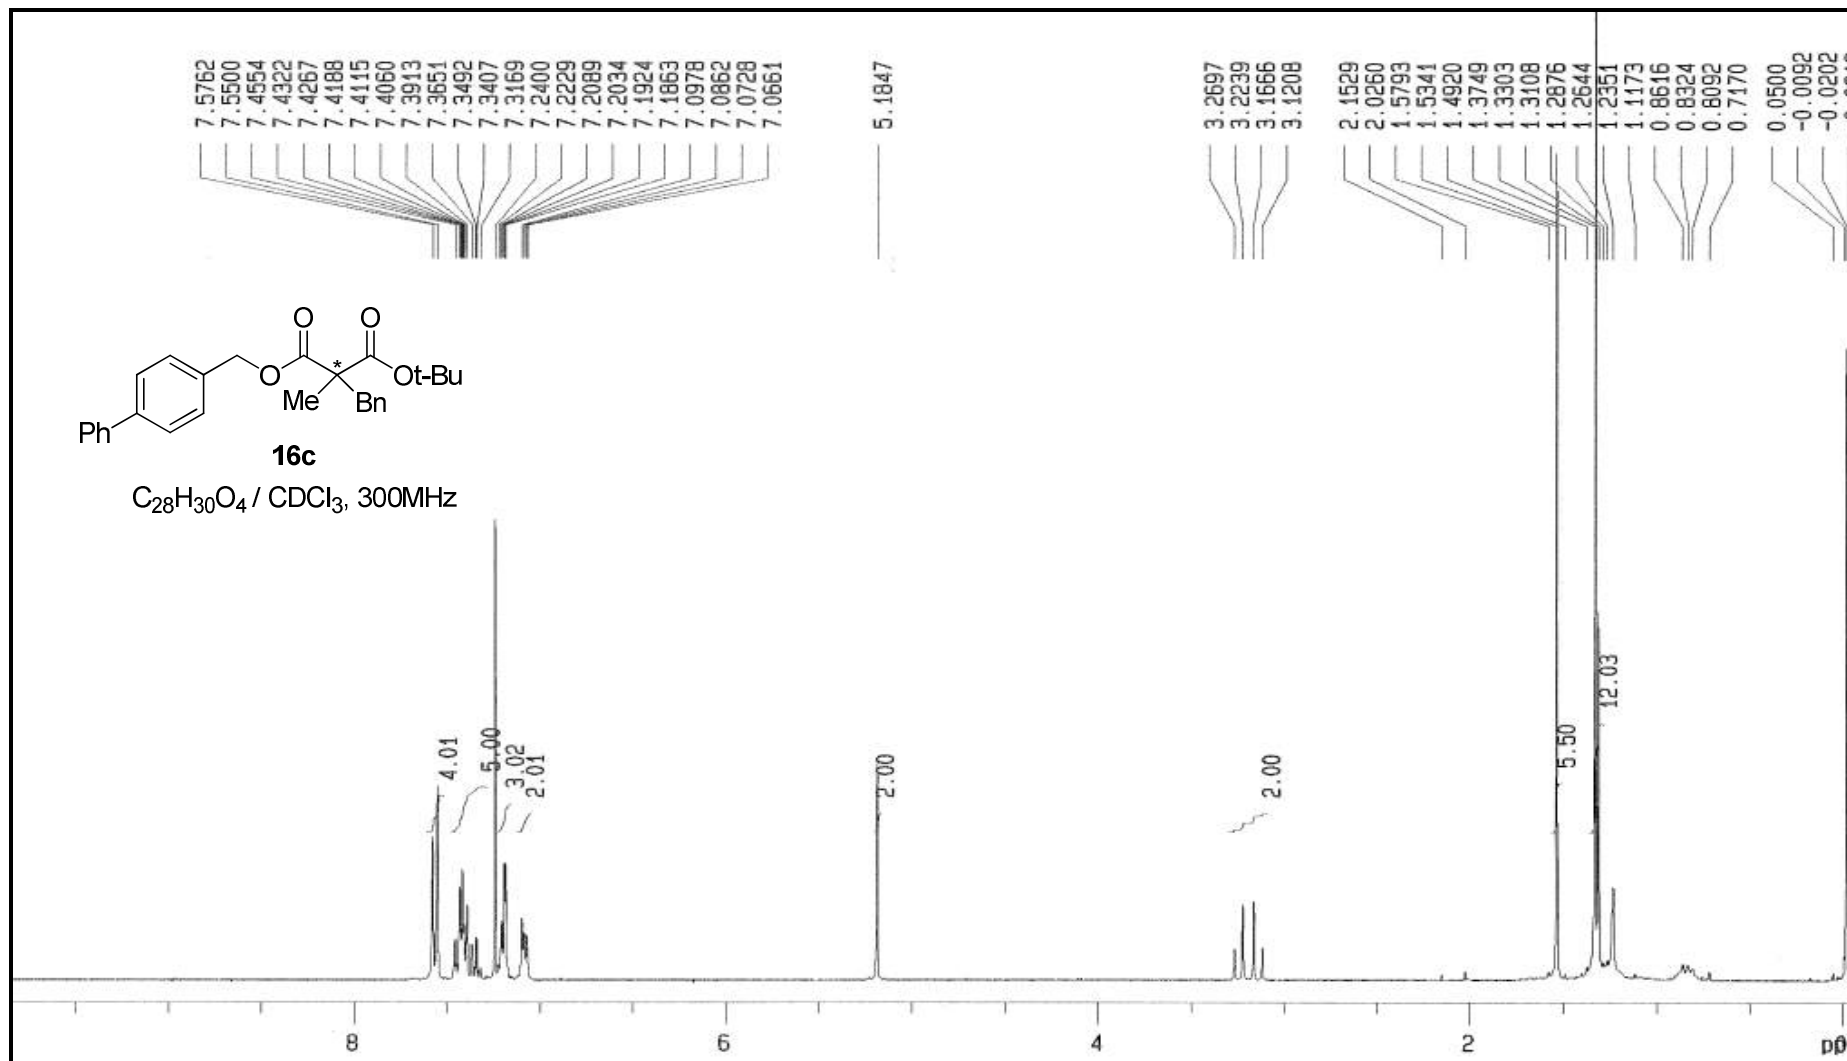



$^{13}\text{C-NMR}$  of compound (**16c**)

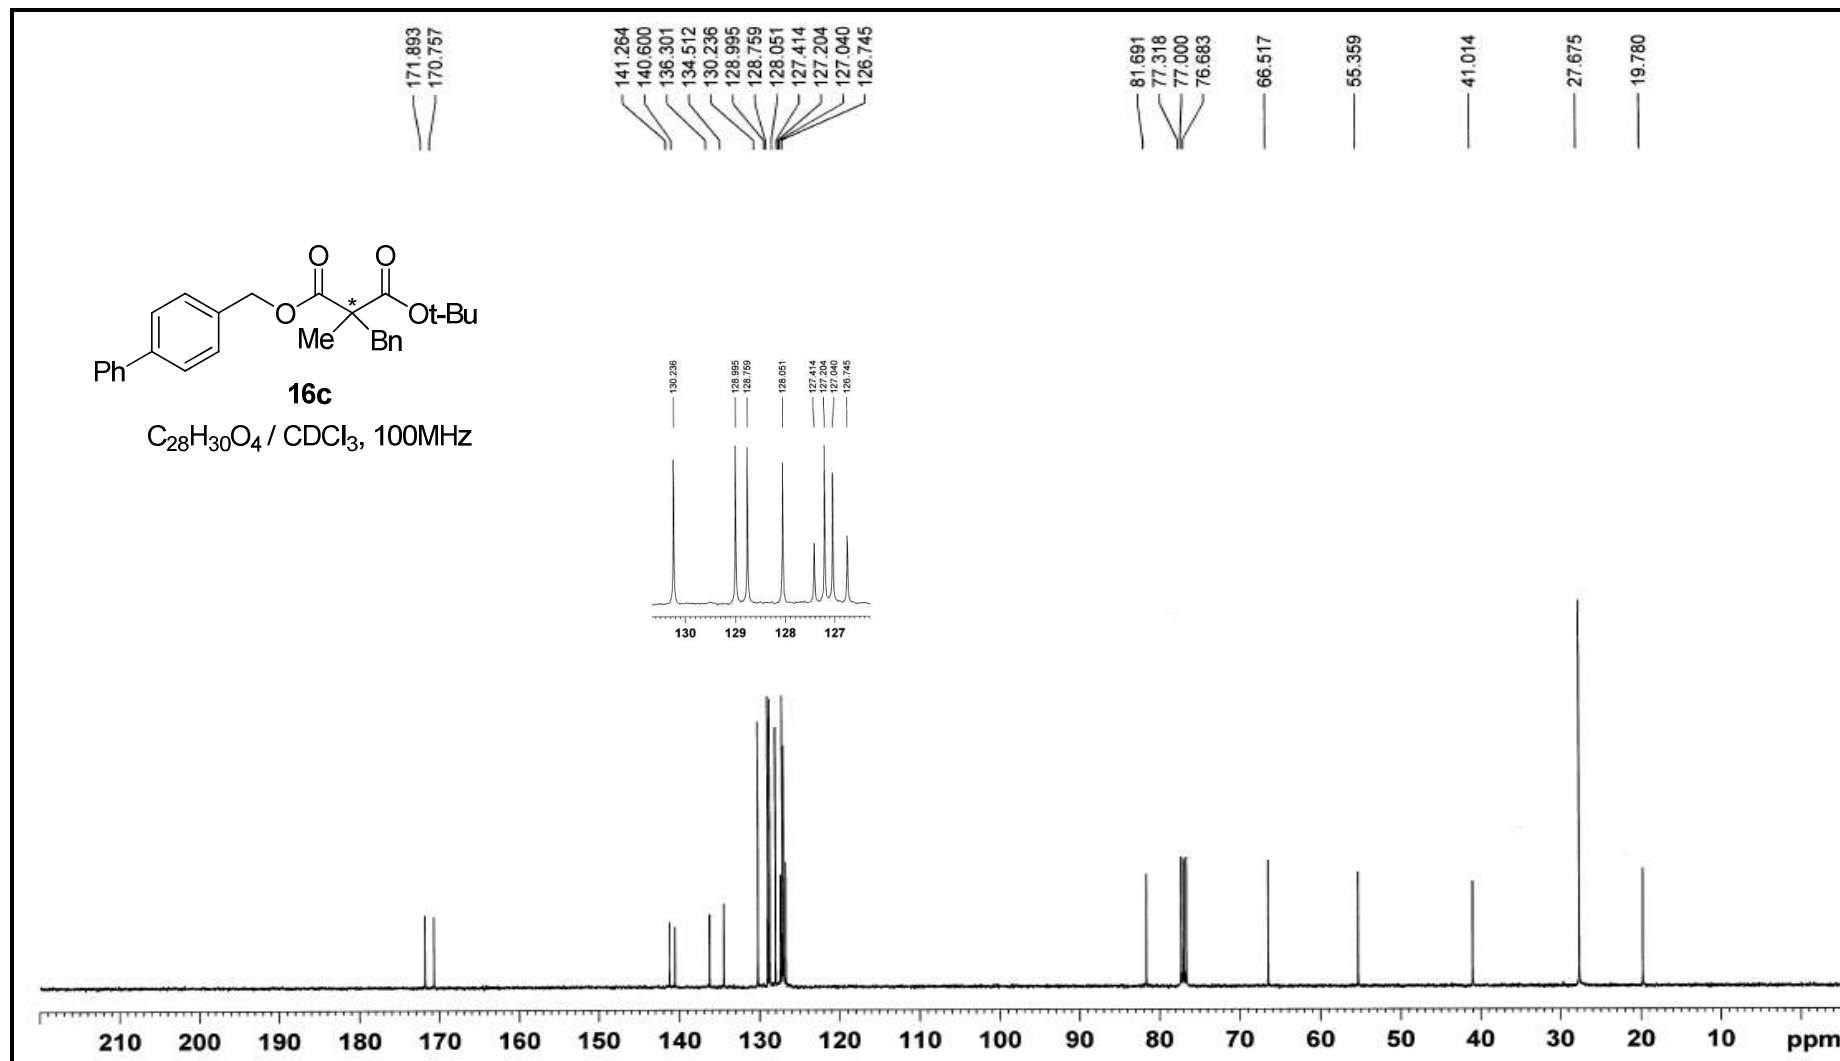

<sup>1</sup>H-NMR of compound (17)

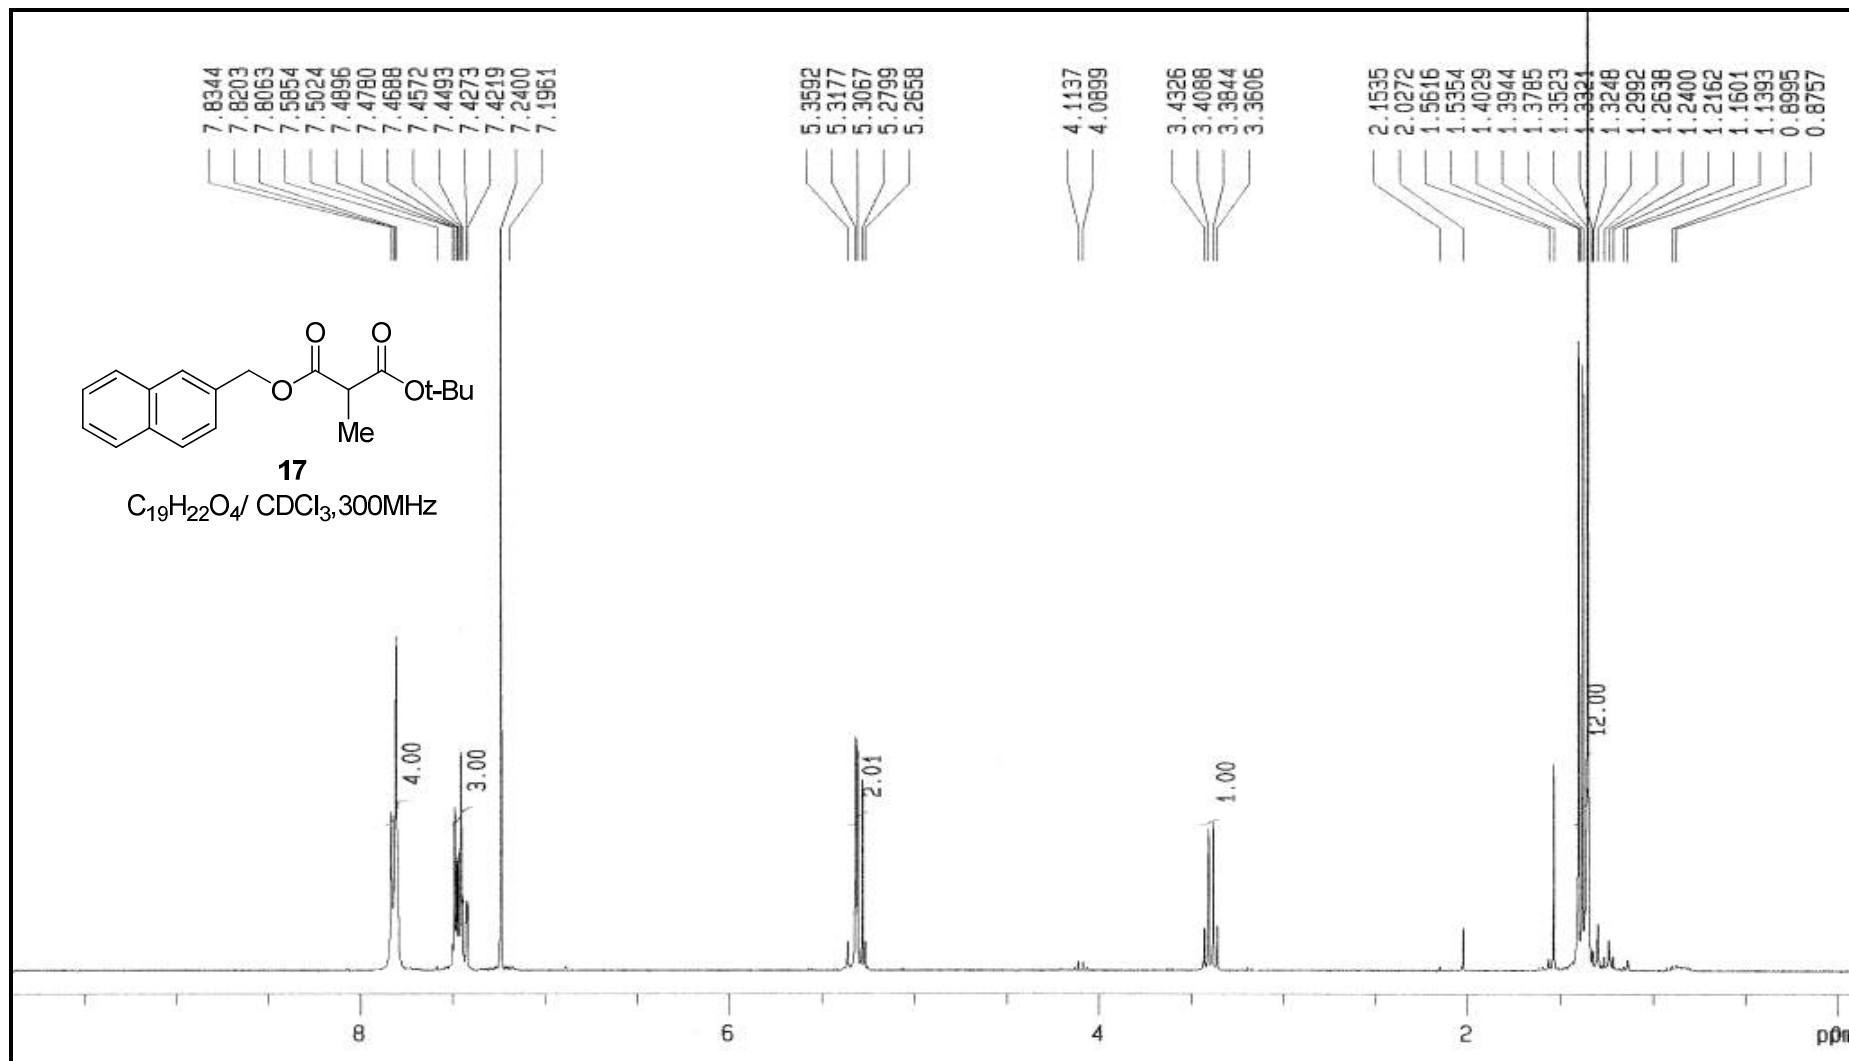



<sup>1</sup>H-NMR of compound (17c)

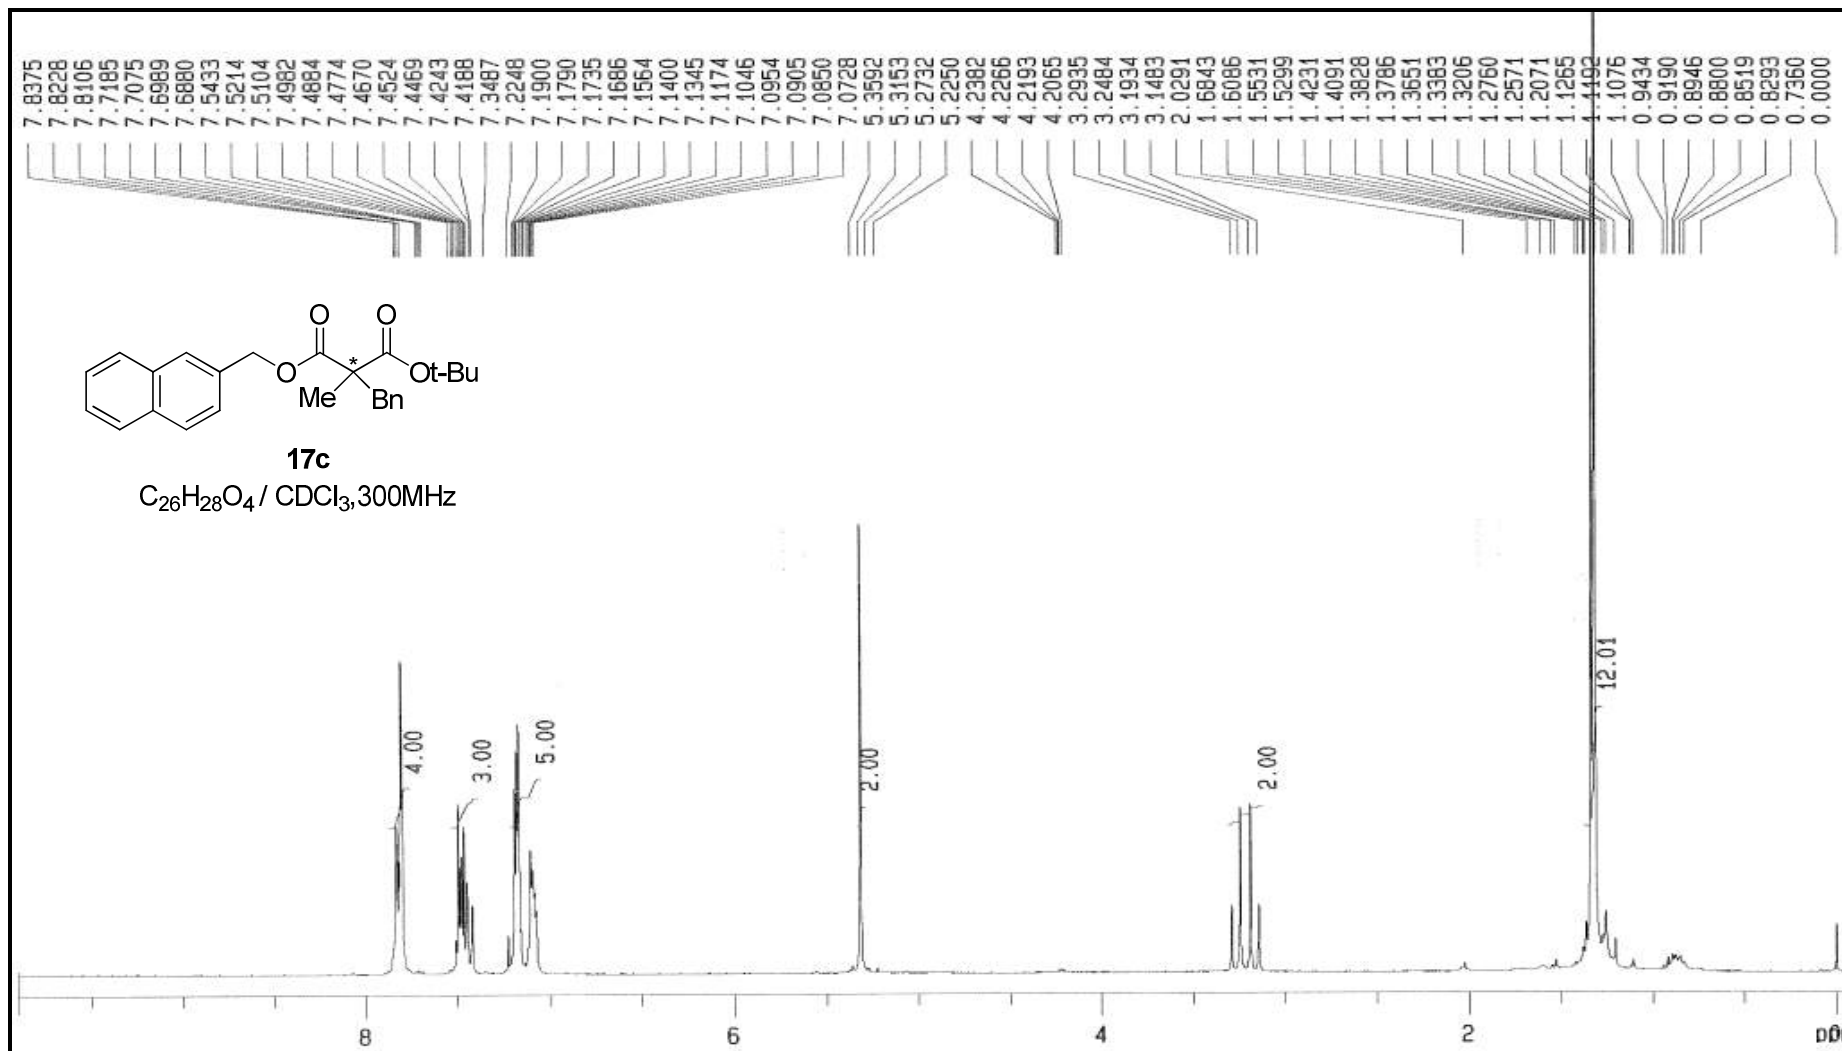

$^{13}\text{C-NMR}$  of compound (**17c**)

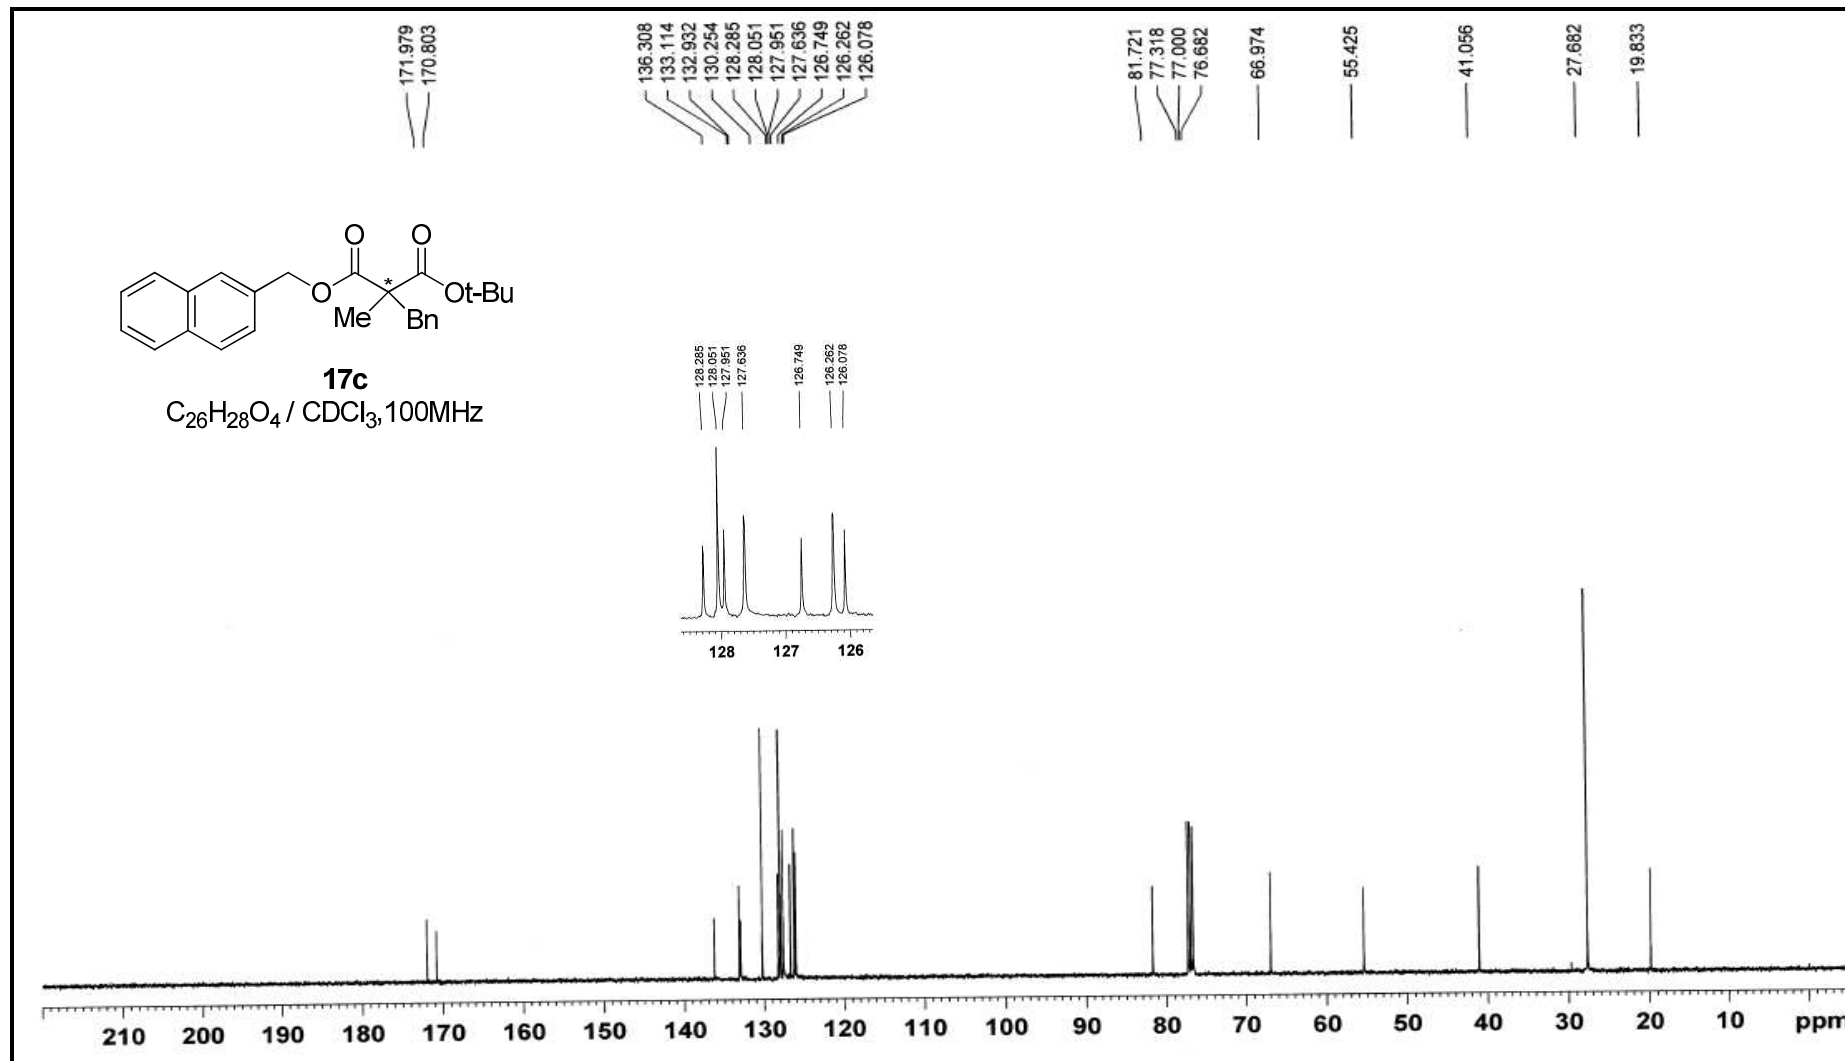

<sup>1</sup>H-NMR of compound (18)

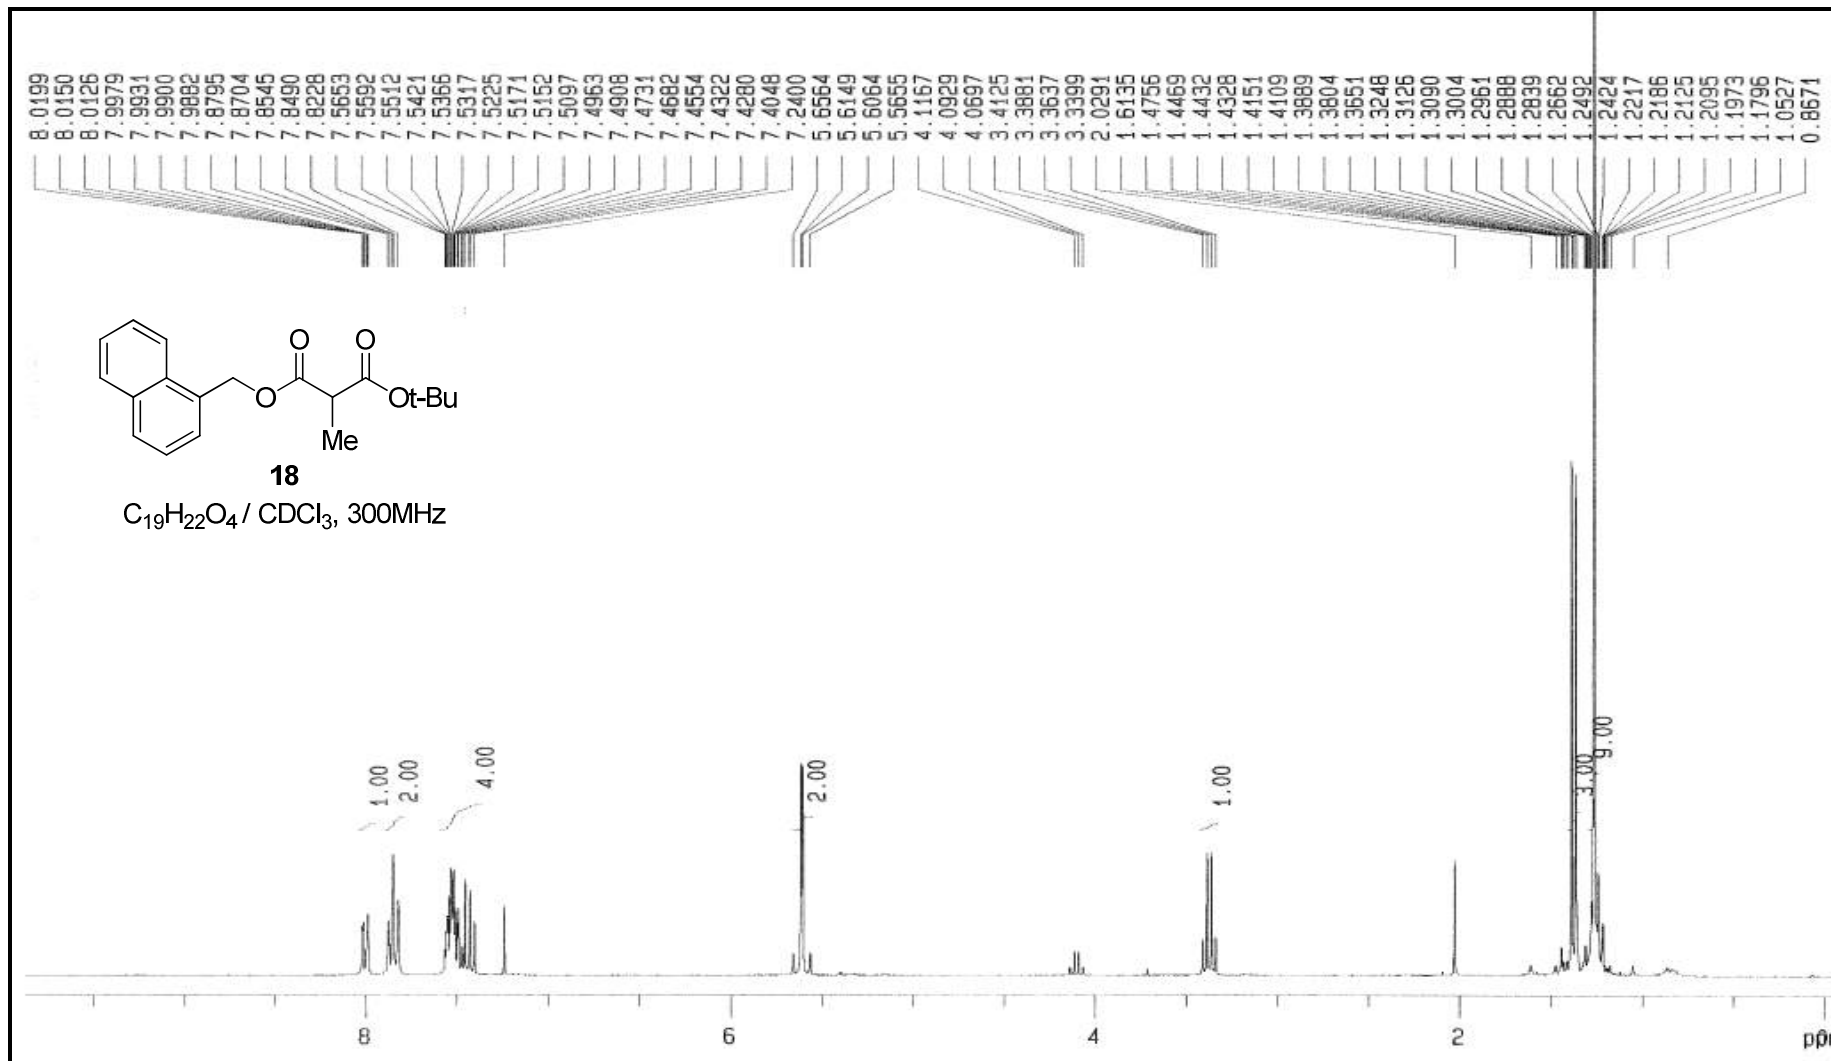

$^{13}\text{C-NMR}$  of compound (**18**)

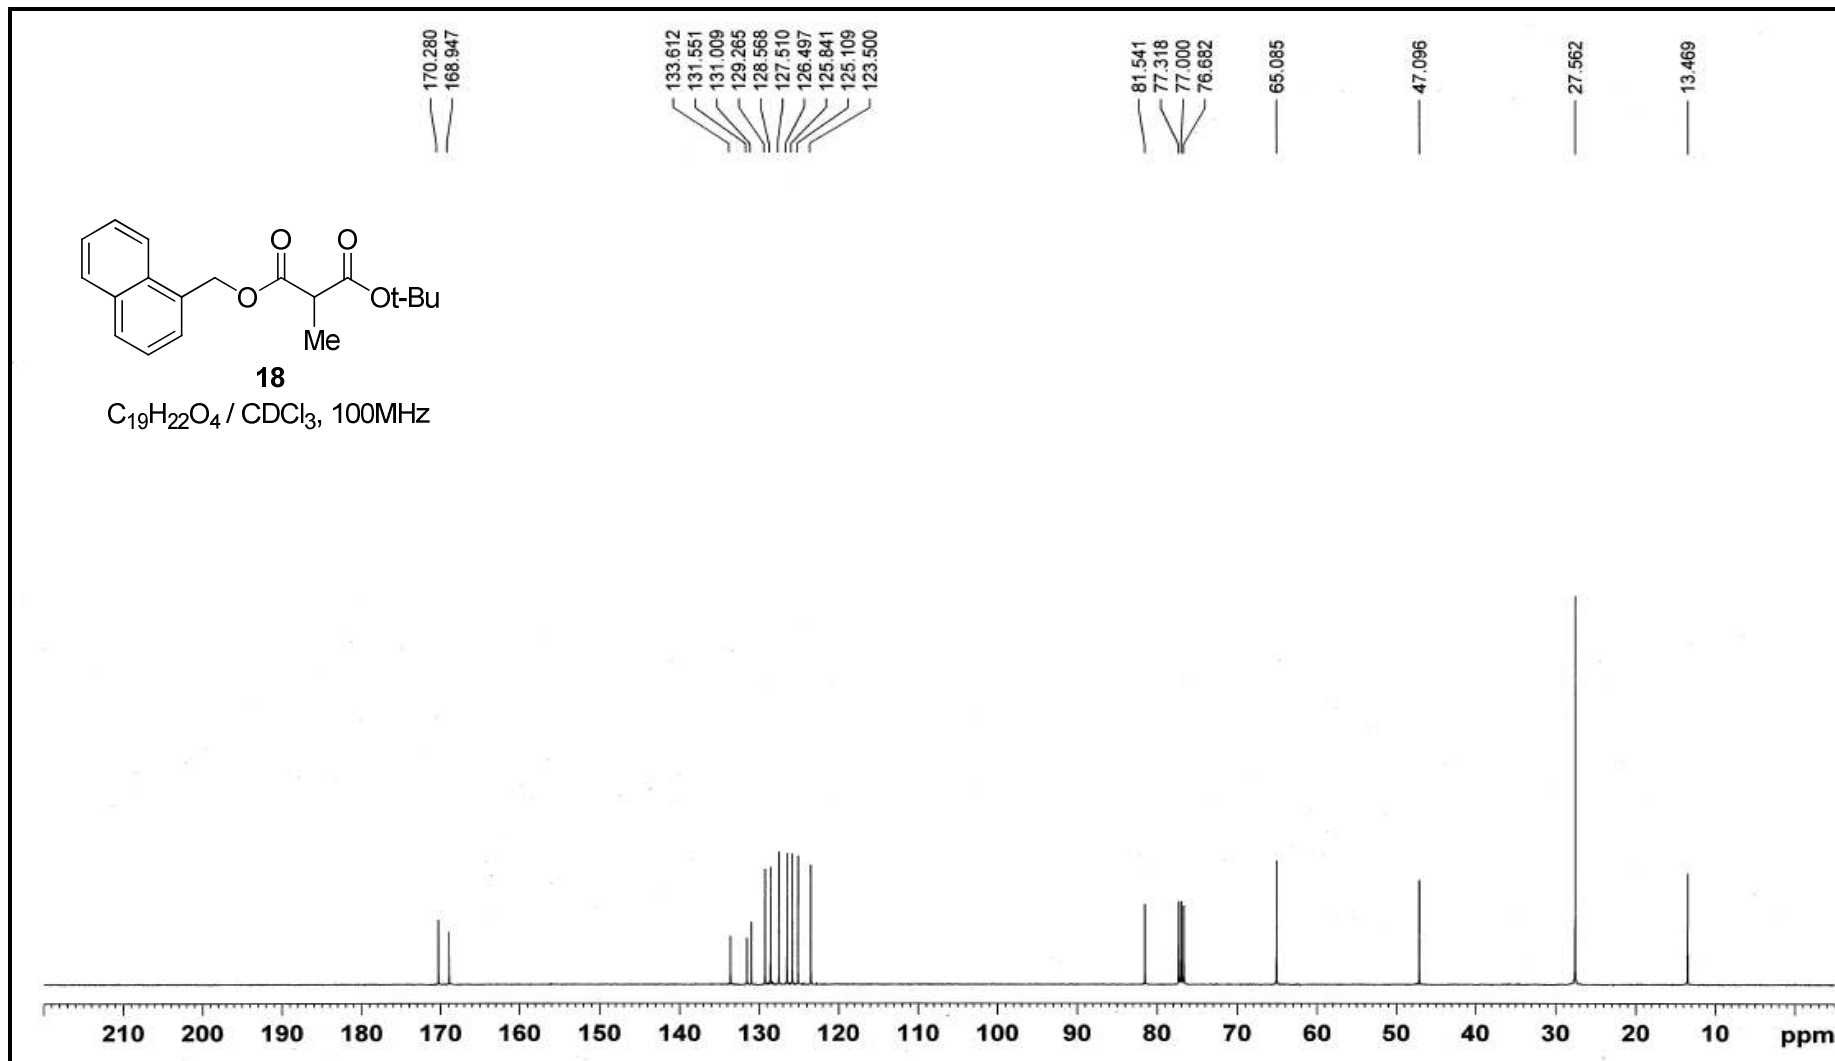

<sup>1</sup>H-NMR of compound (18c)

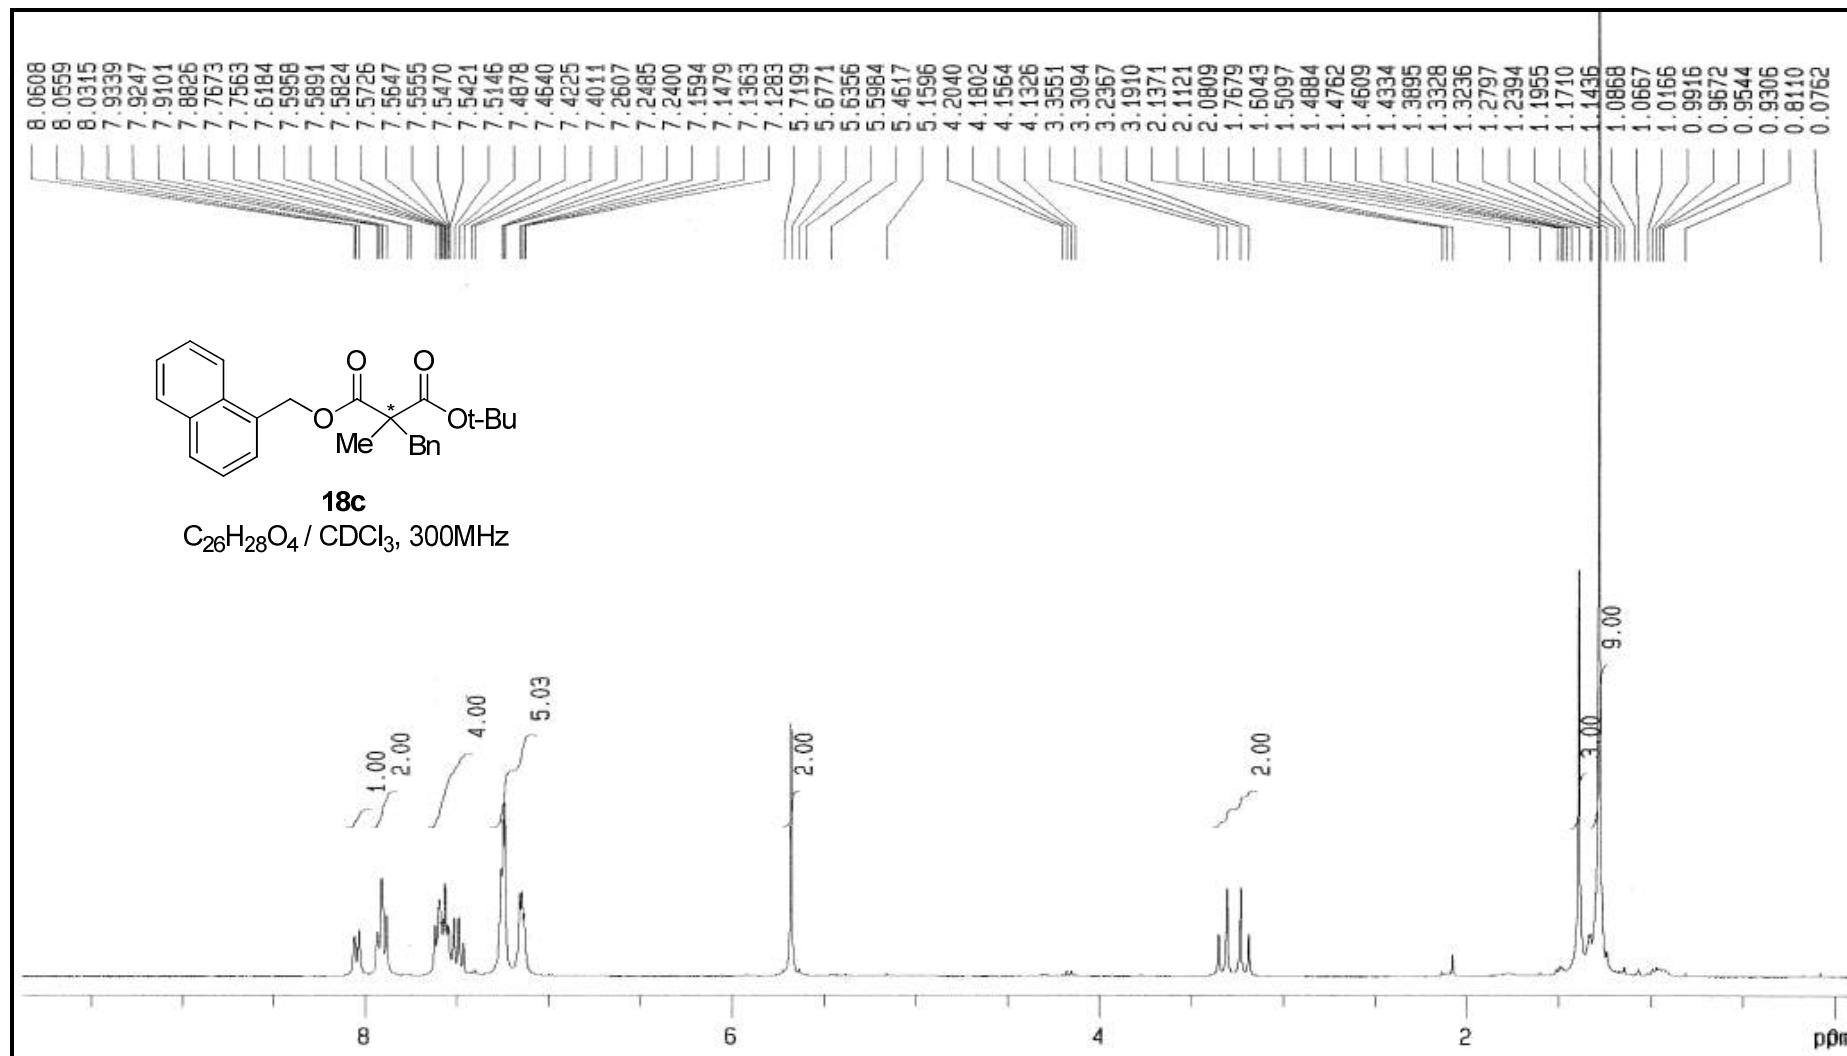



$^{13}\text{C-NMR}$  of compound (**18c**)

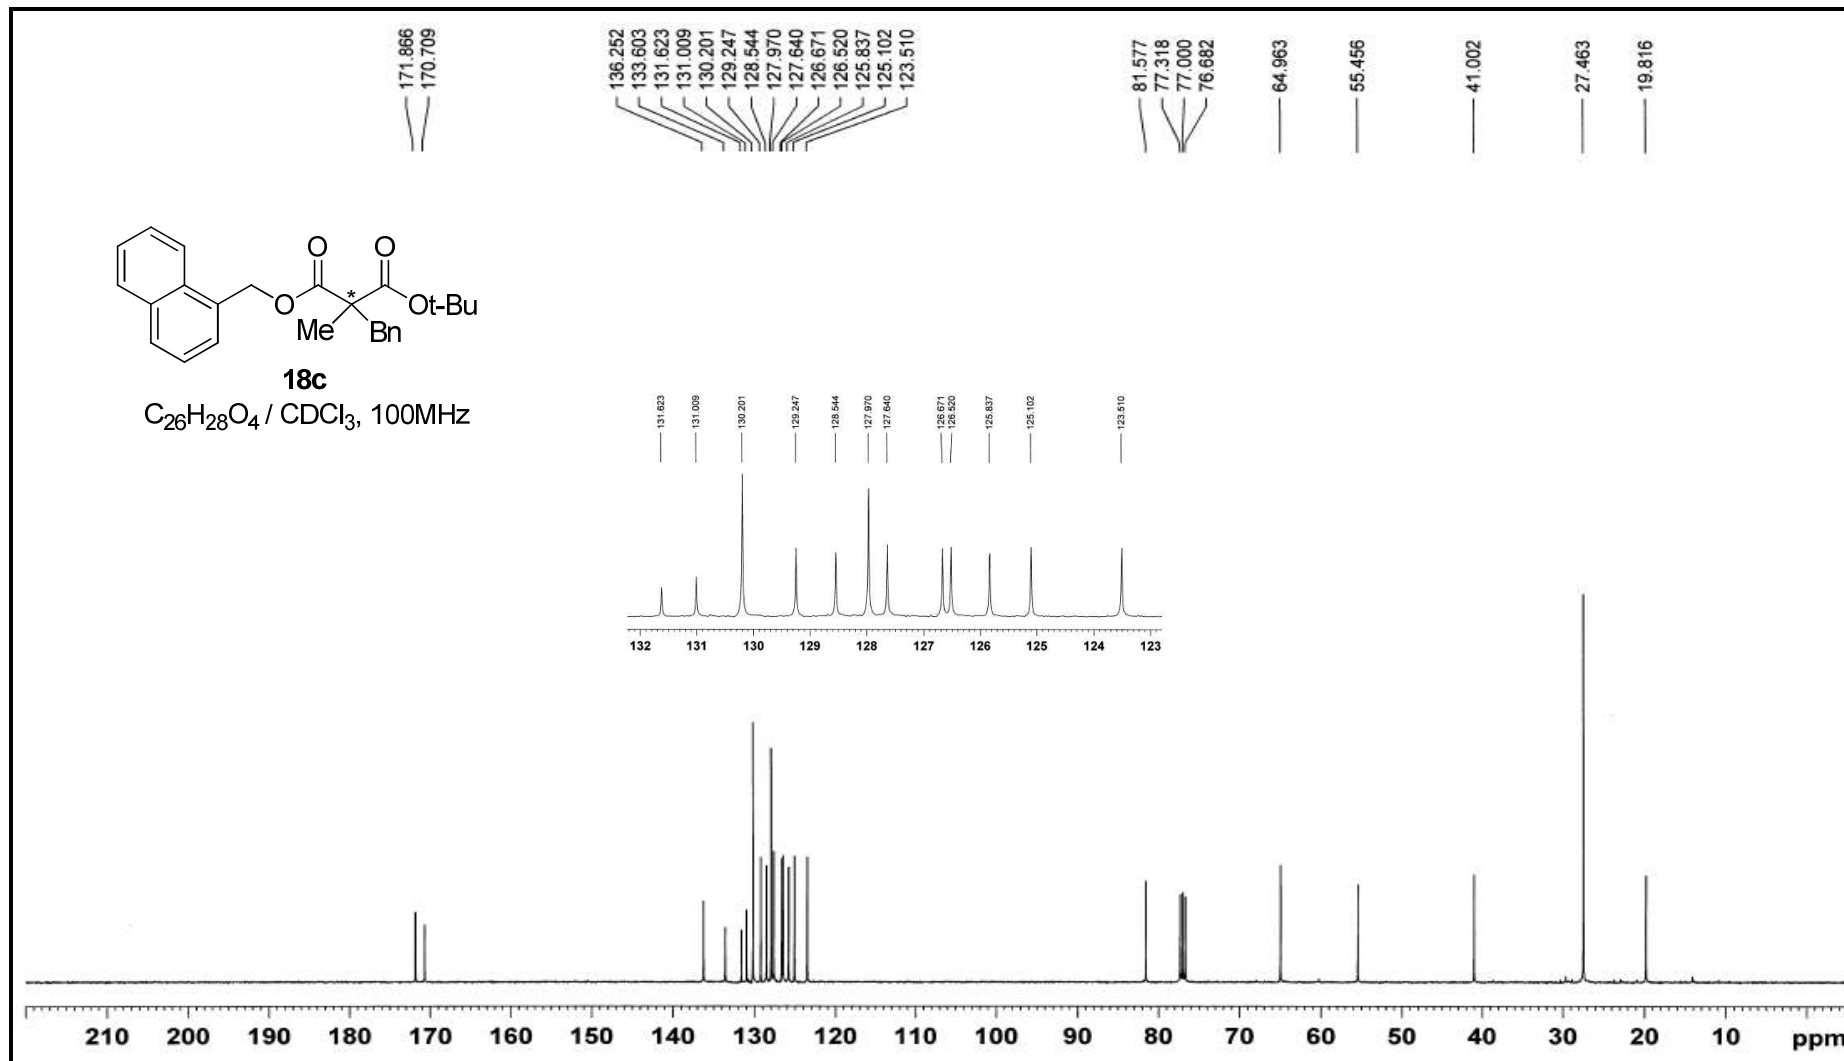

<sup>1</sup>H-NMR of compound (19)

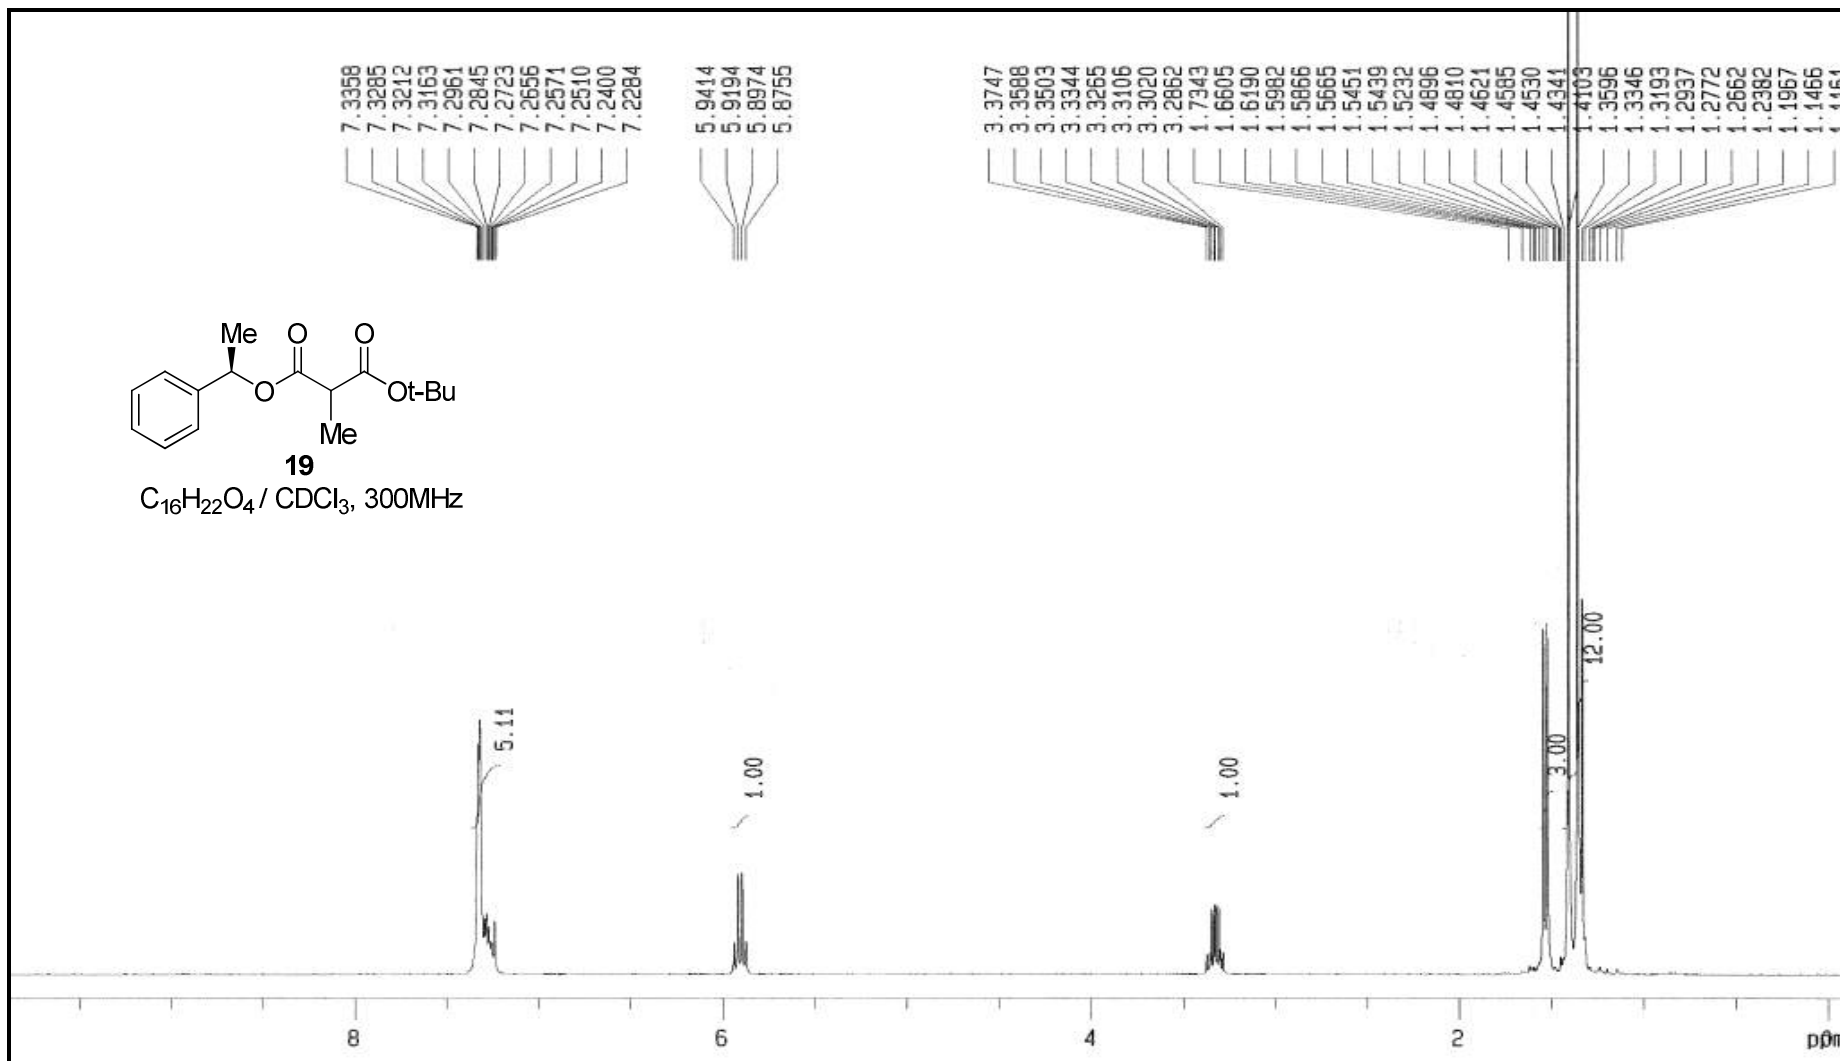

$^{13}\text{C-NMR}$  of compound (**19**)

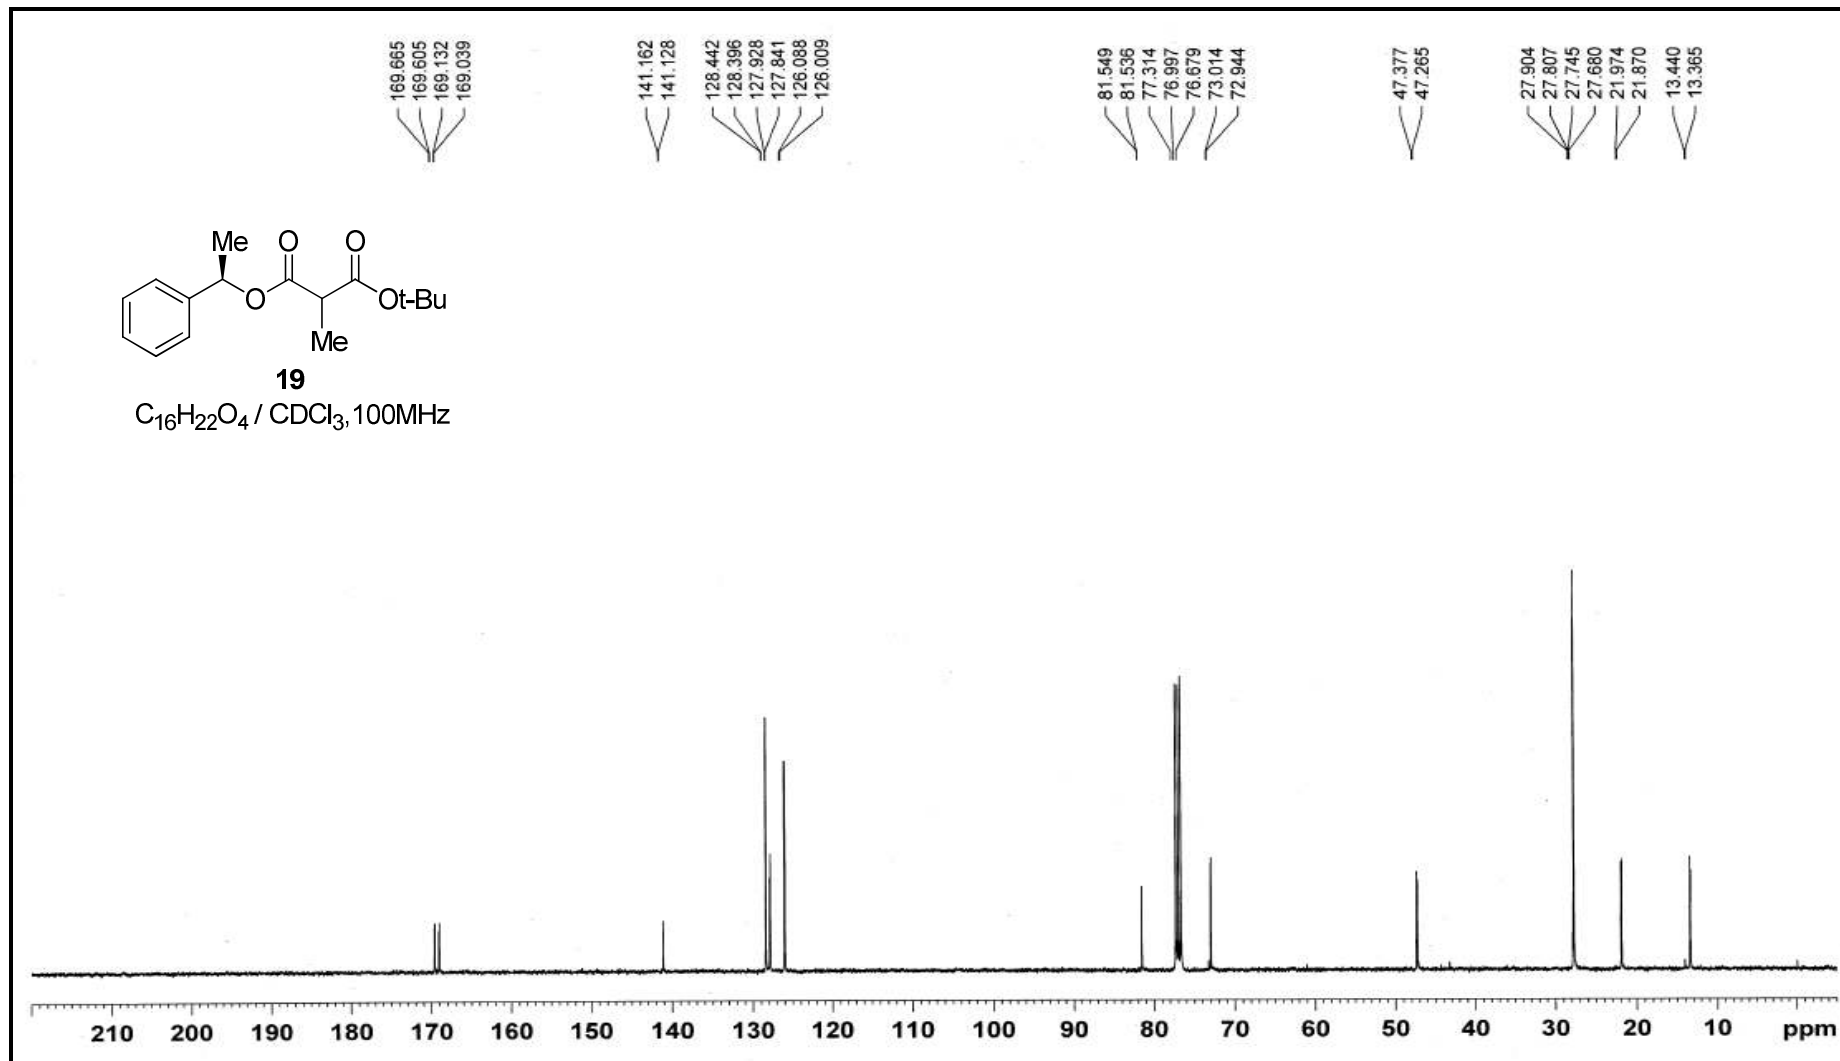

<sup>1</sup>H-NMR of compound (19a)

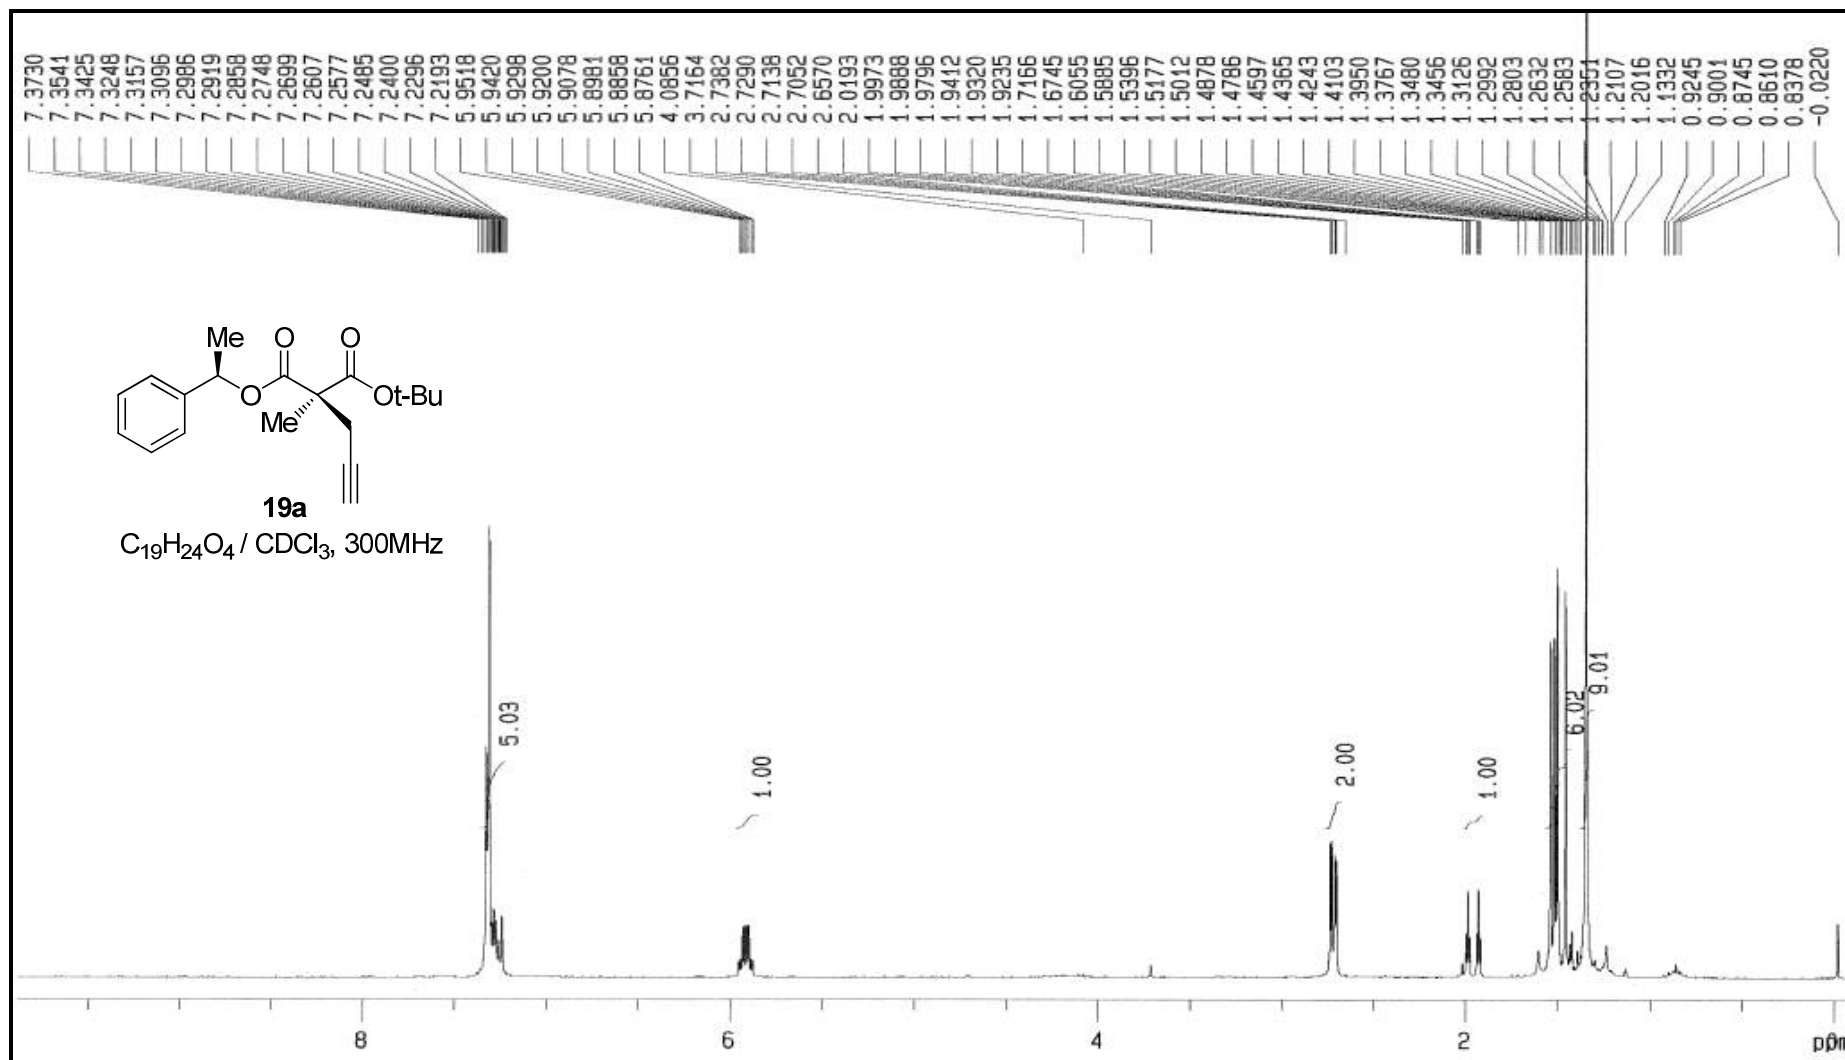

<sup>13</sup>C-NMR of compound (19a)

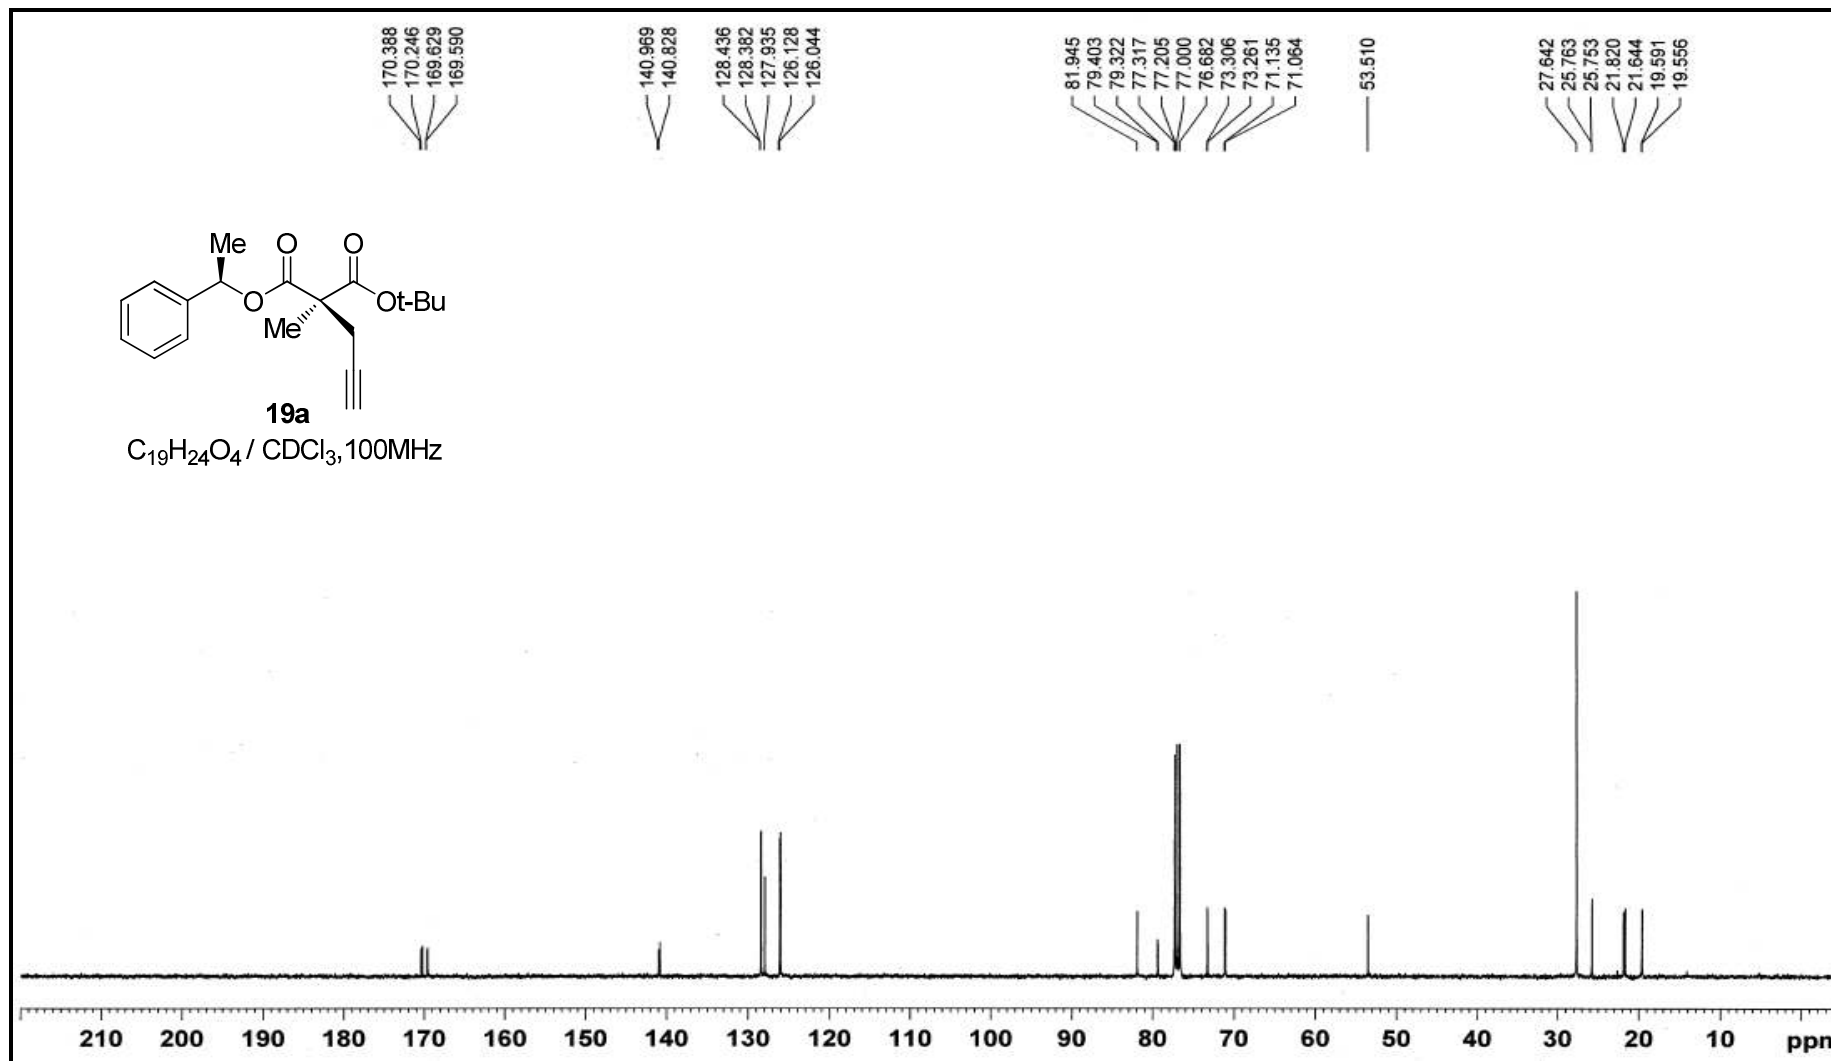

<sup>1</sup>H-NMR of compound (19b)

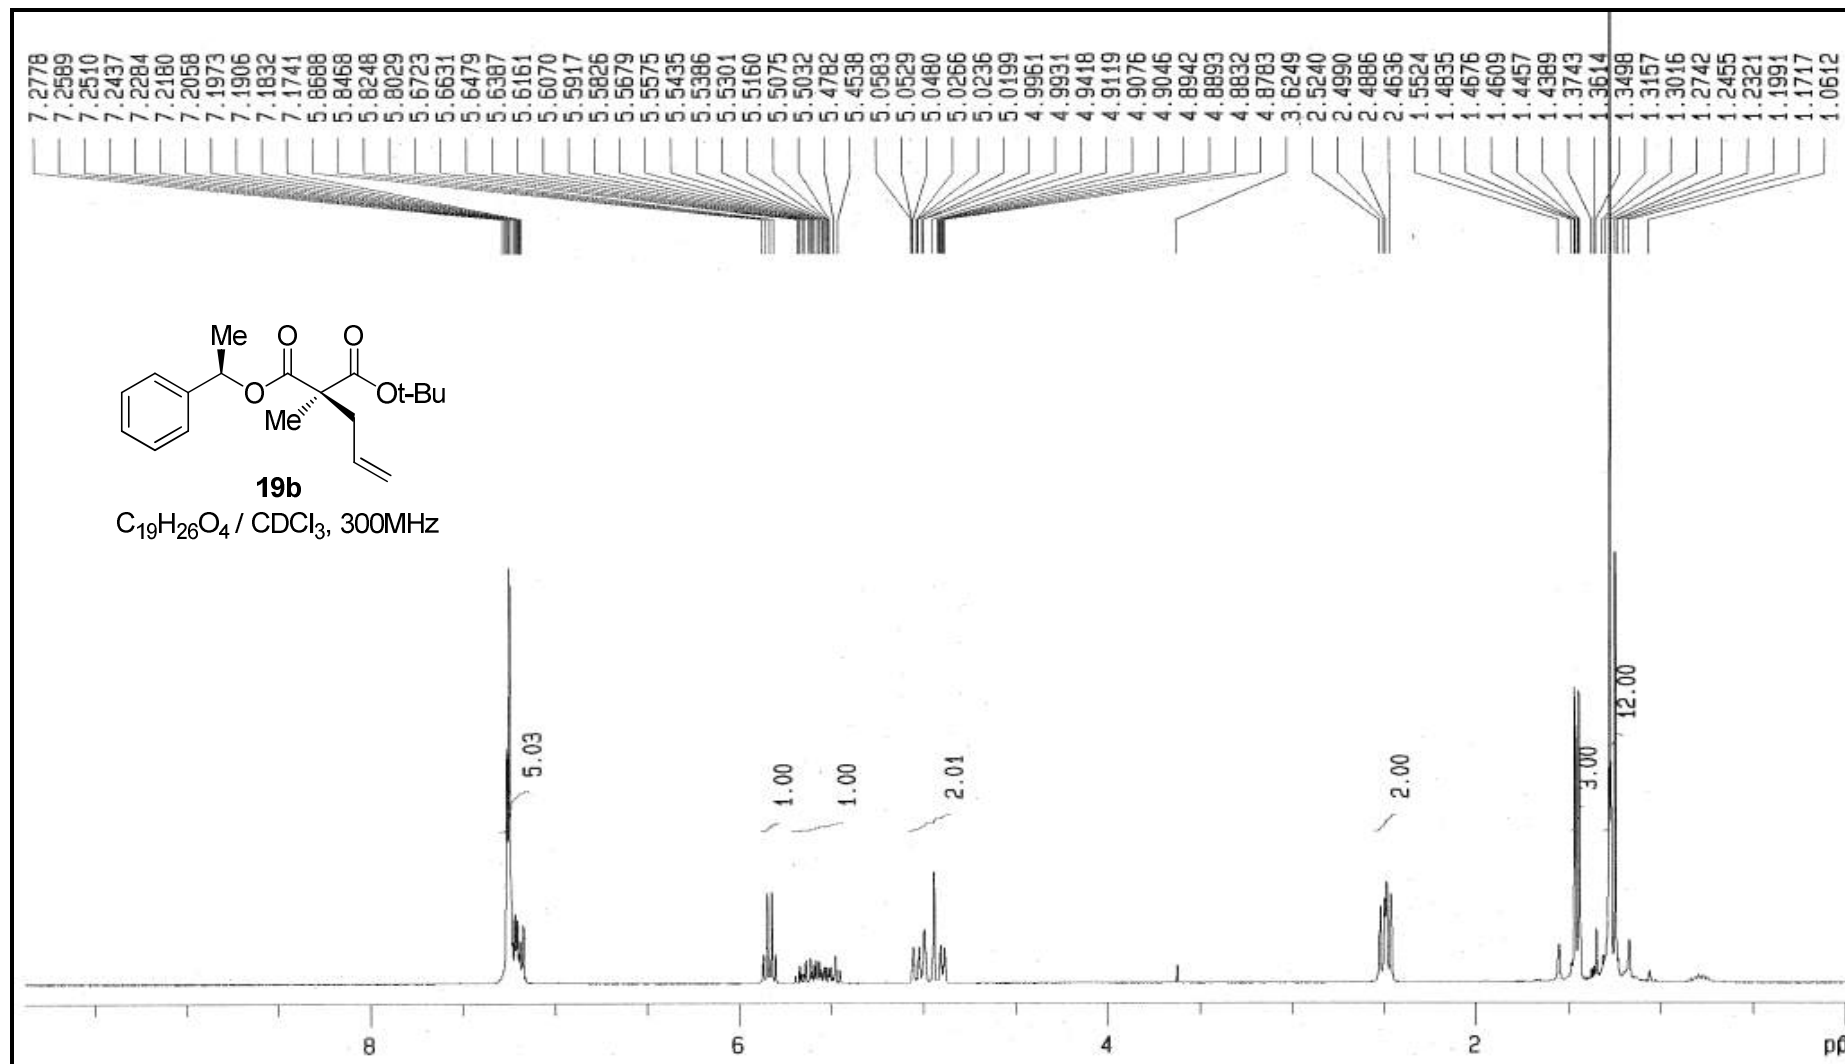

$^{13}\text{C-NMR}$  of compound (**19b**)

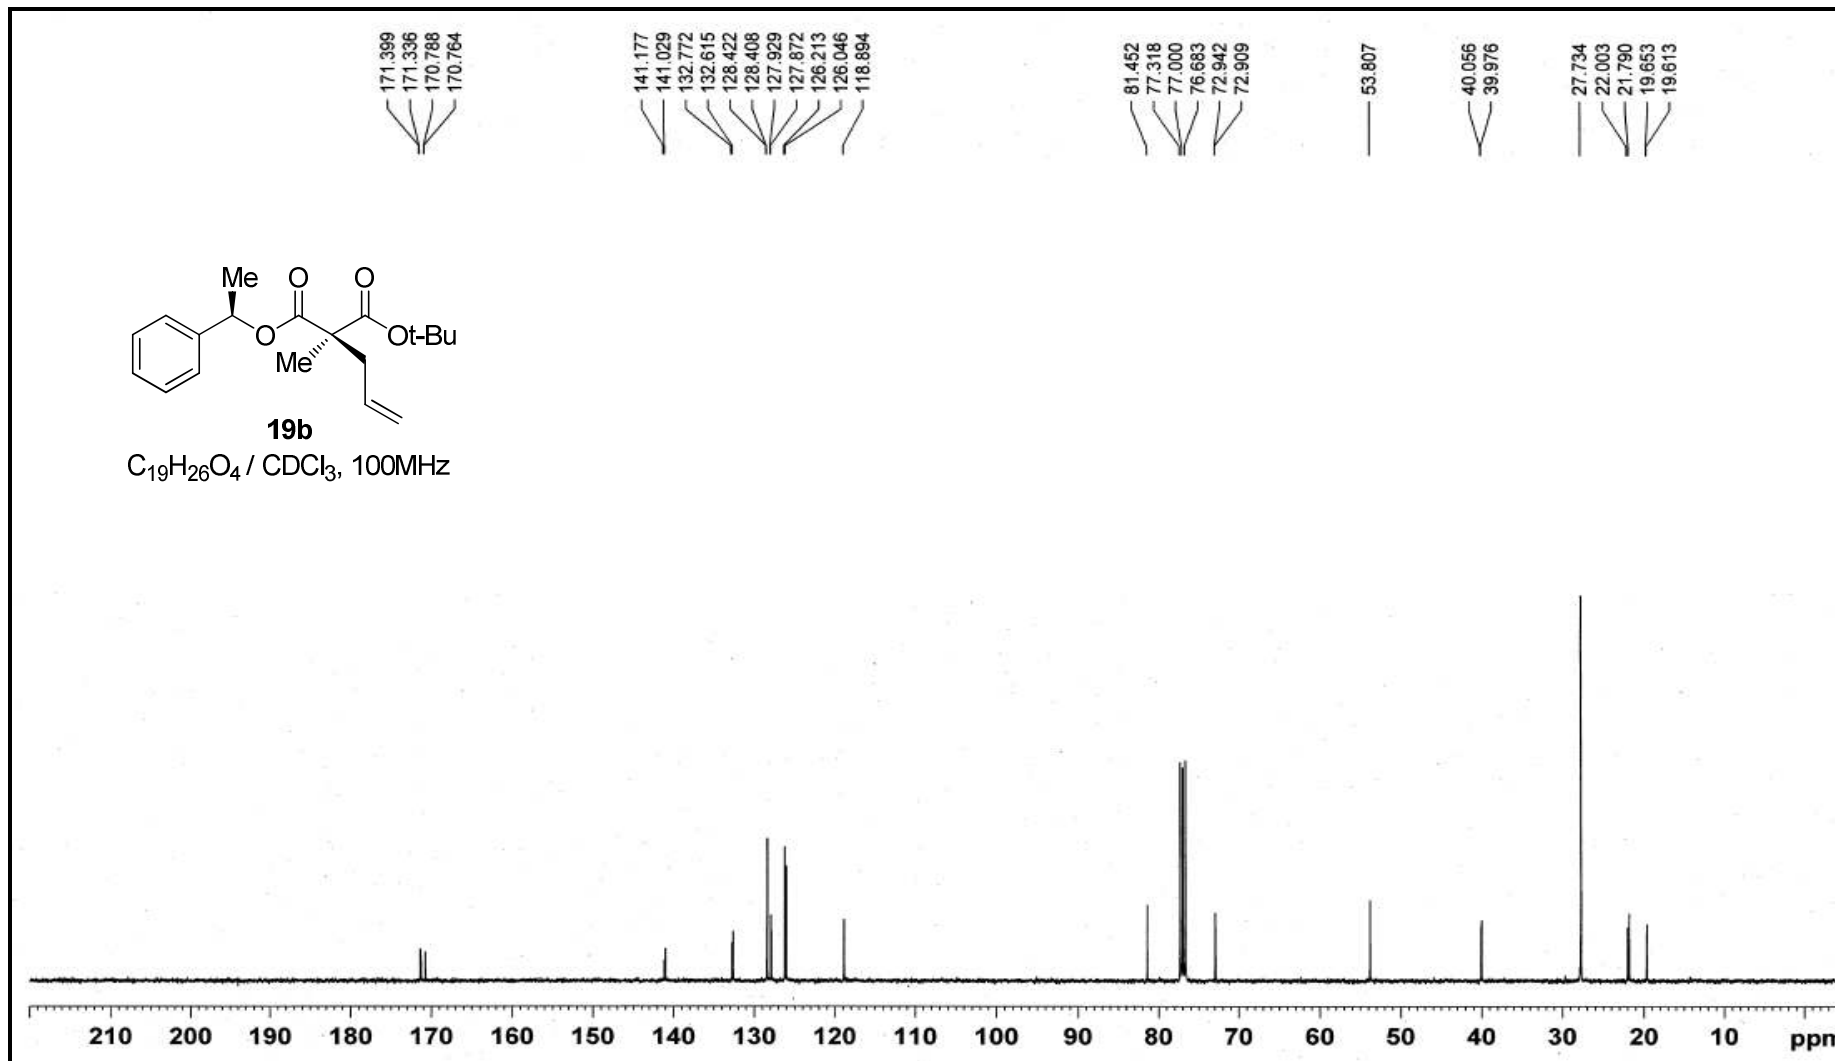

<sup>1</sup>H-NMR of compound (19c)

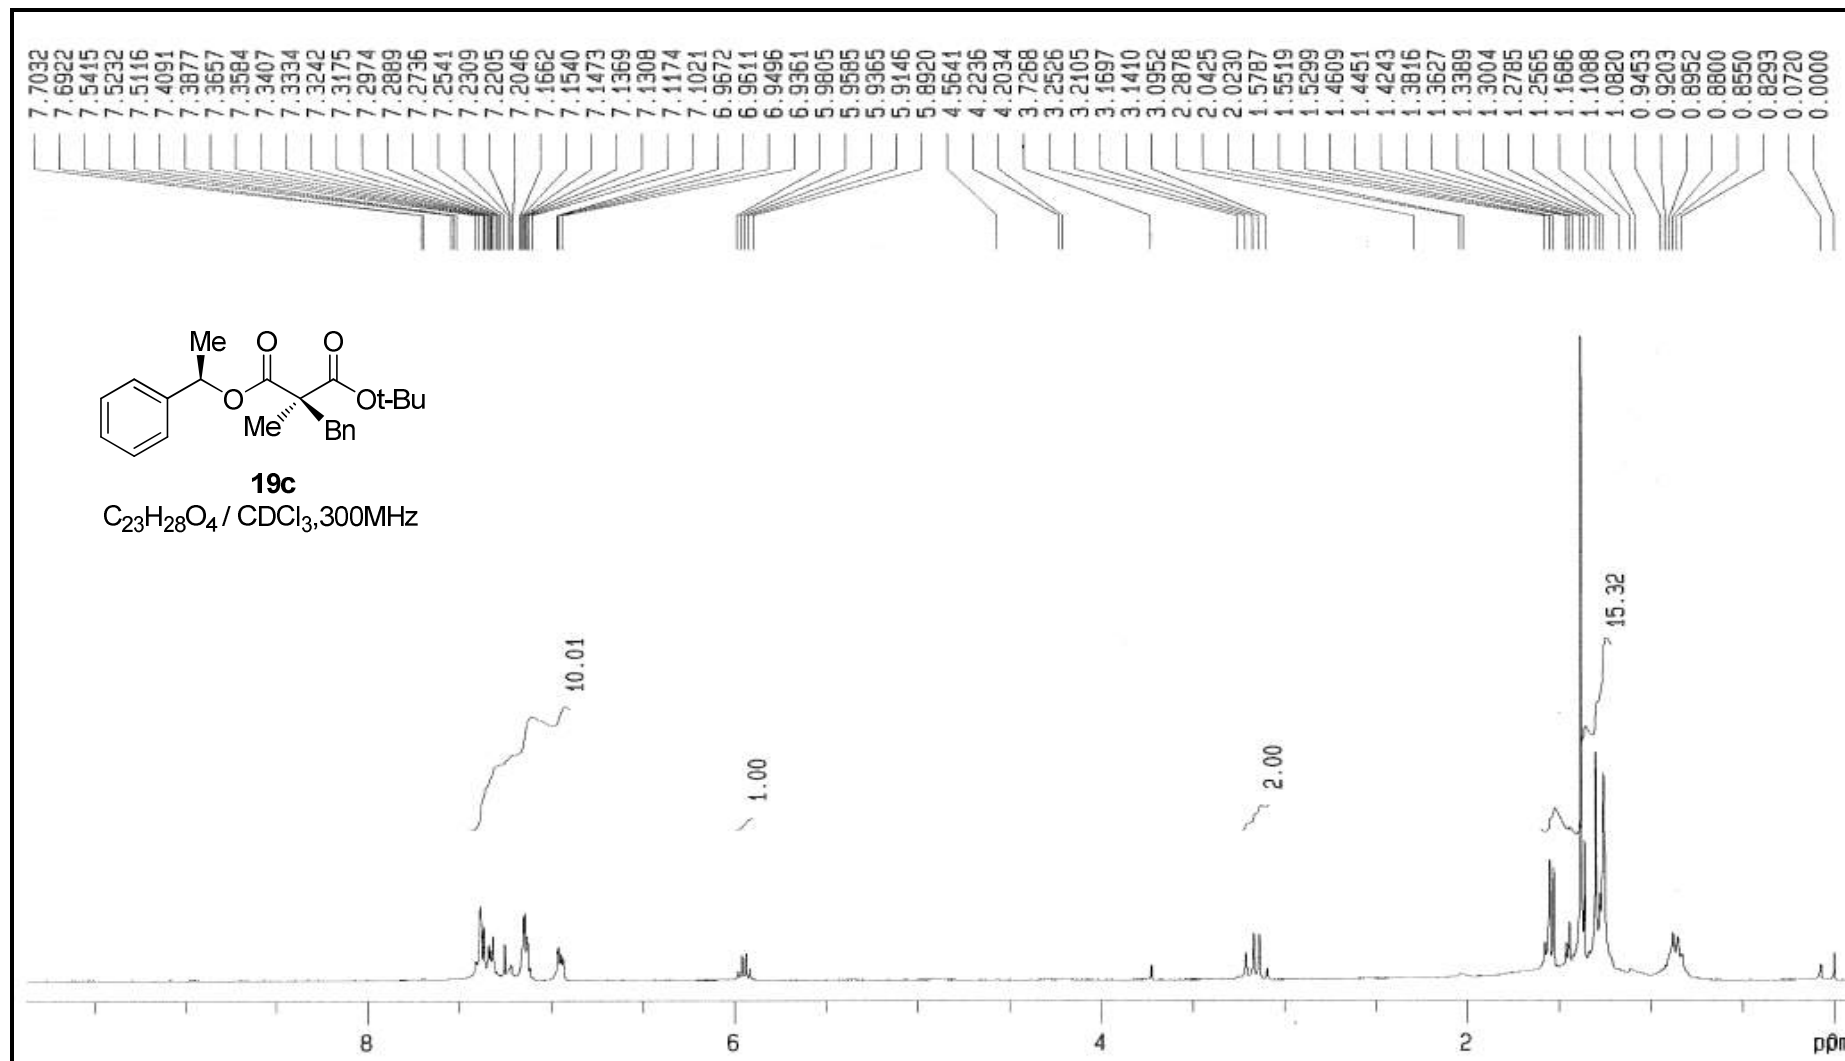





<sup>1</sup>H-NMR of compound (19d)

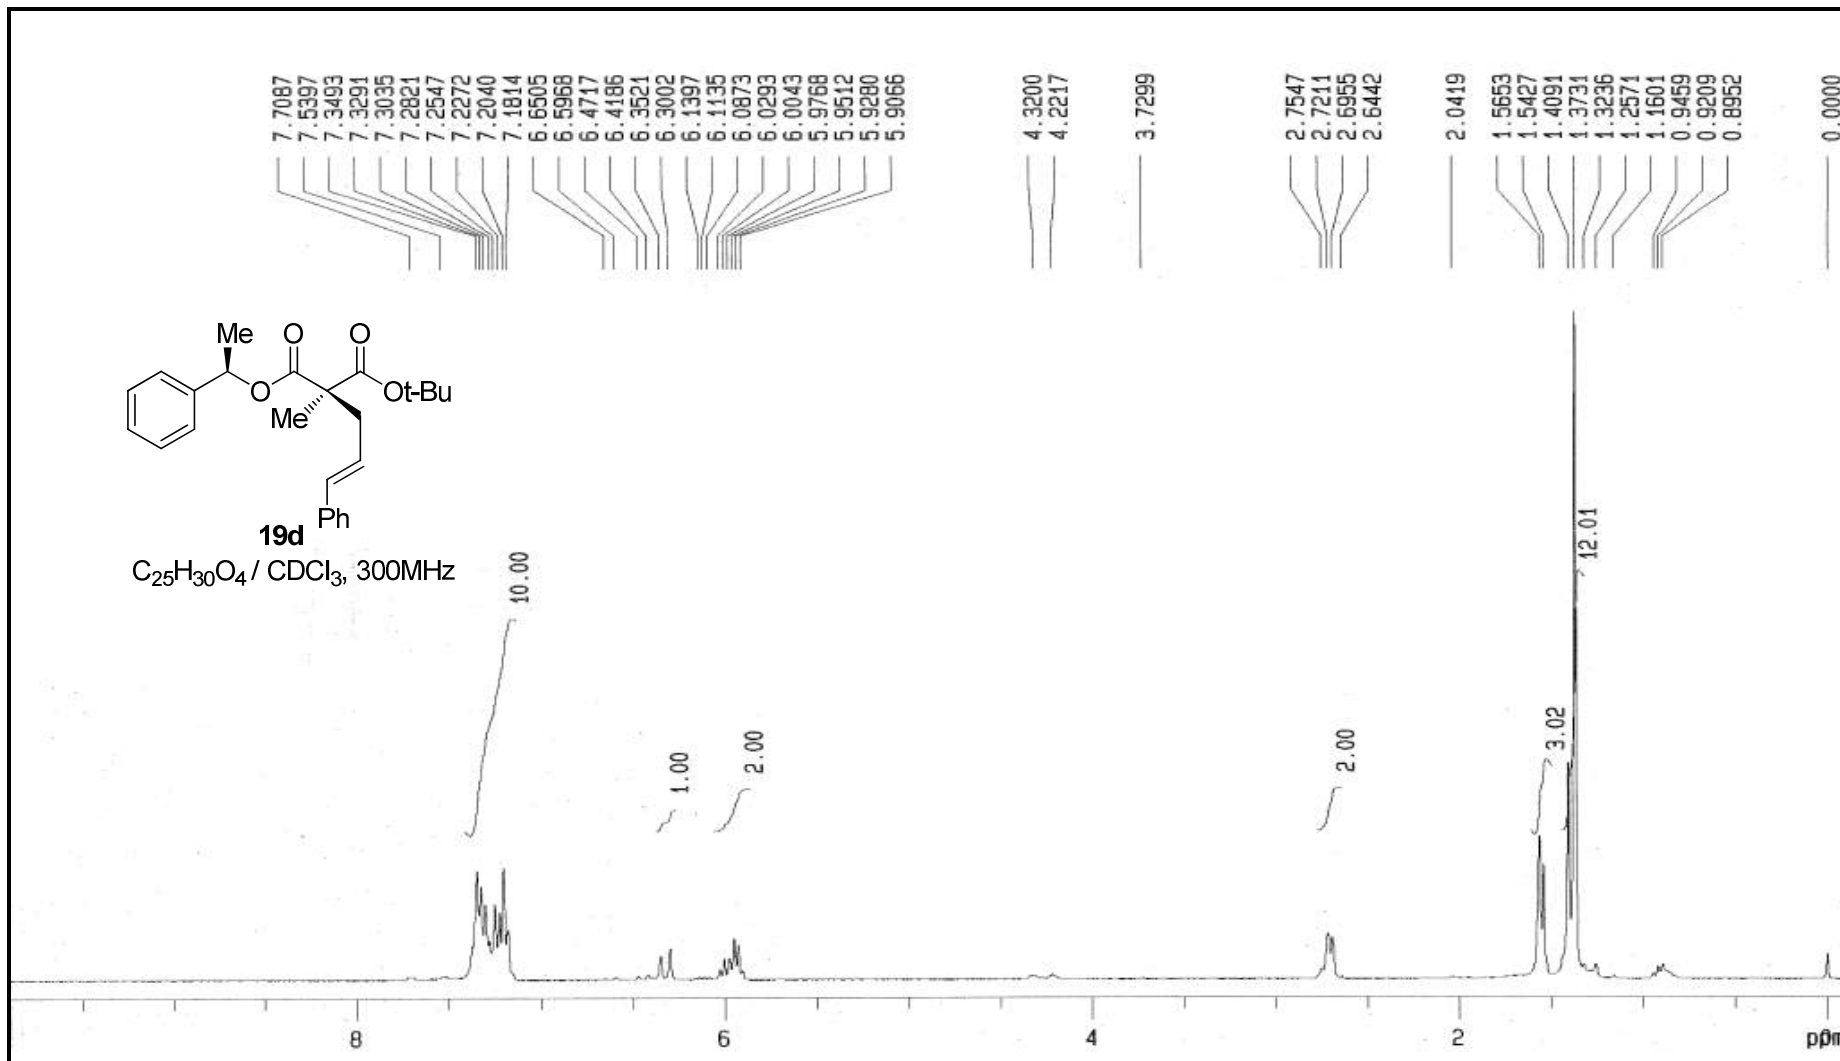

$^{13}\text{C-NMR}$  of compound (**19d**)

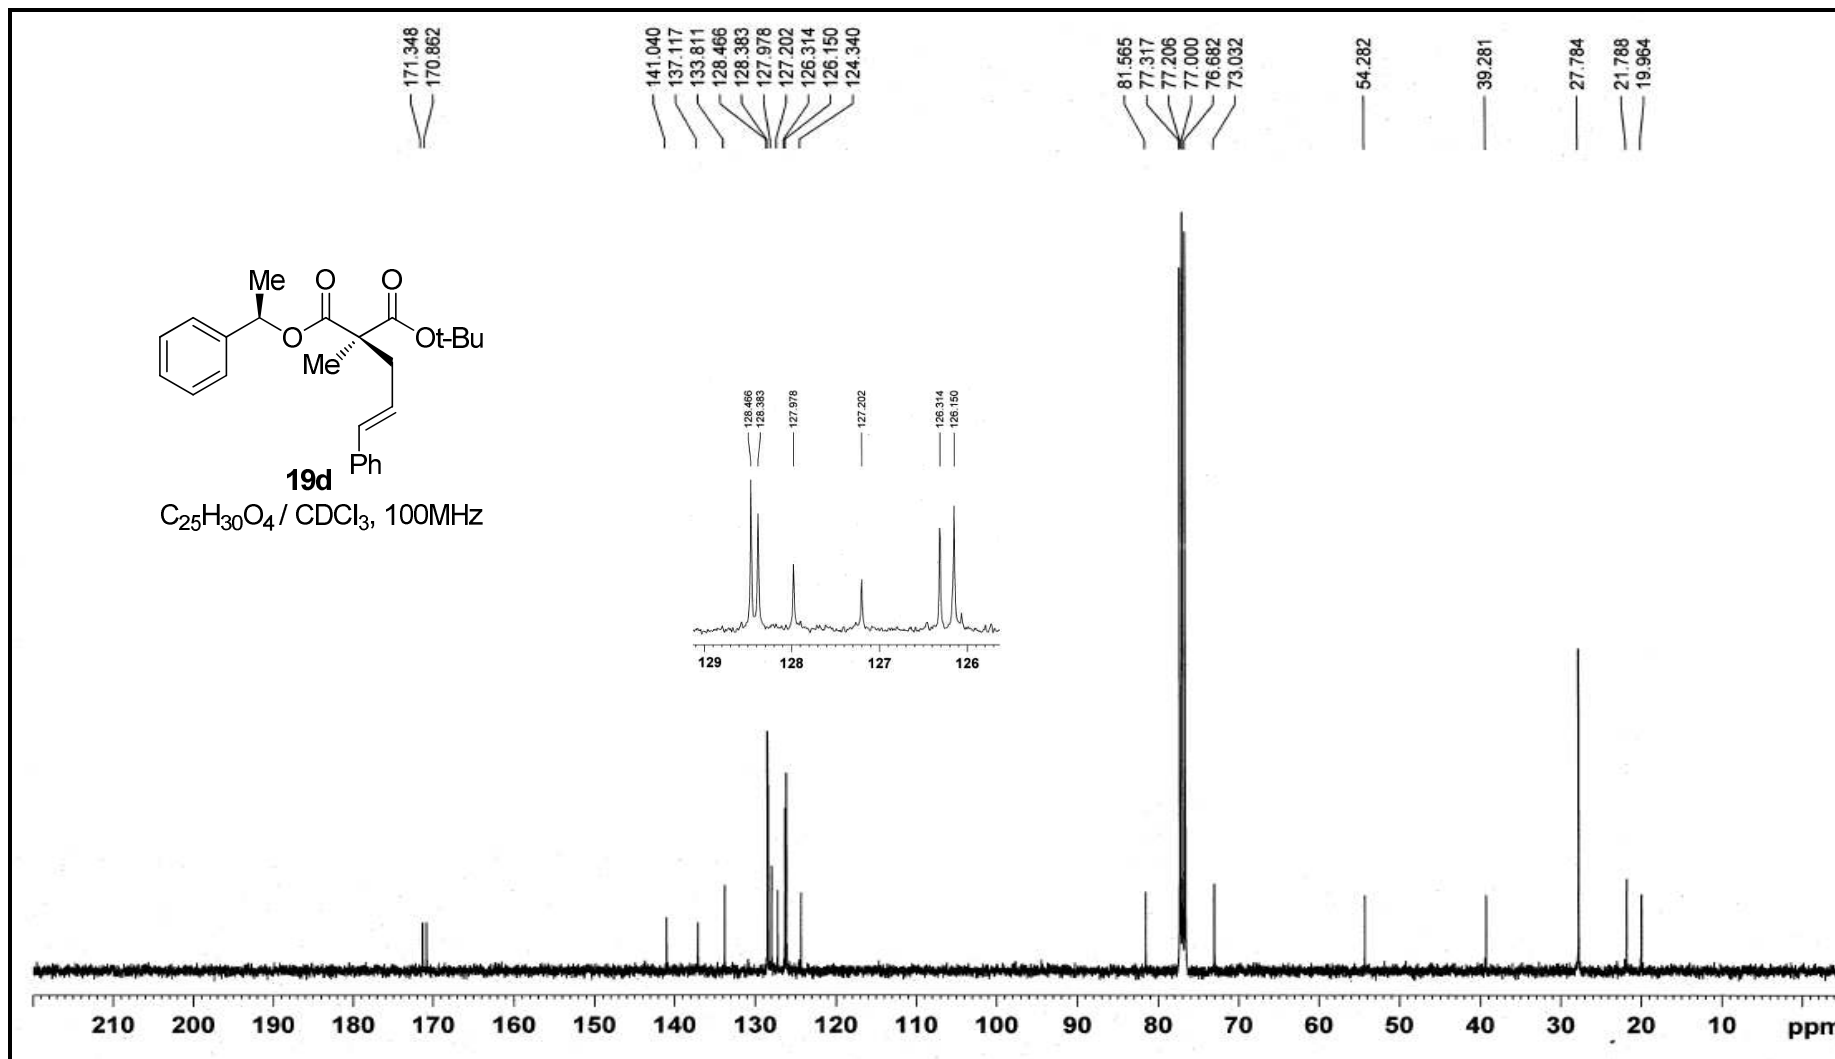

<sup>1</sup>H-NMR of compound (19e)

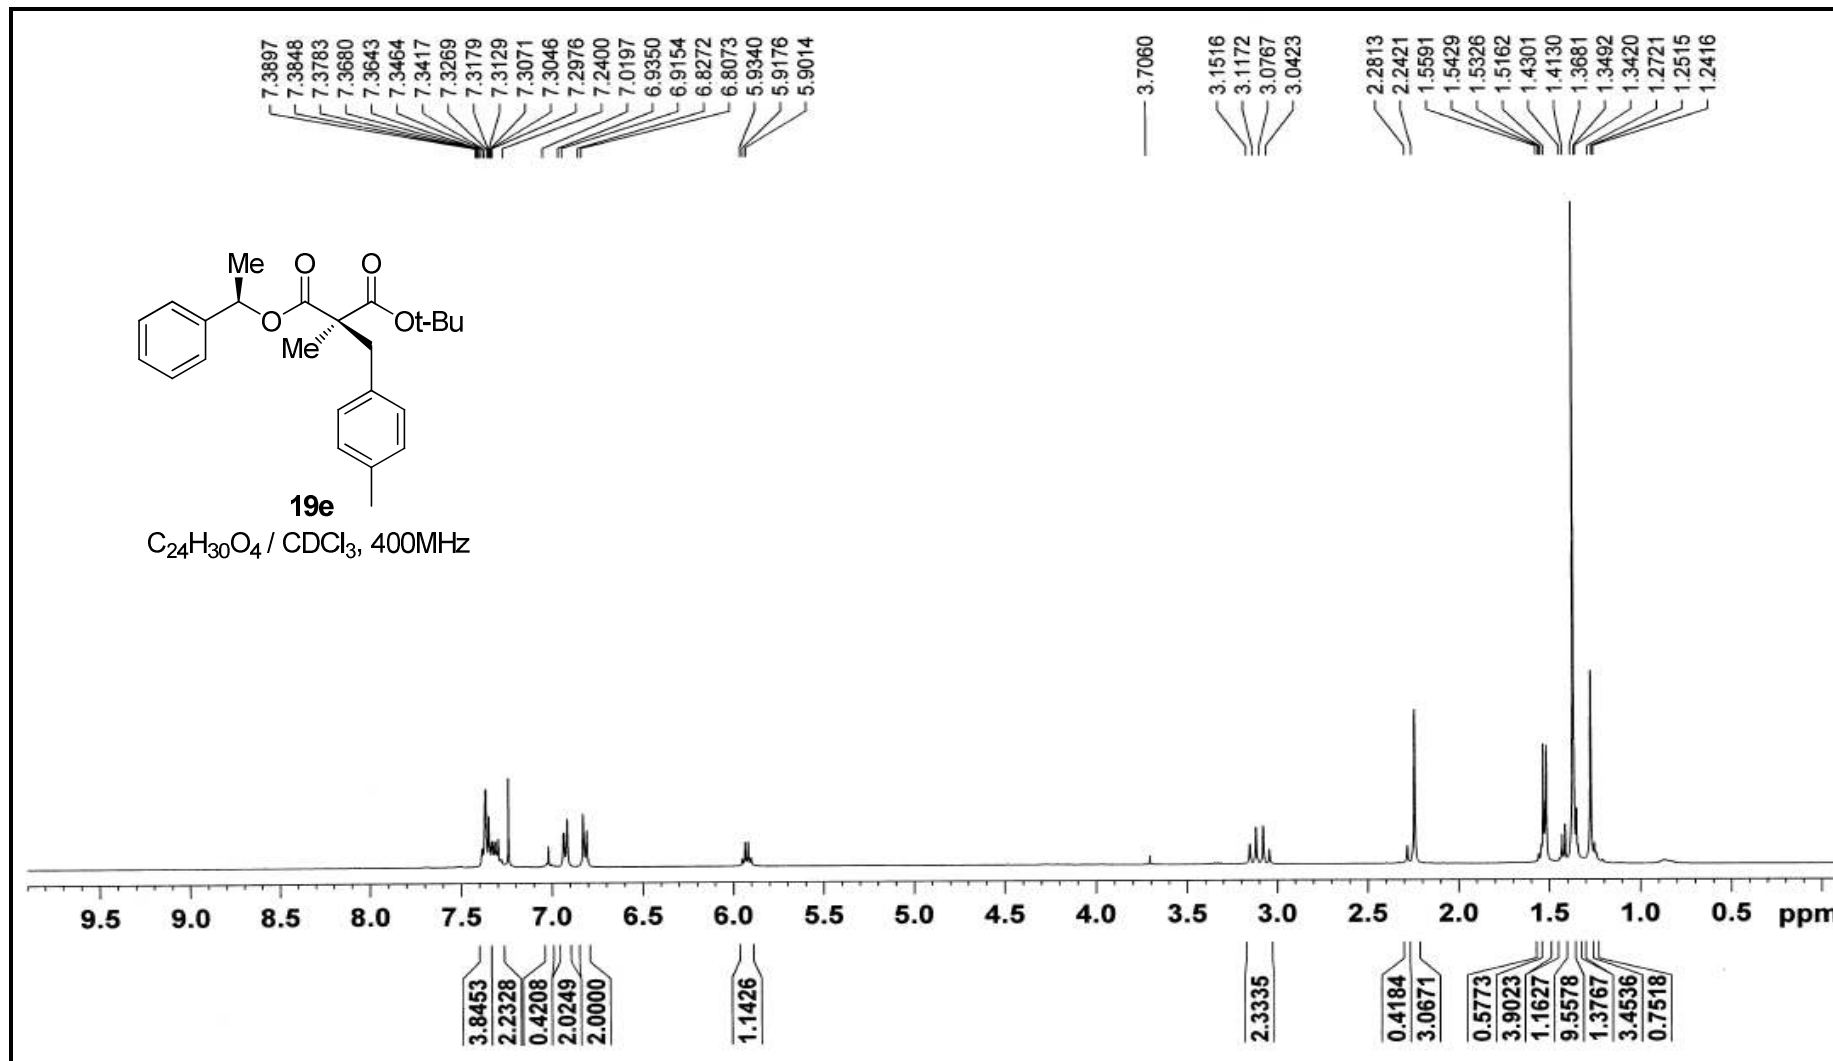

$^{13}\text{C-NMR}$  of compound (**19e**)

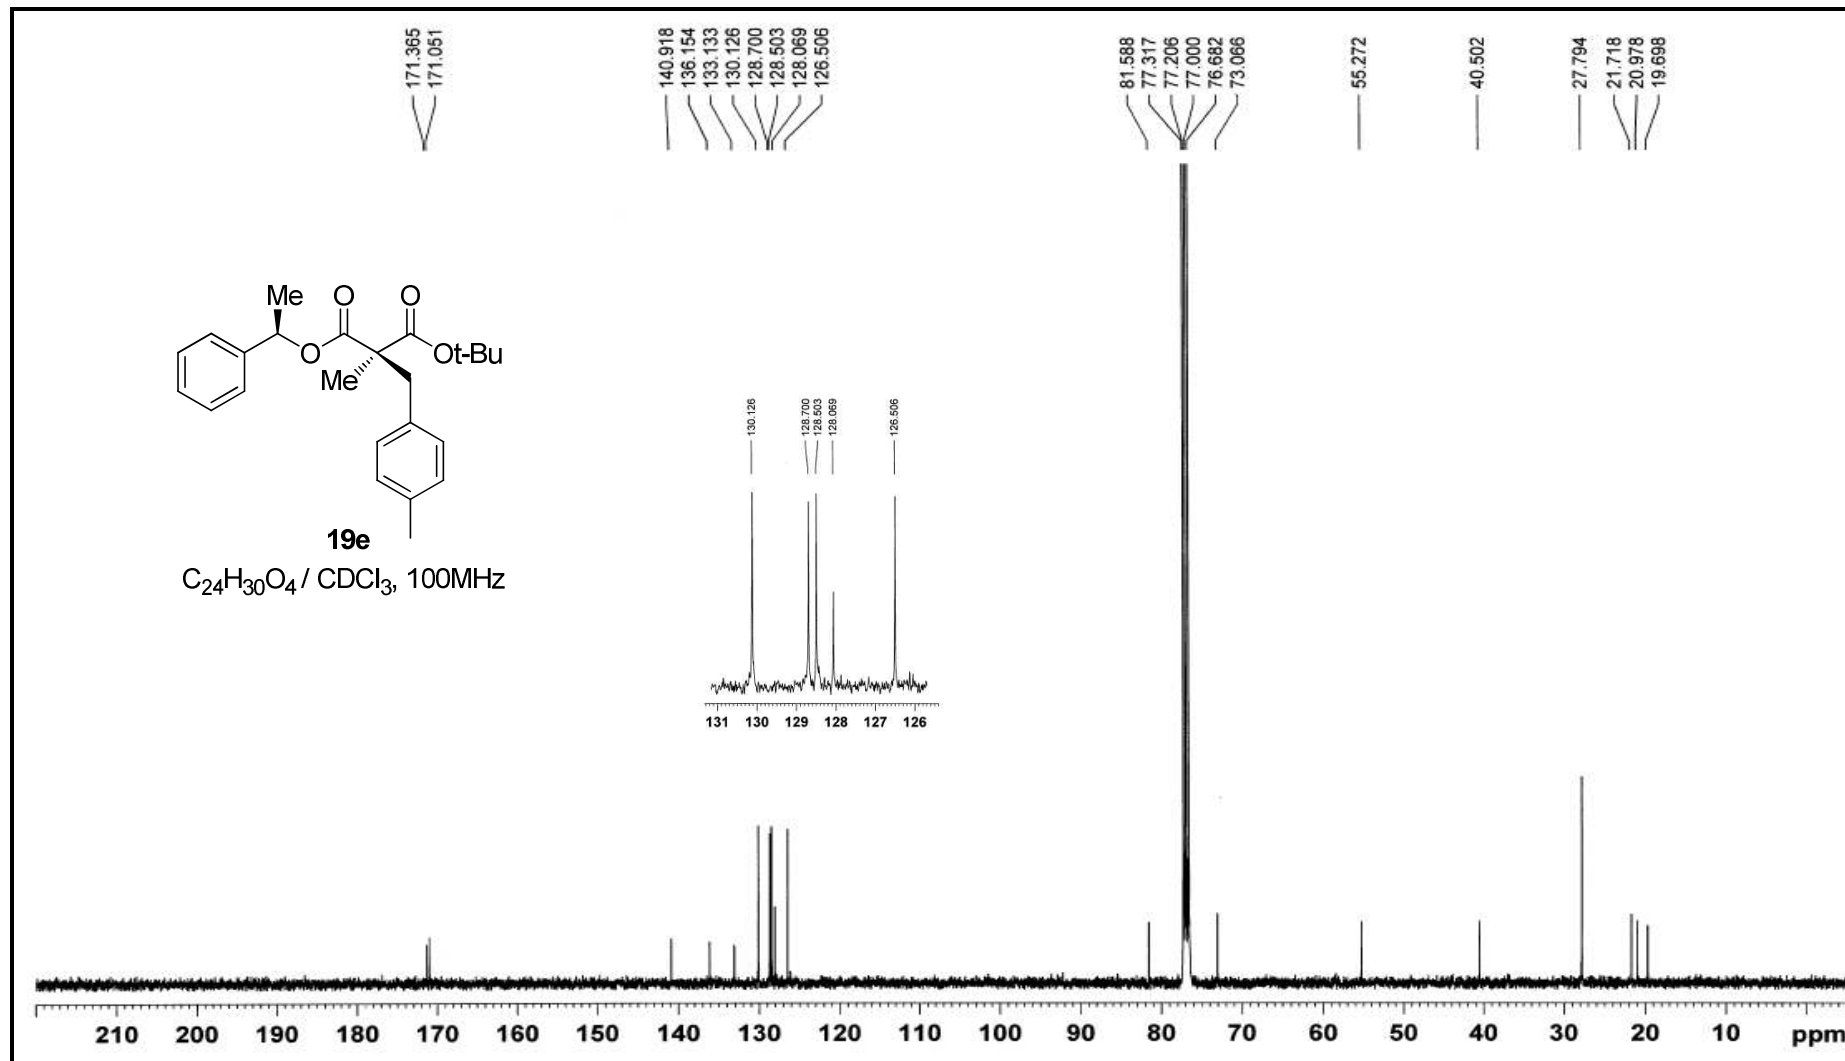

<sup>1</sup>H-NMR of compound (19f)

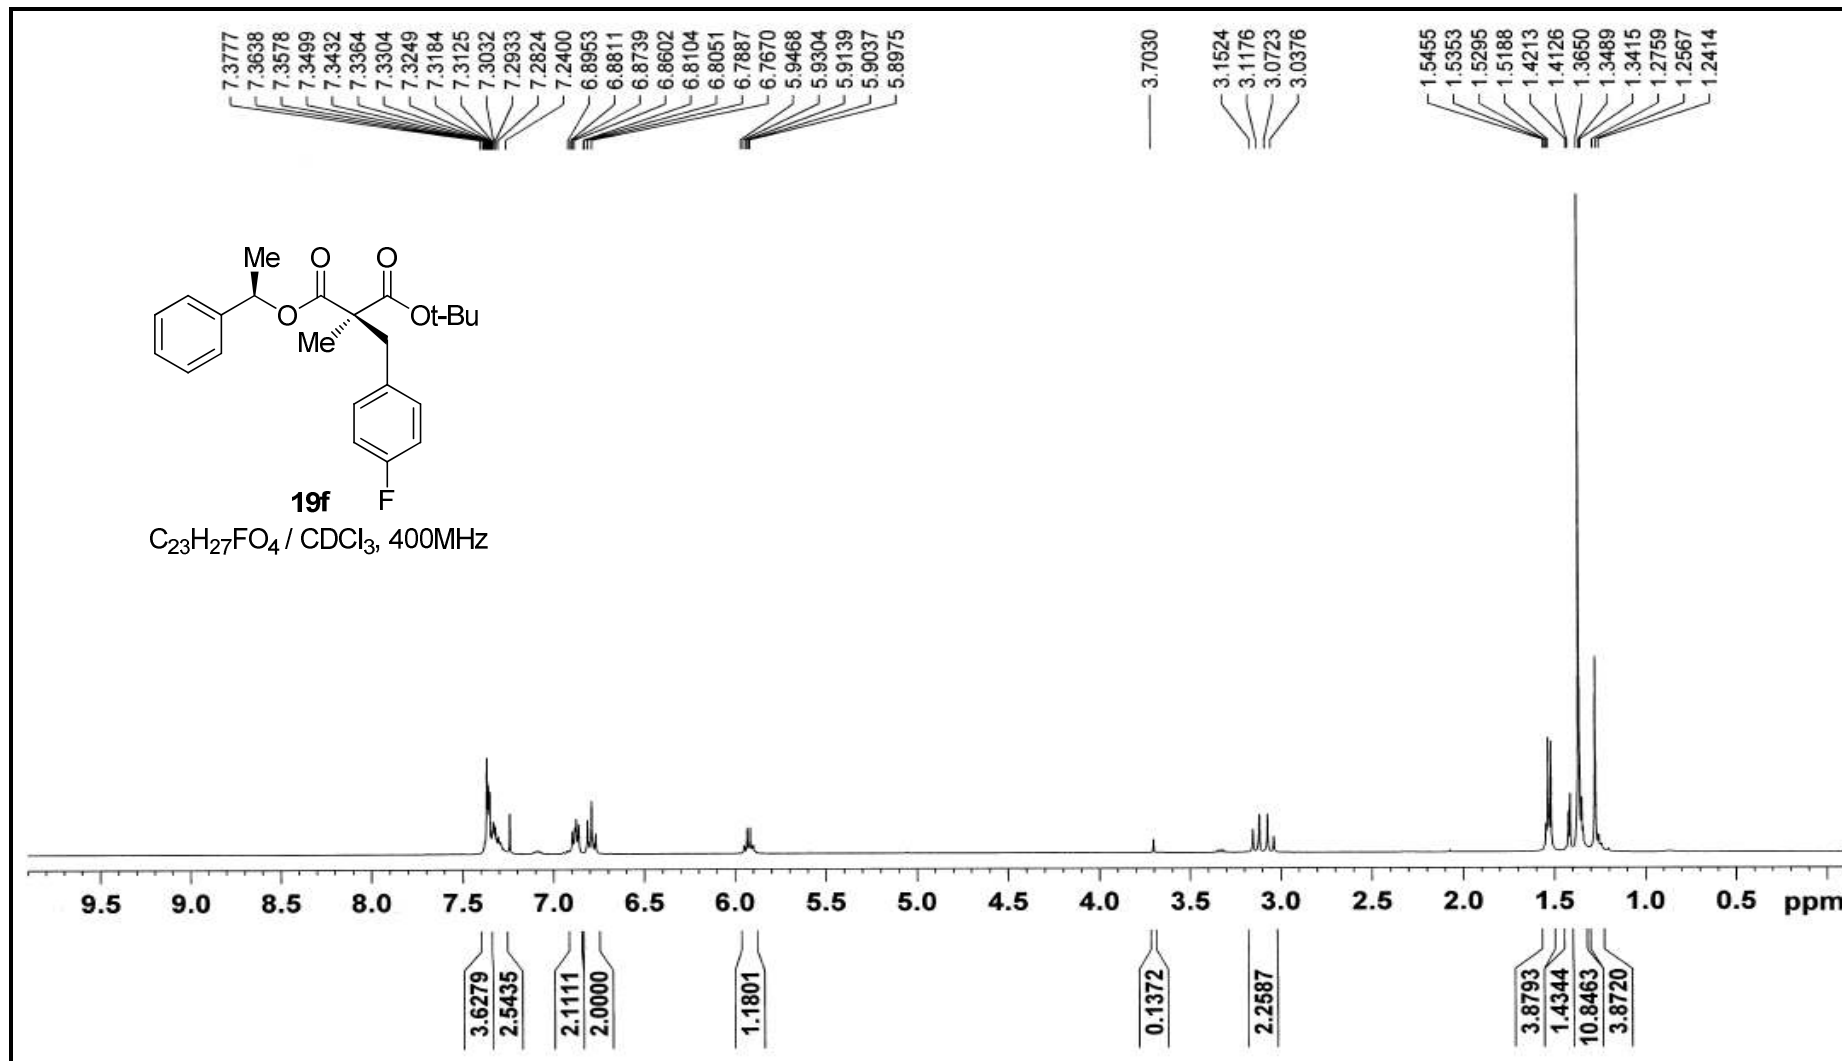

$^{13}\text{C-NMR}$  of compound (**19f**)

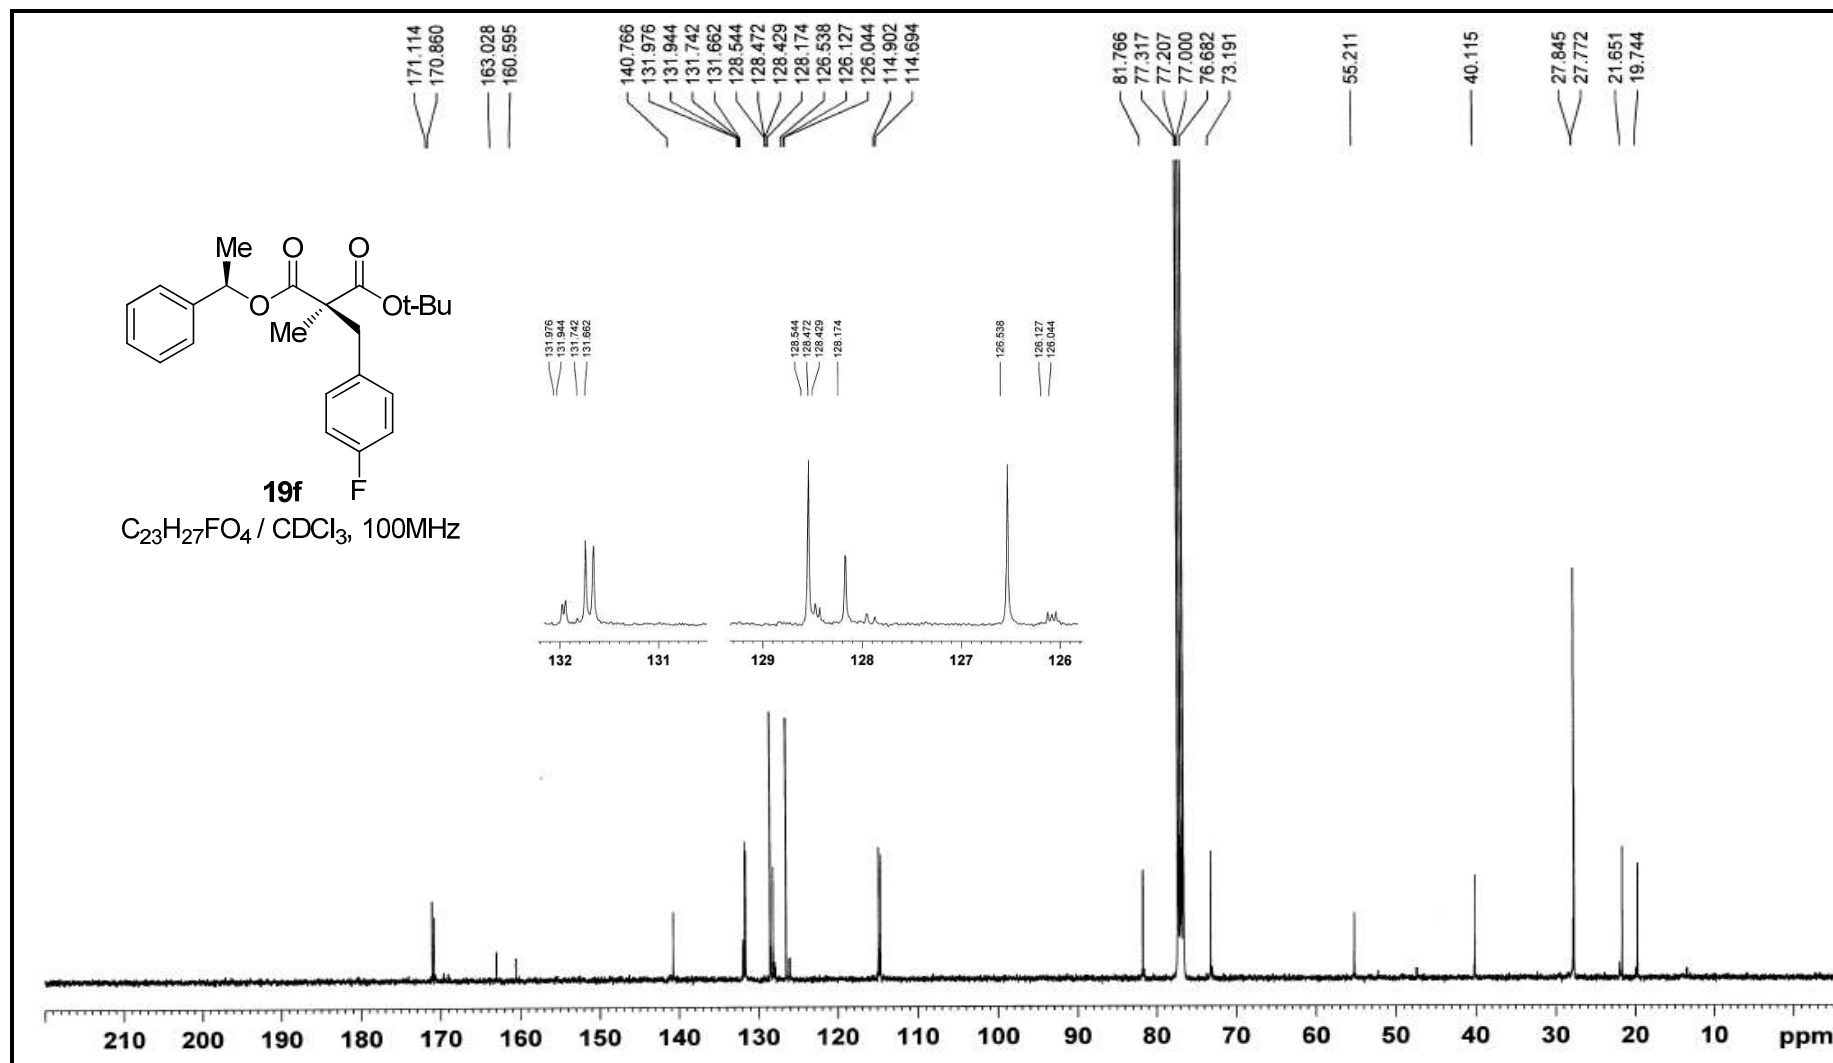

<sup>1</sup>H-NMR of compound (20)

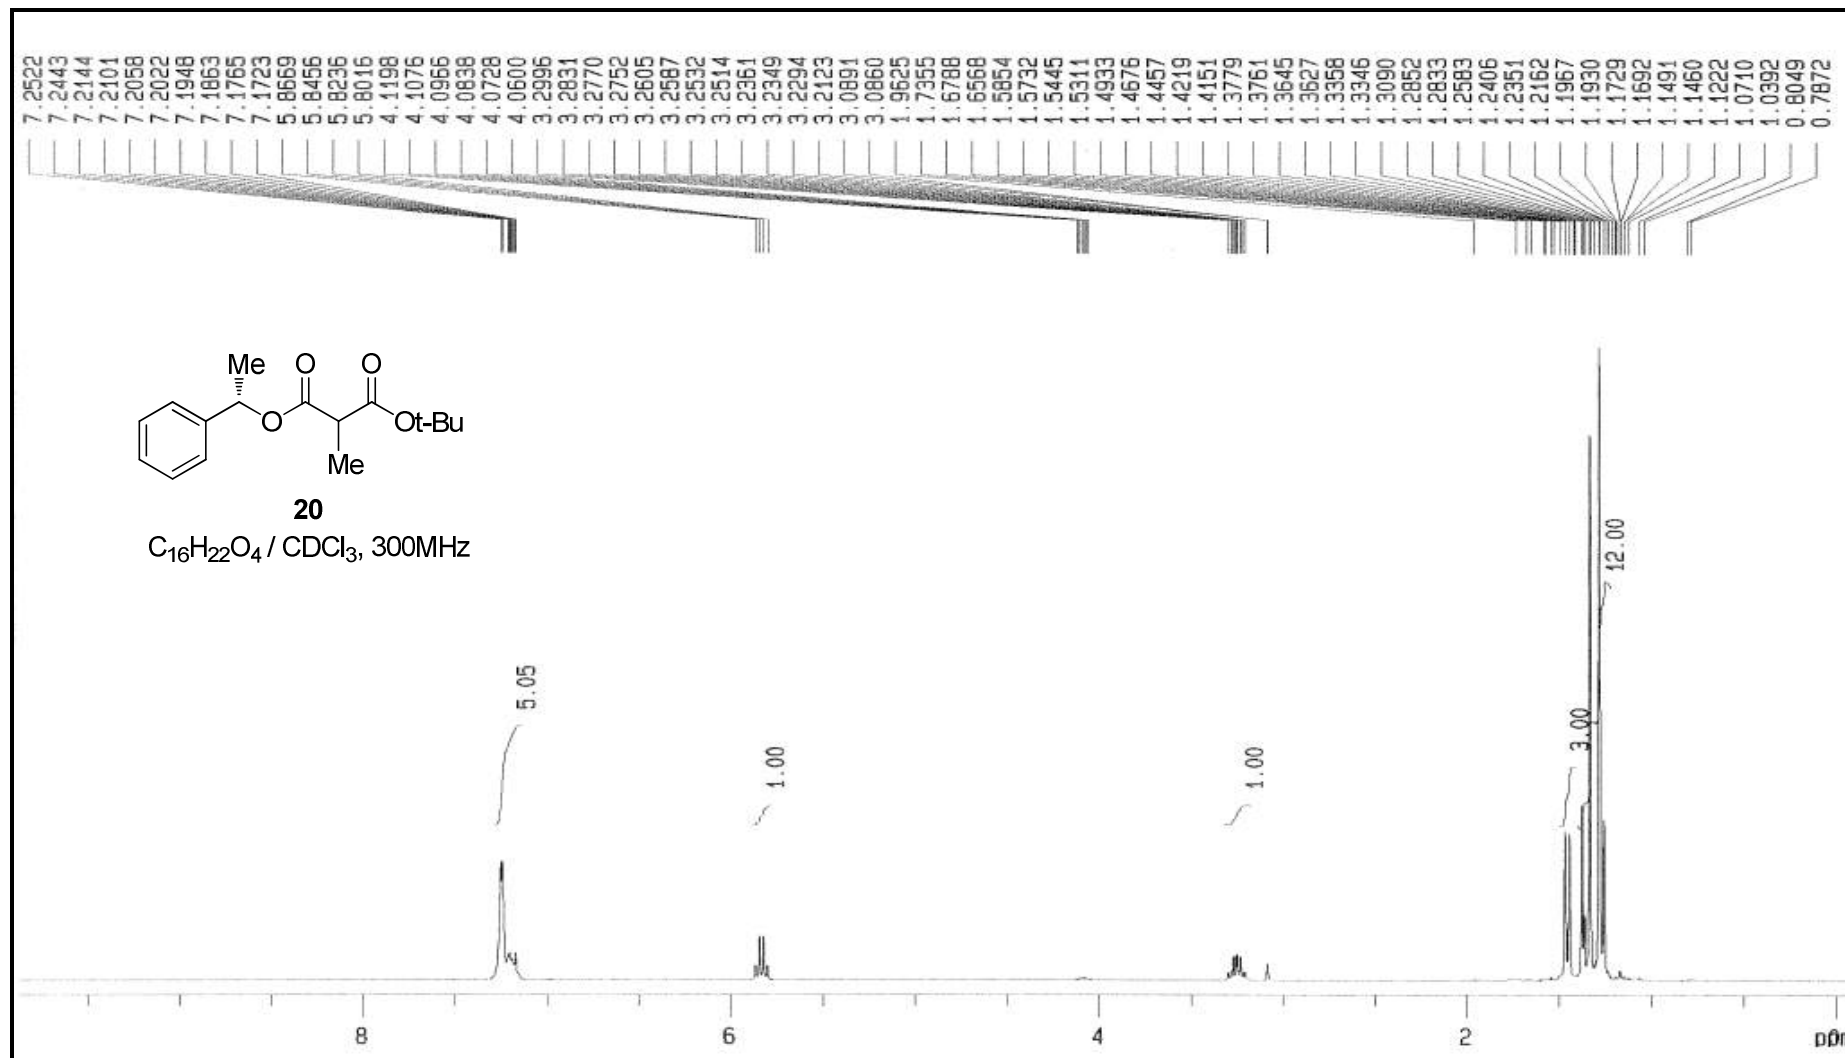



$^{13}\text{C-NMR}$  of compound (**20**)

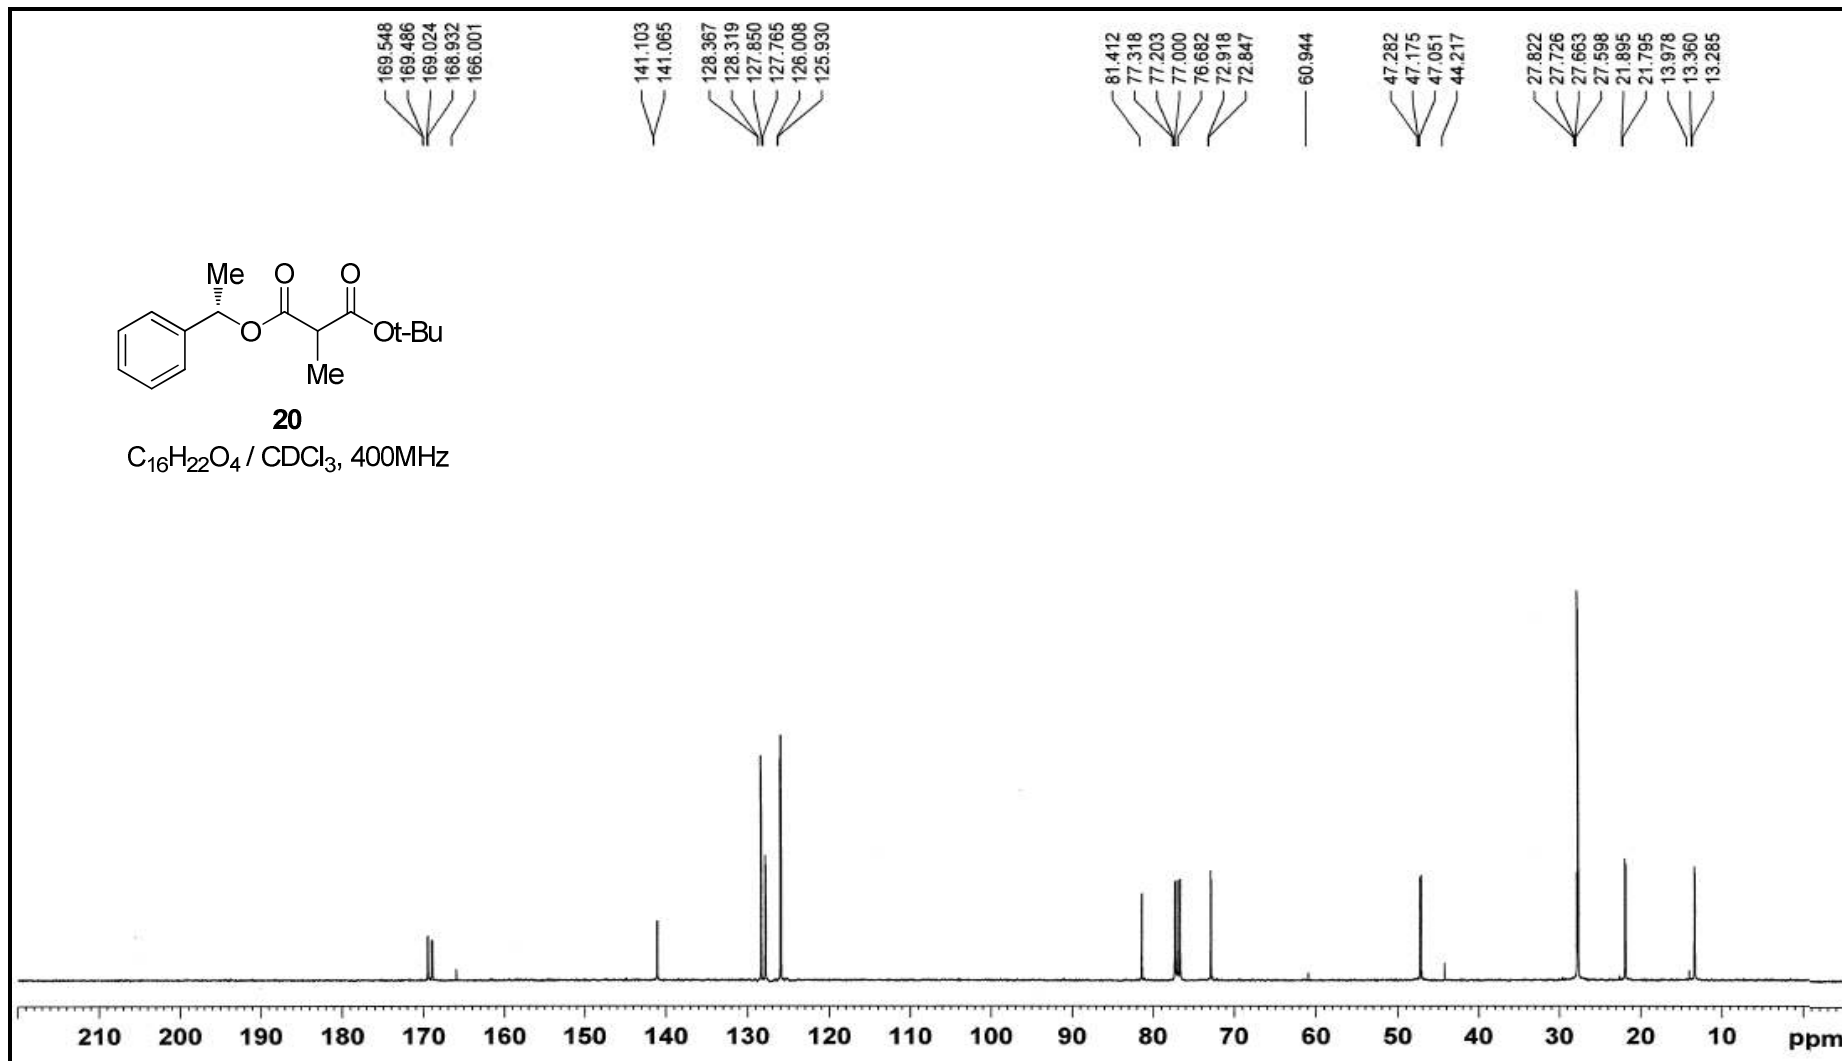

<sup>1</sup>H-NMR of compound (20c)

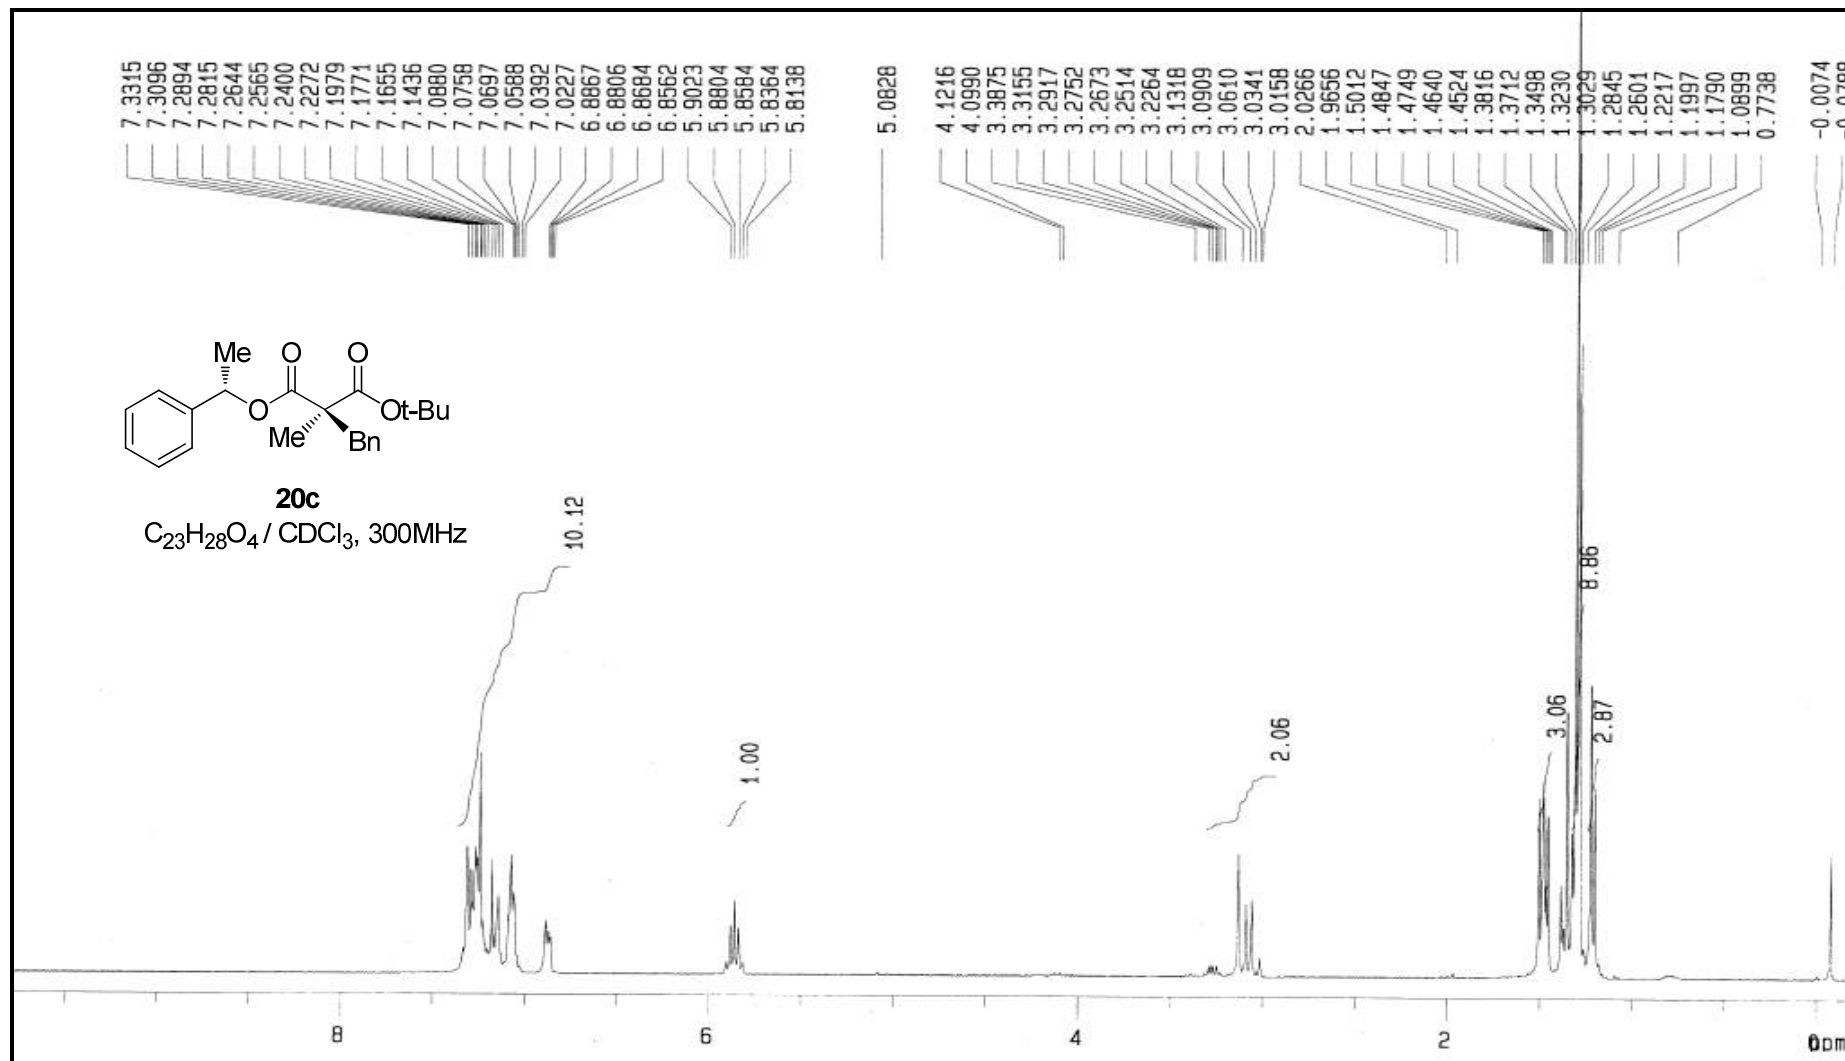

<sup>13</sup>C-NMR of compound (20c)

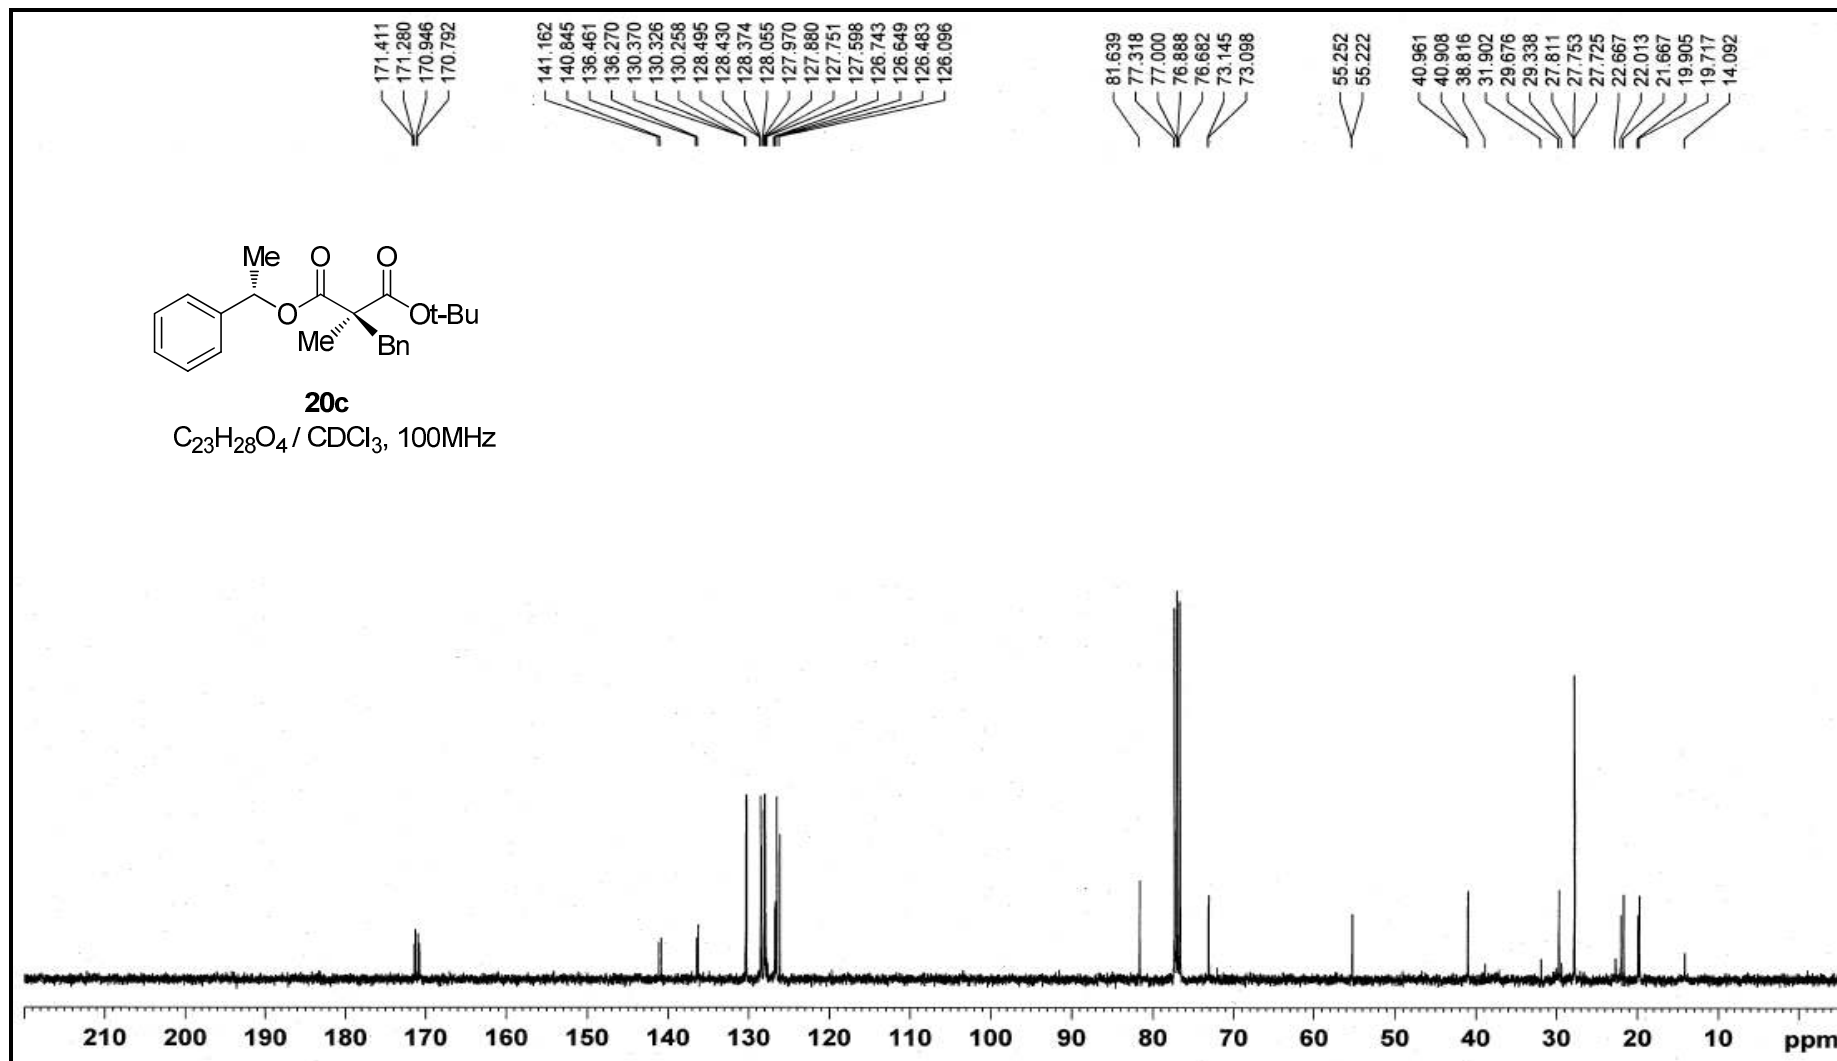

<sup>1</sup>H-NMR of compound (21)

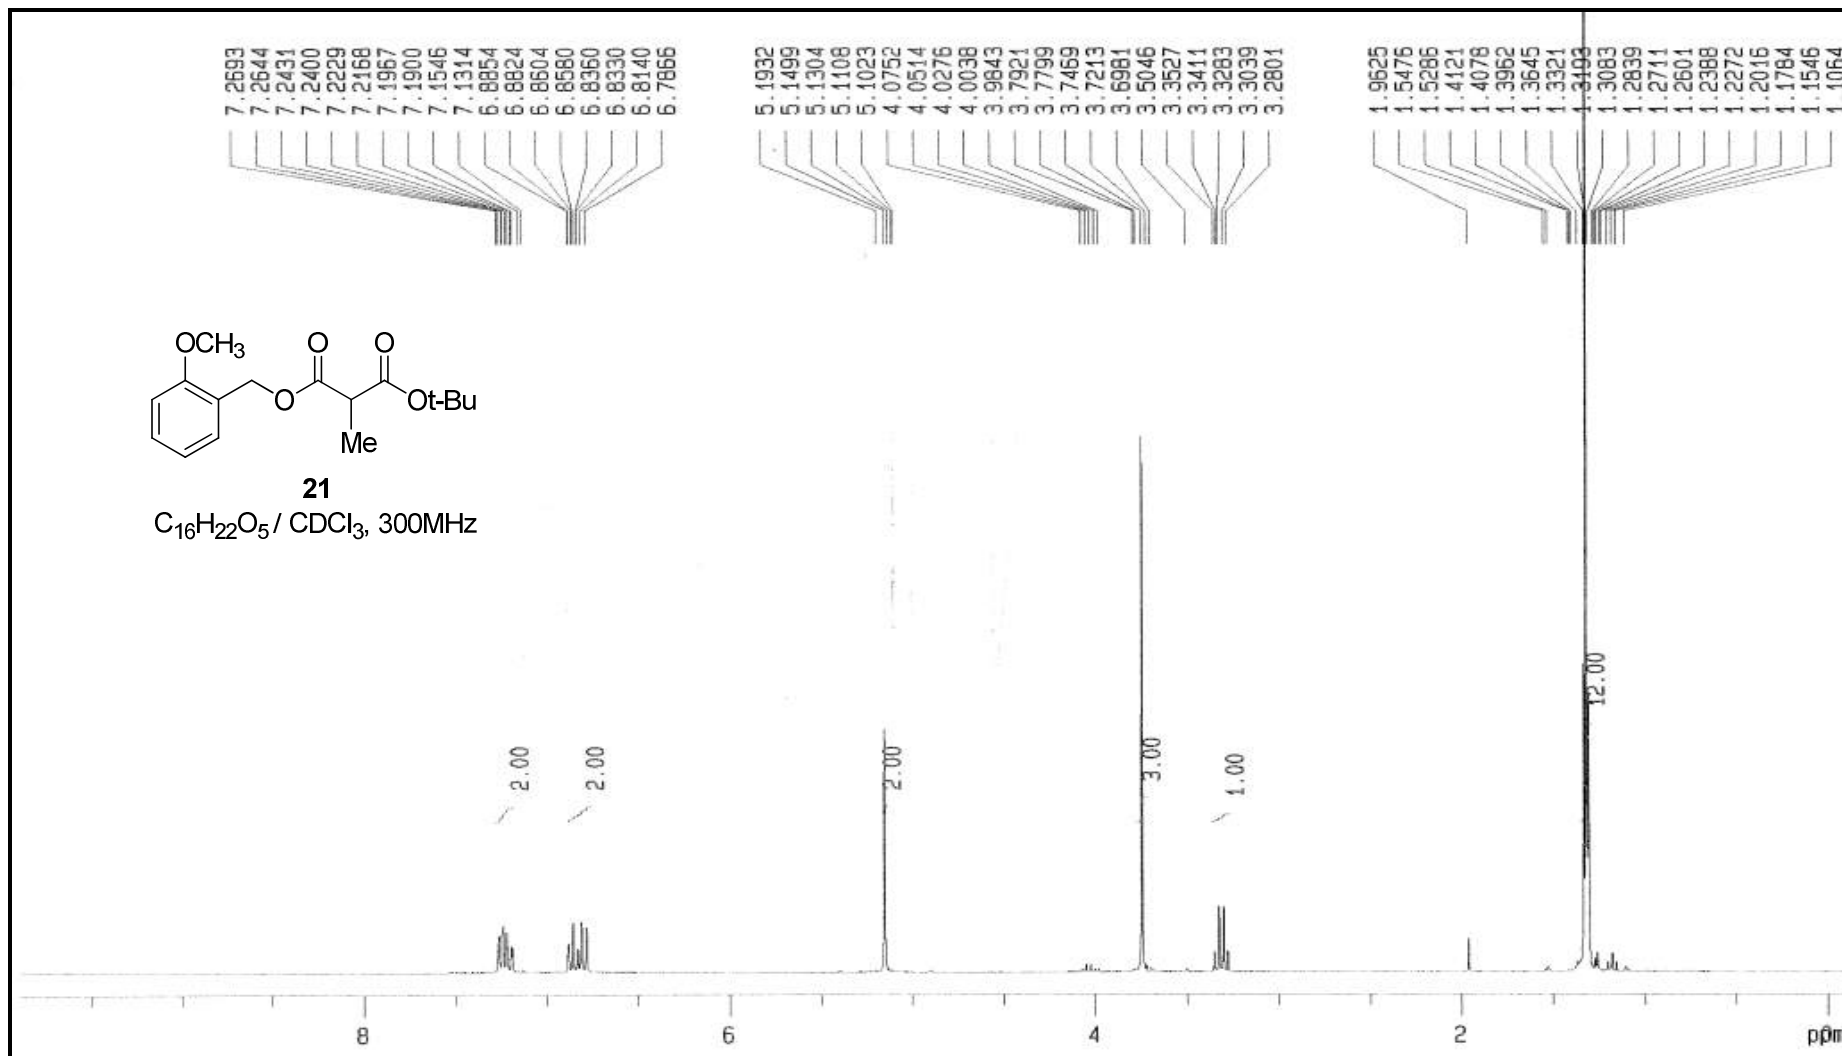

<sup>13</sup>C-NMR of compound (21)

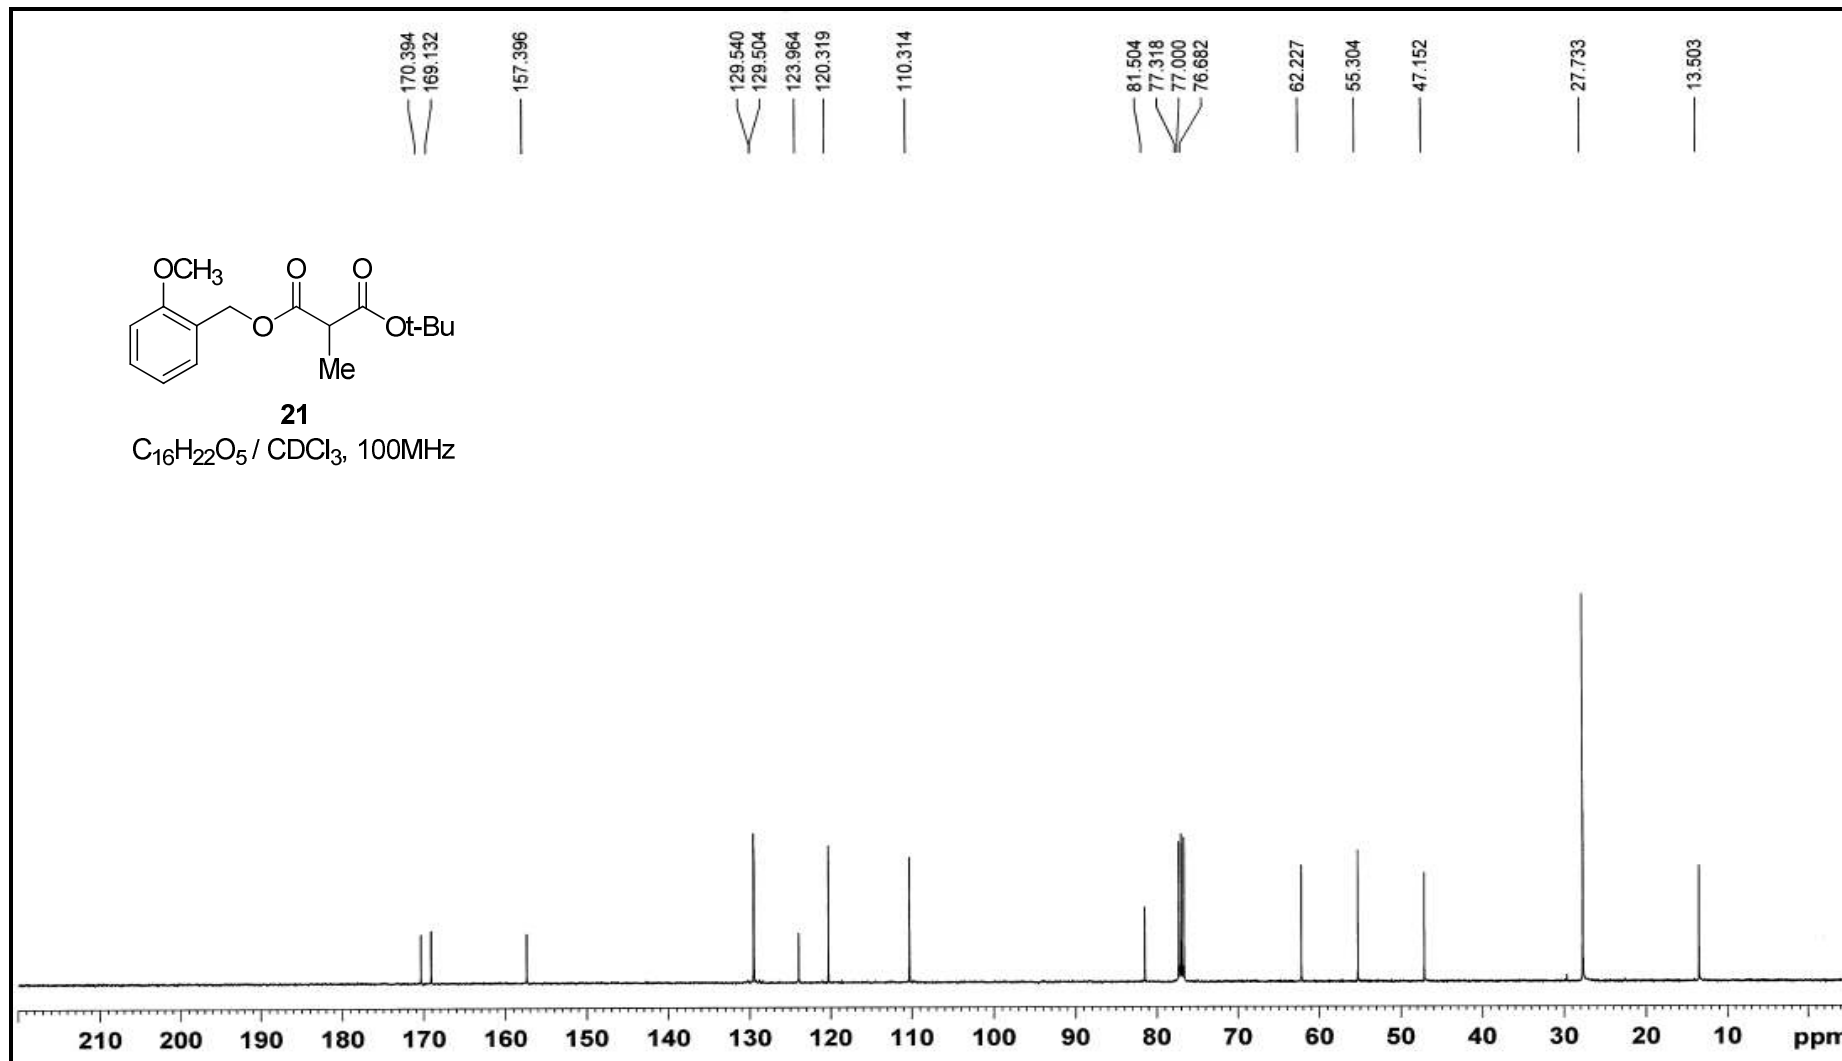

<sup>1</sup>H-NMR of compound (21c)

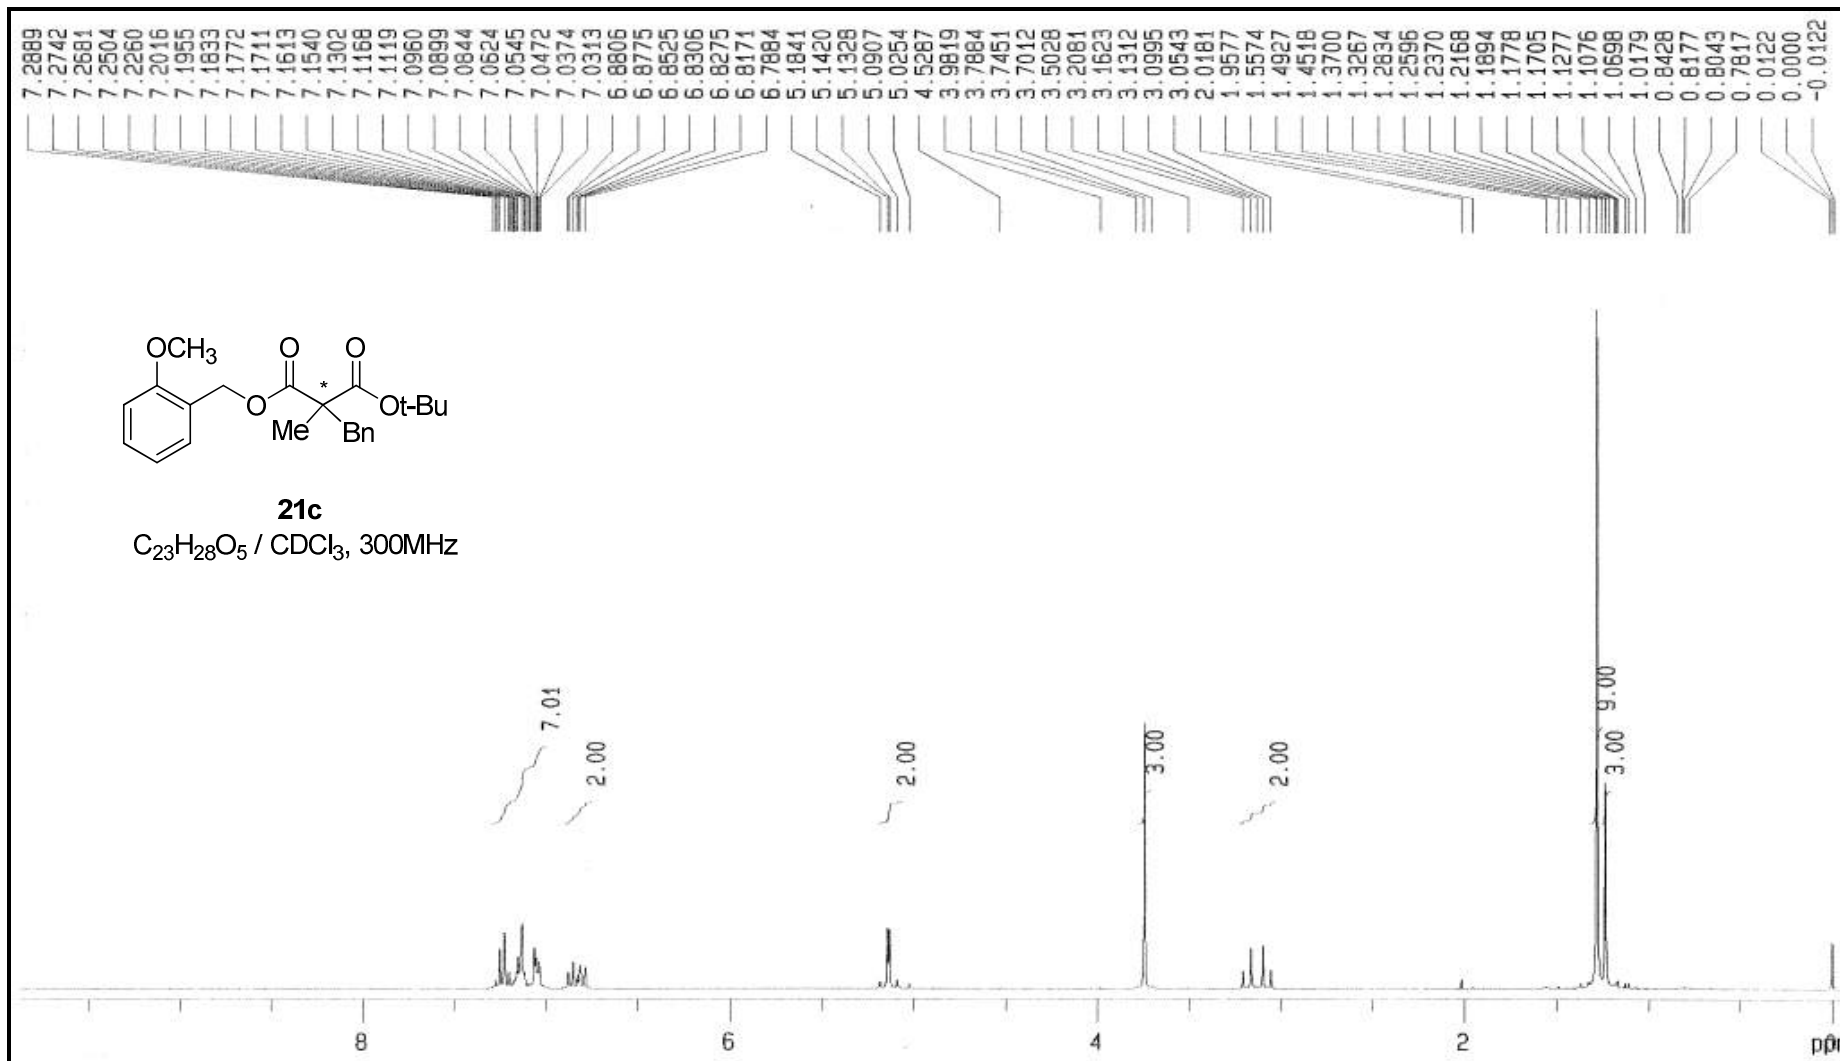

<sup>13</sup>C-NMR of compound (21c)

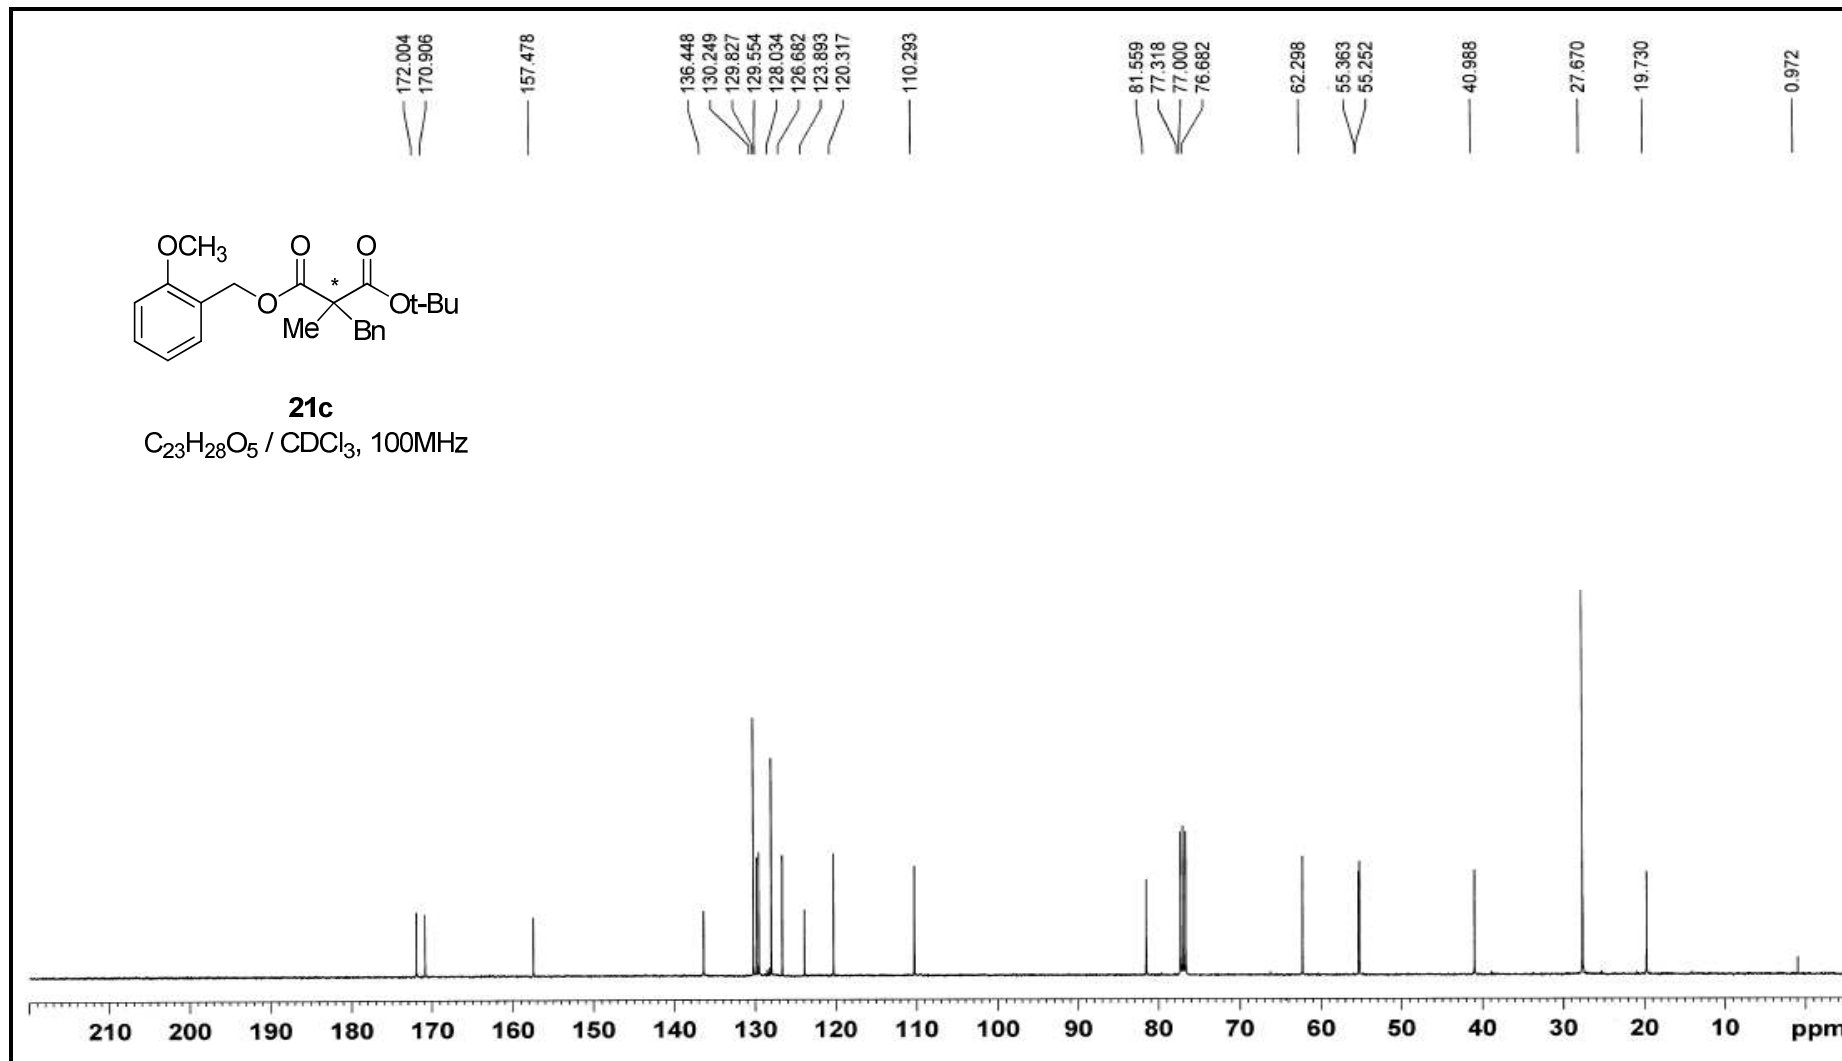

<sup>1</sup>H-NMR of compound (22)

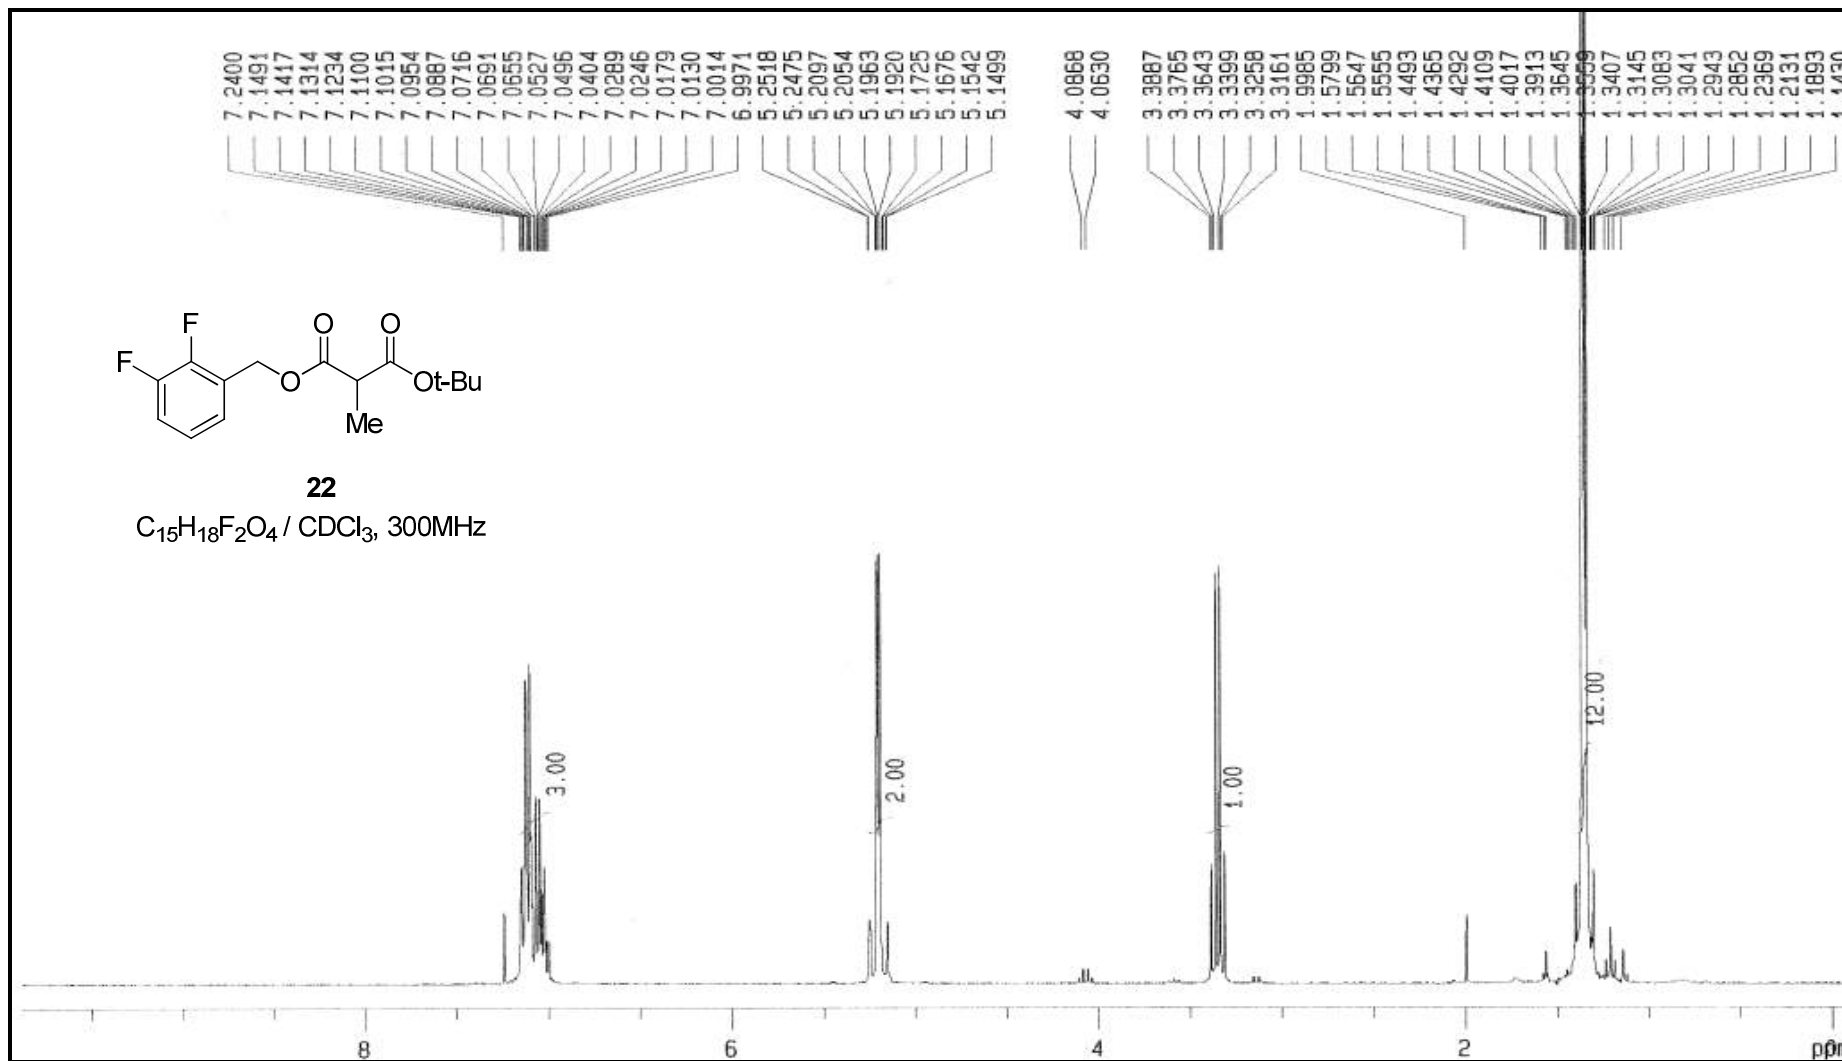



$^{13}\text{C}$ -NMR of compound (**22**)

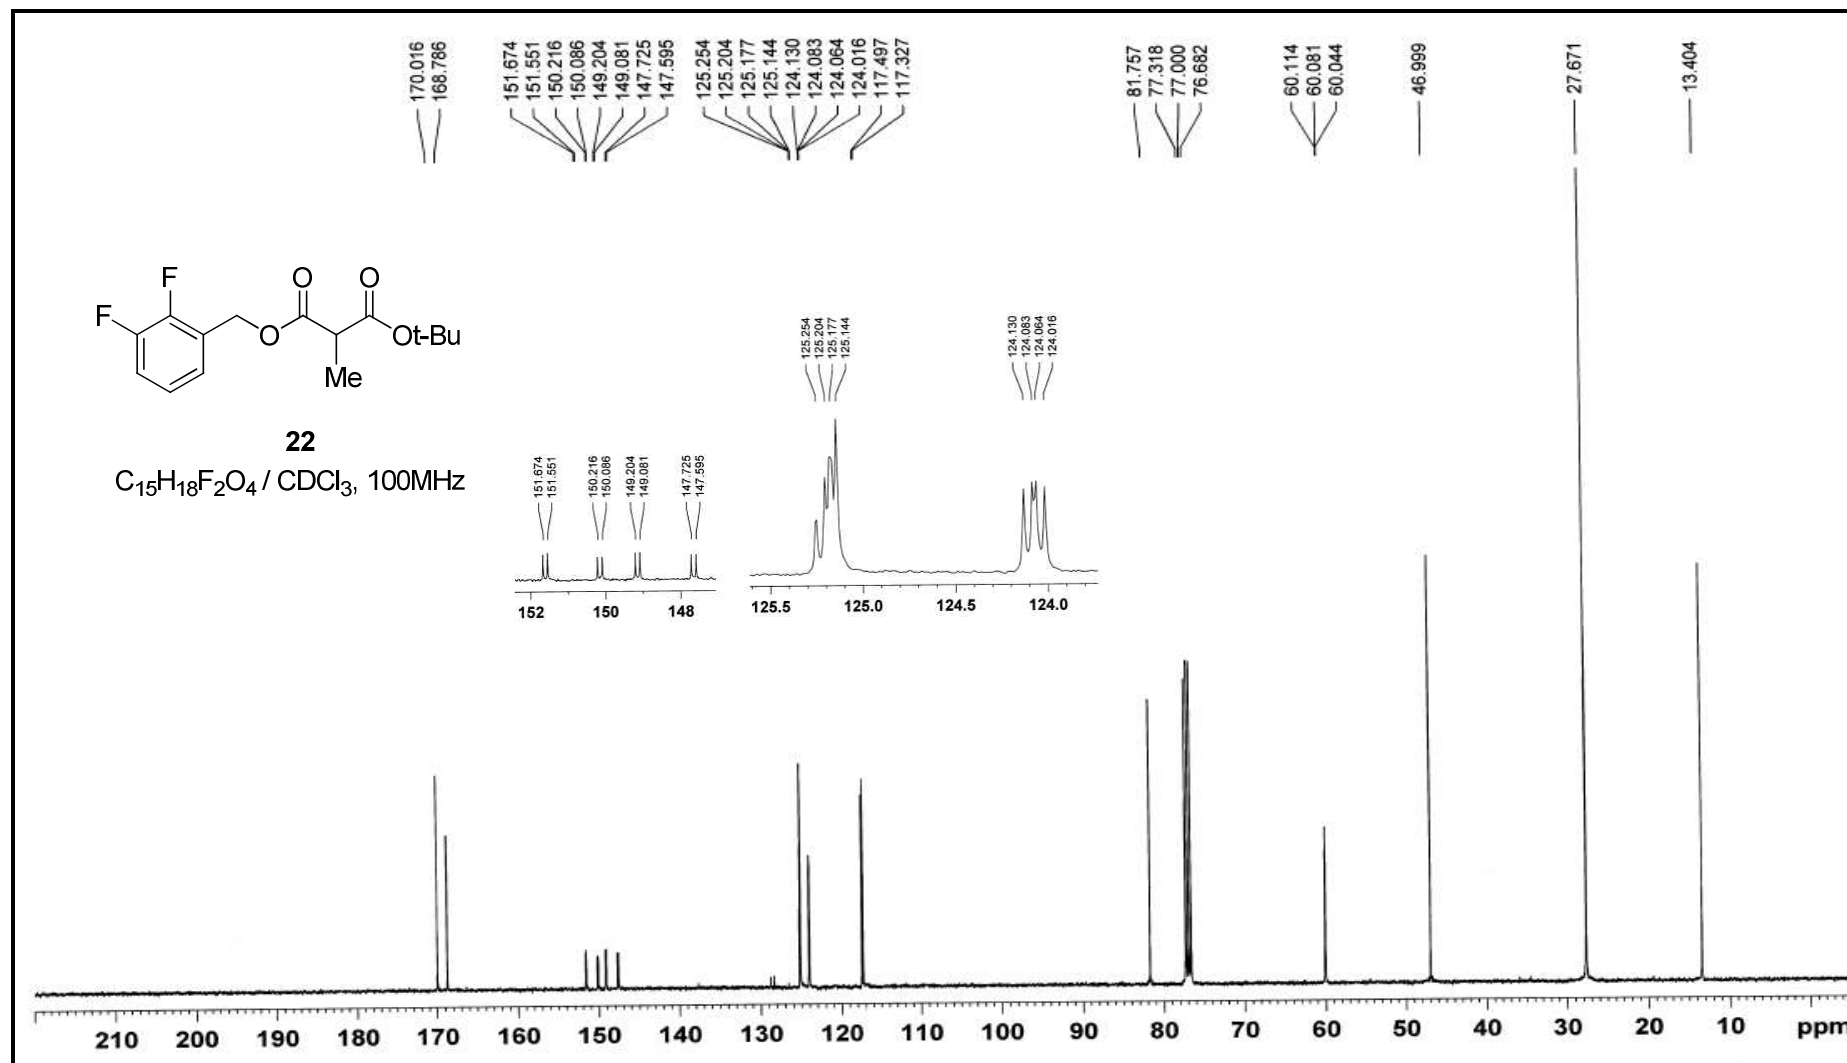

<sup>1</sup>H-NMR of compound (22c)

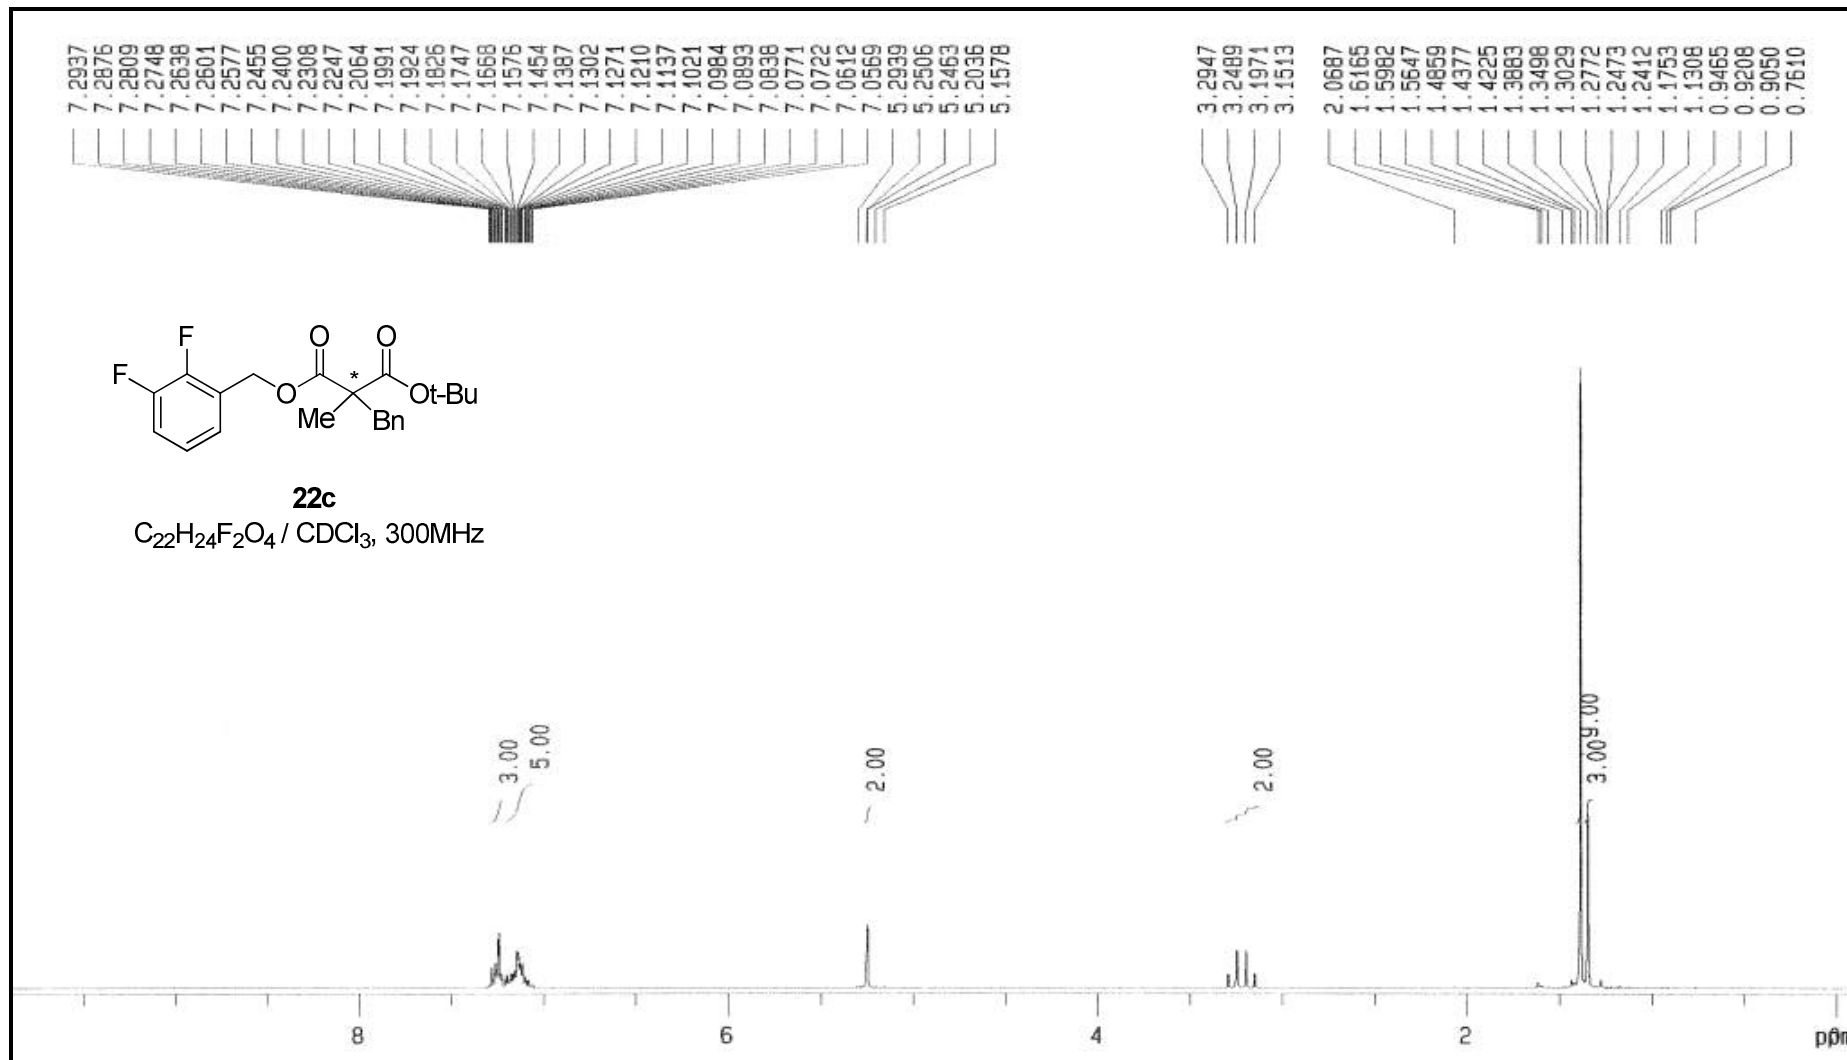

$^{13}\text{C}$ -NMR of compound (**22c**)

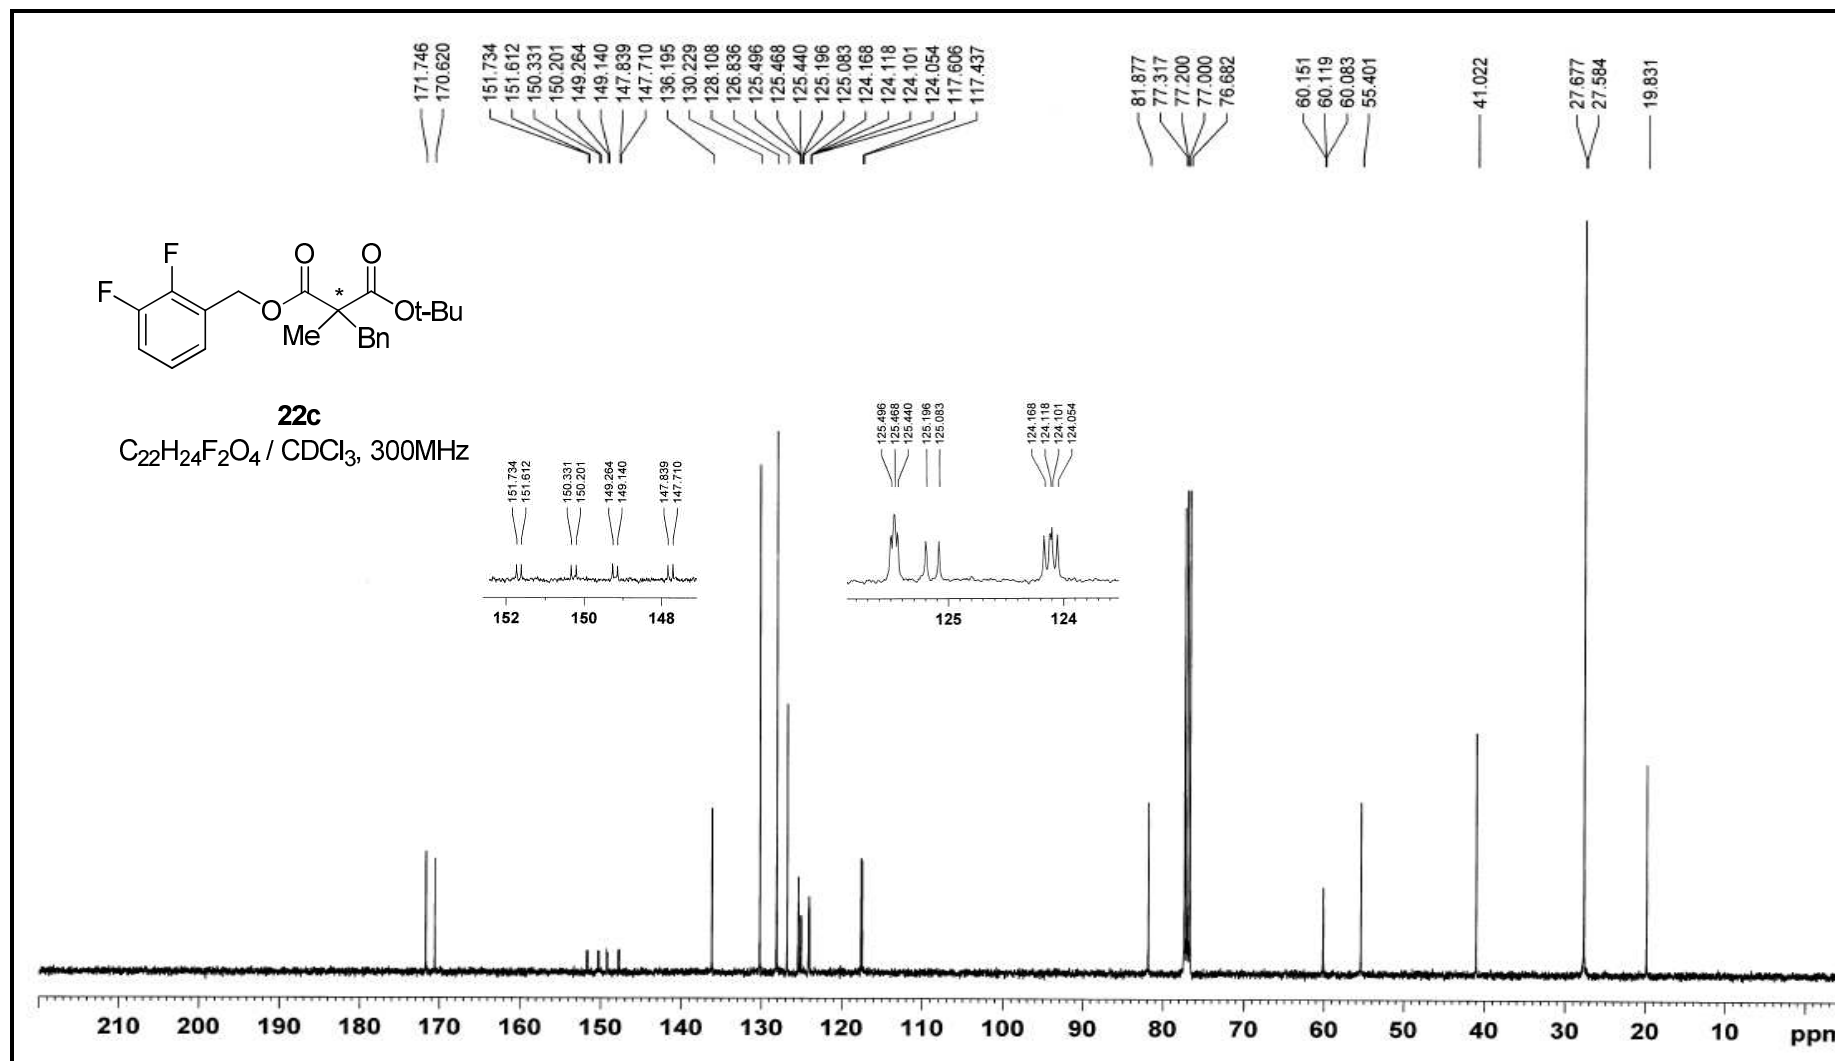

<sup>1</sup>H-NMR of compound (23)

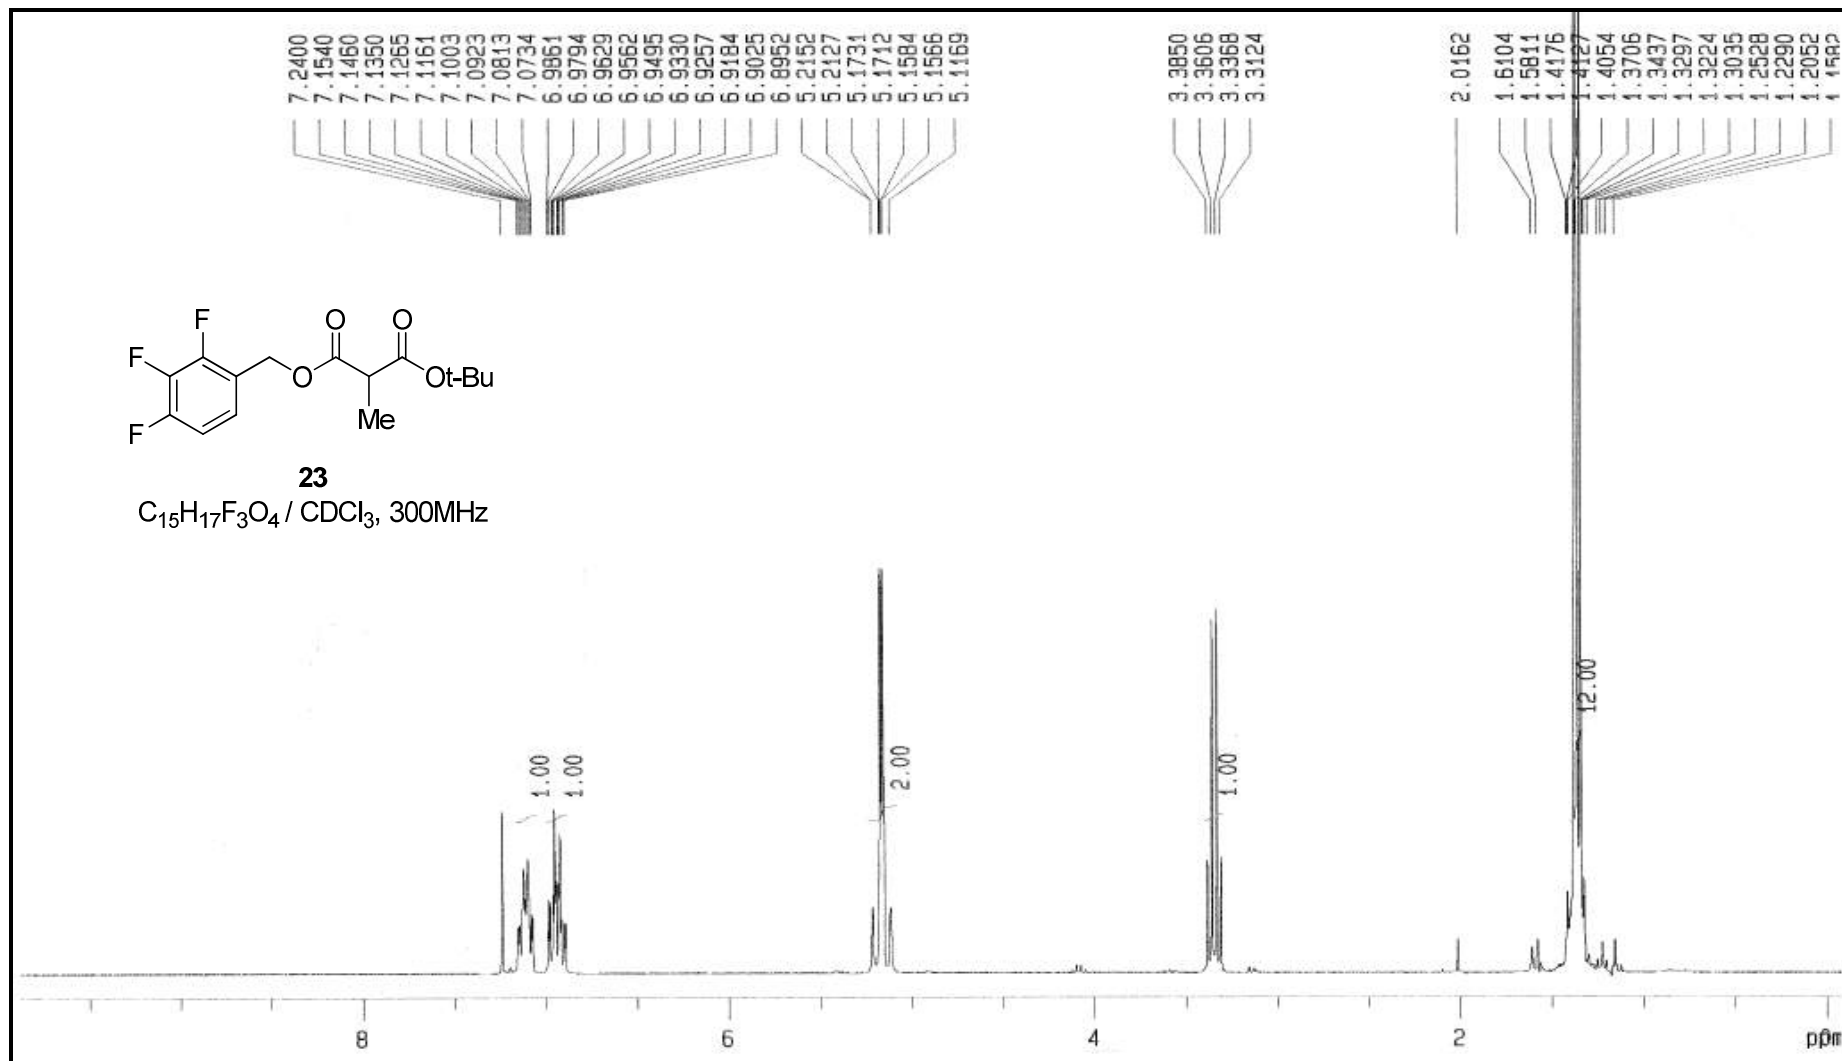

$^{13}\text{C-NMR}$  of compound (**23**)

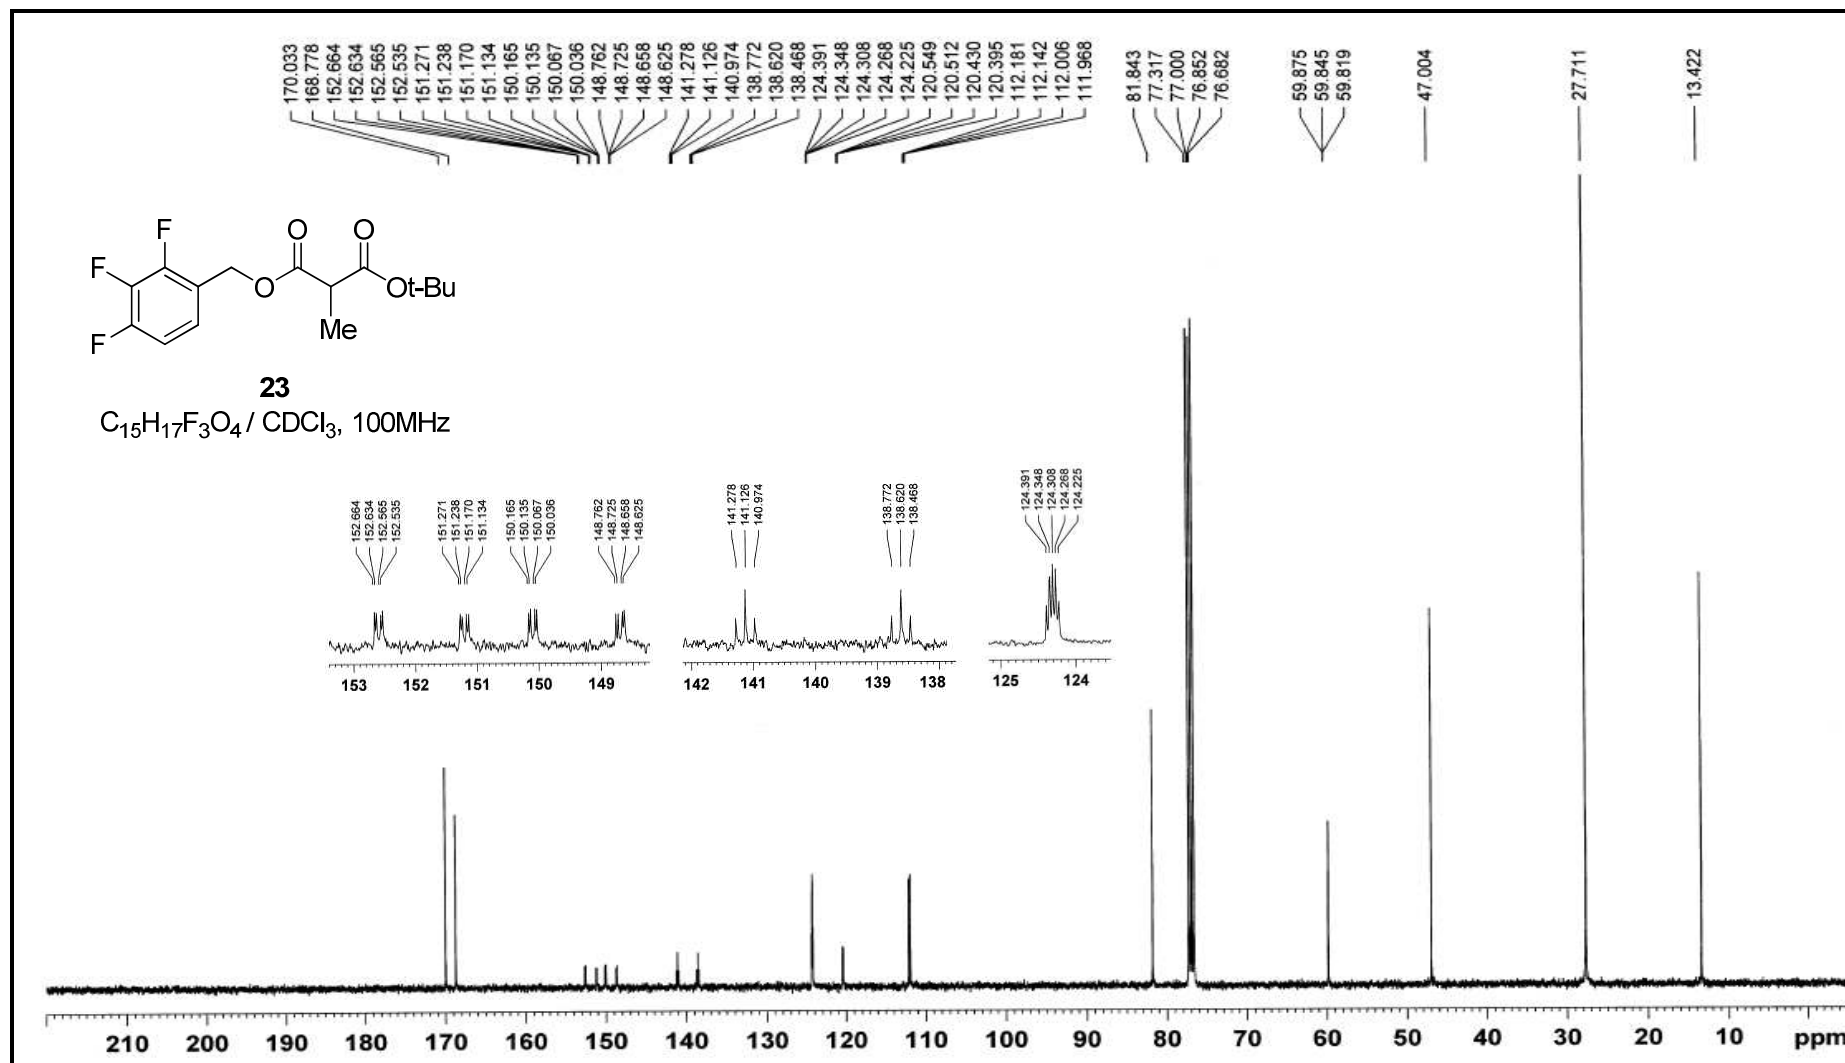

<sup>1</sup>H-NMR of compound (23c)

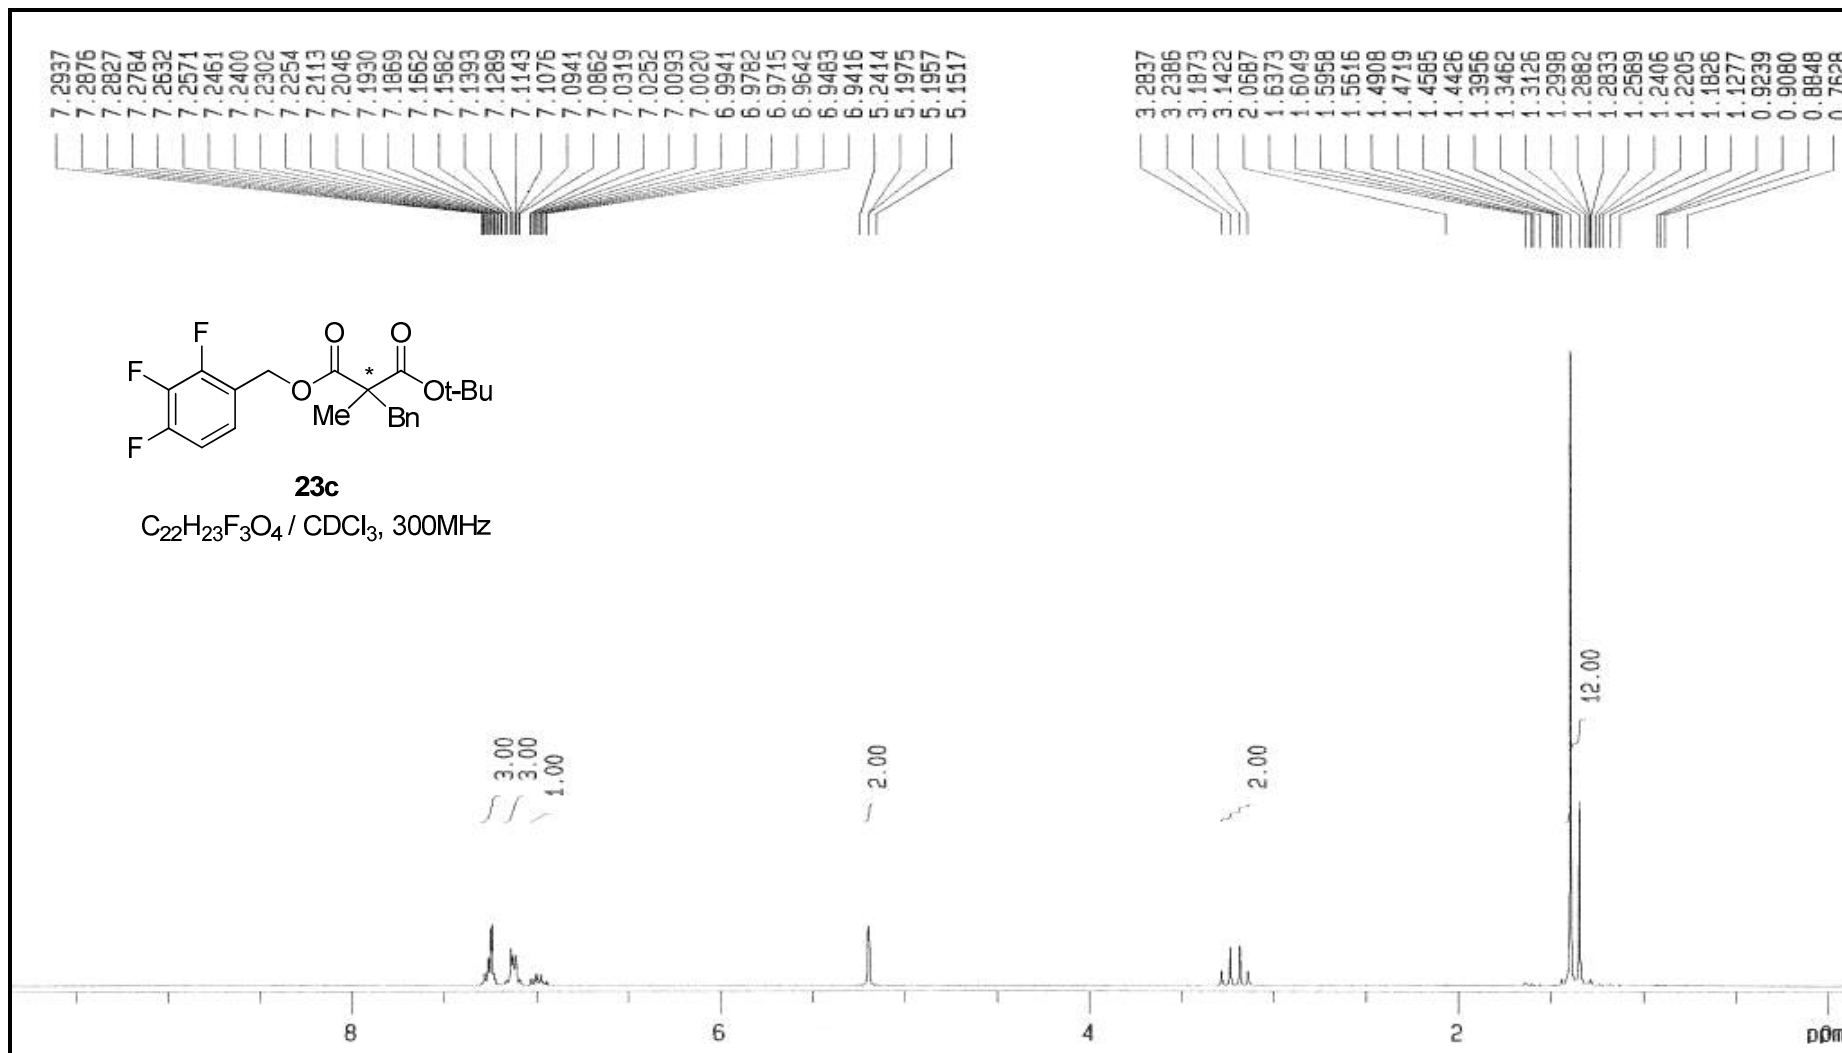

$^{13}\text{C}$ -NMR of compound (**23c**)

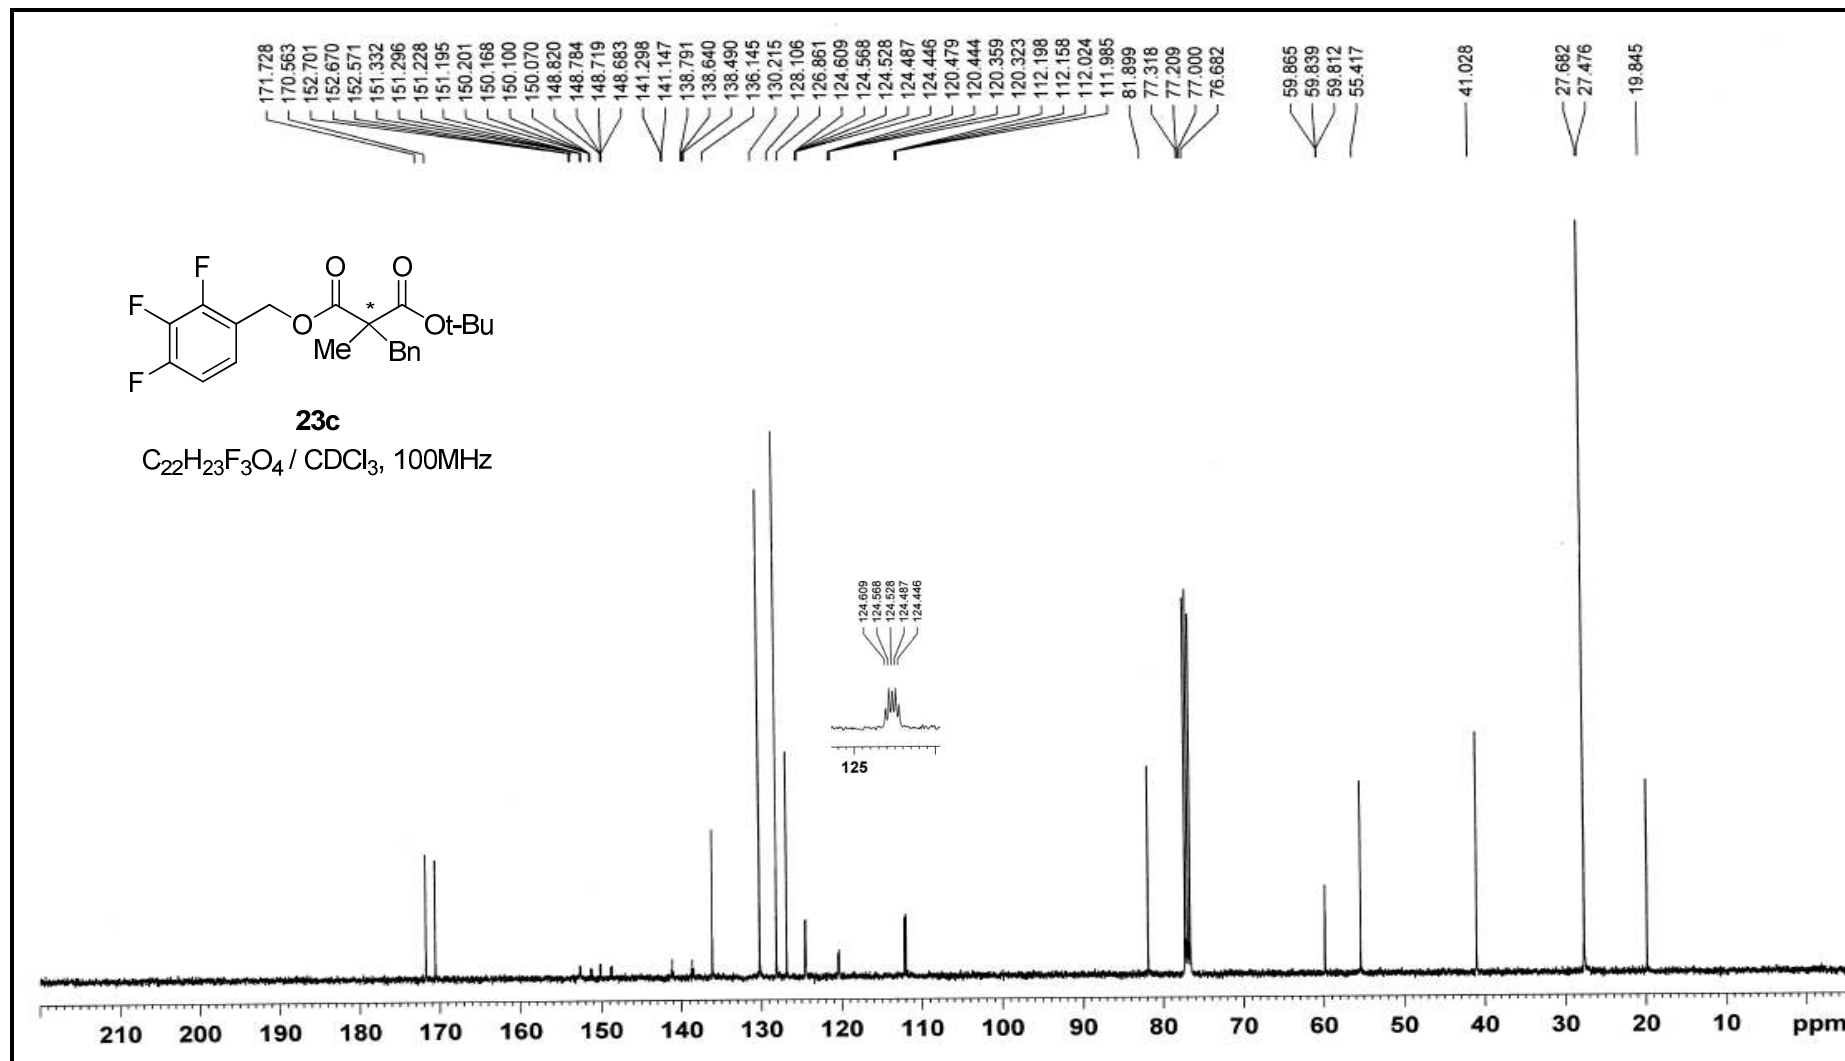

<sup>1</sup>H-NMR of compound (24)

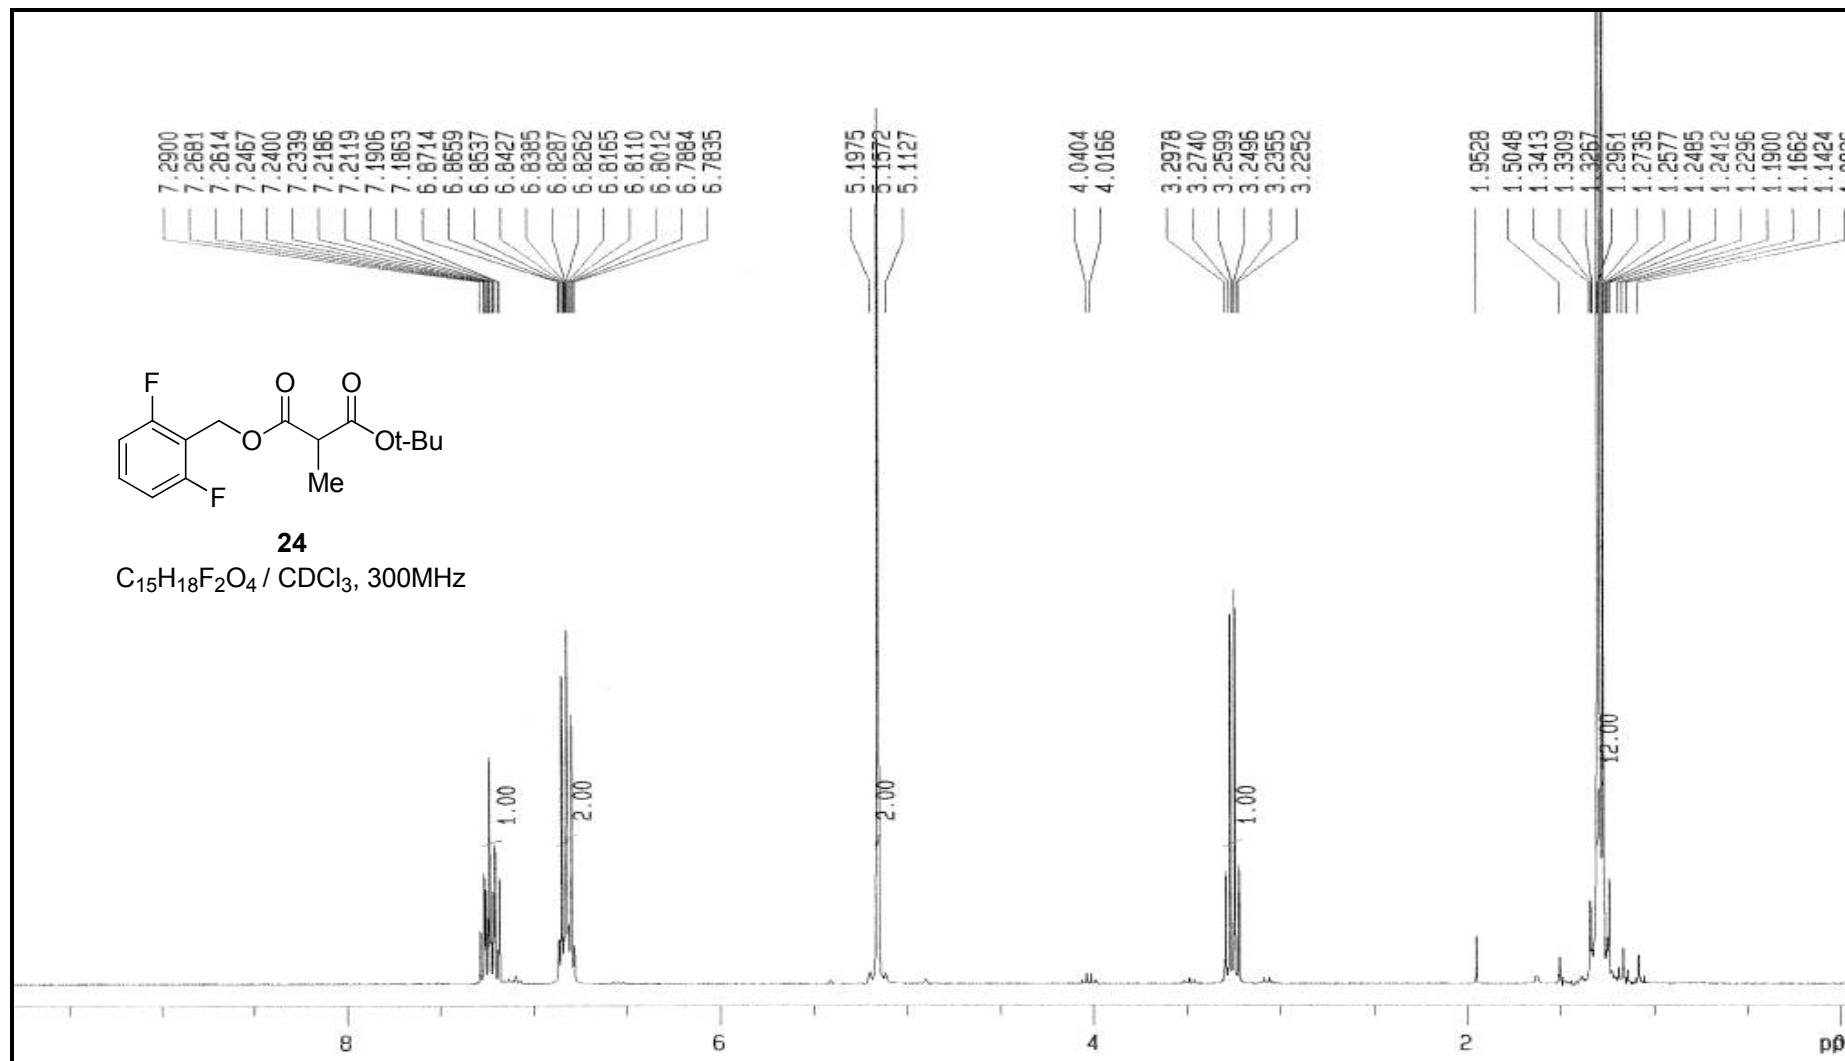



$^{13}\text{C-NMR}$  of compound (**24**)

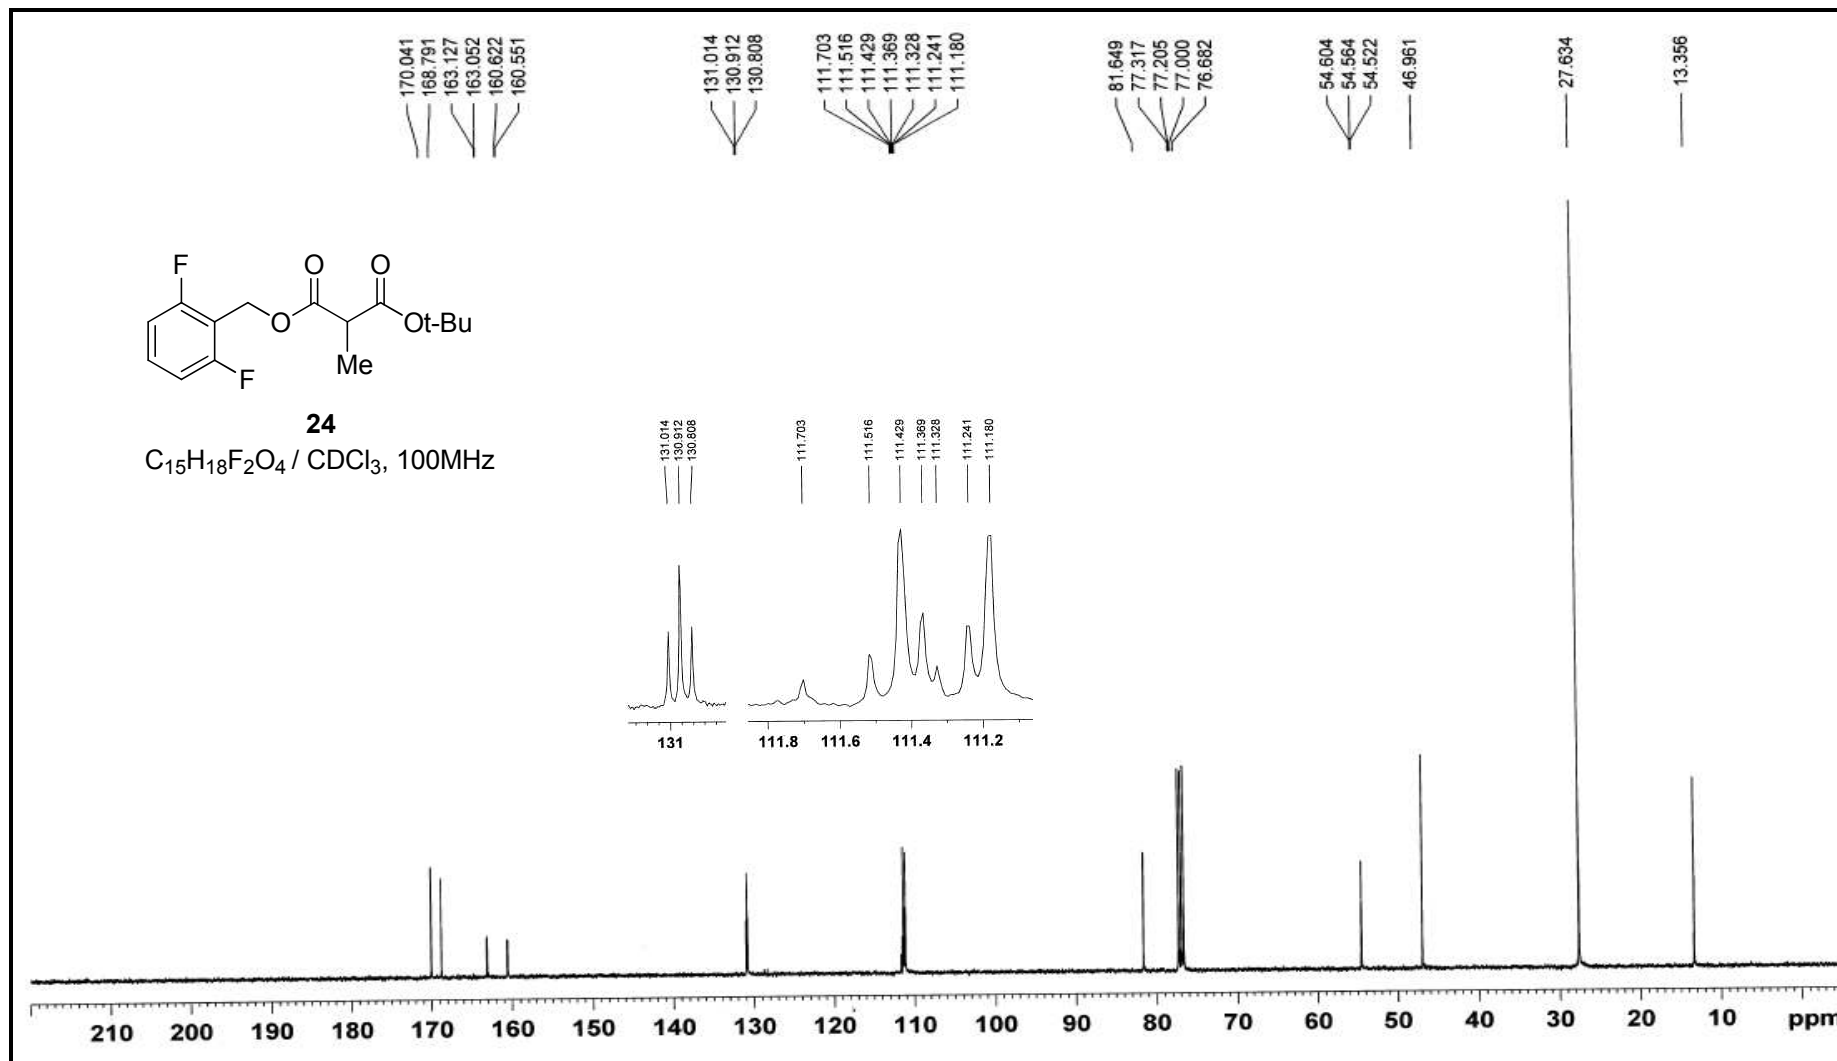

<sup>1</sup>H-NMR of compound (24c)

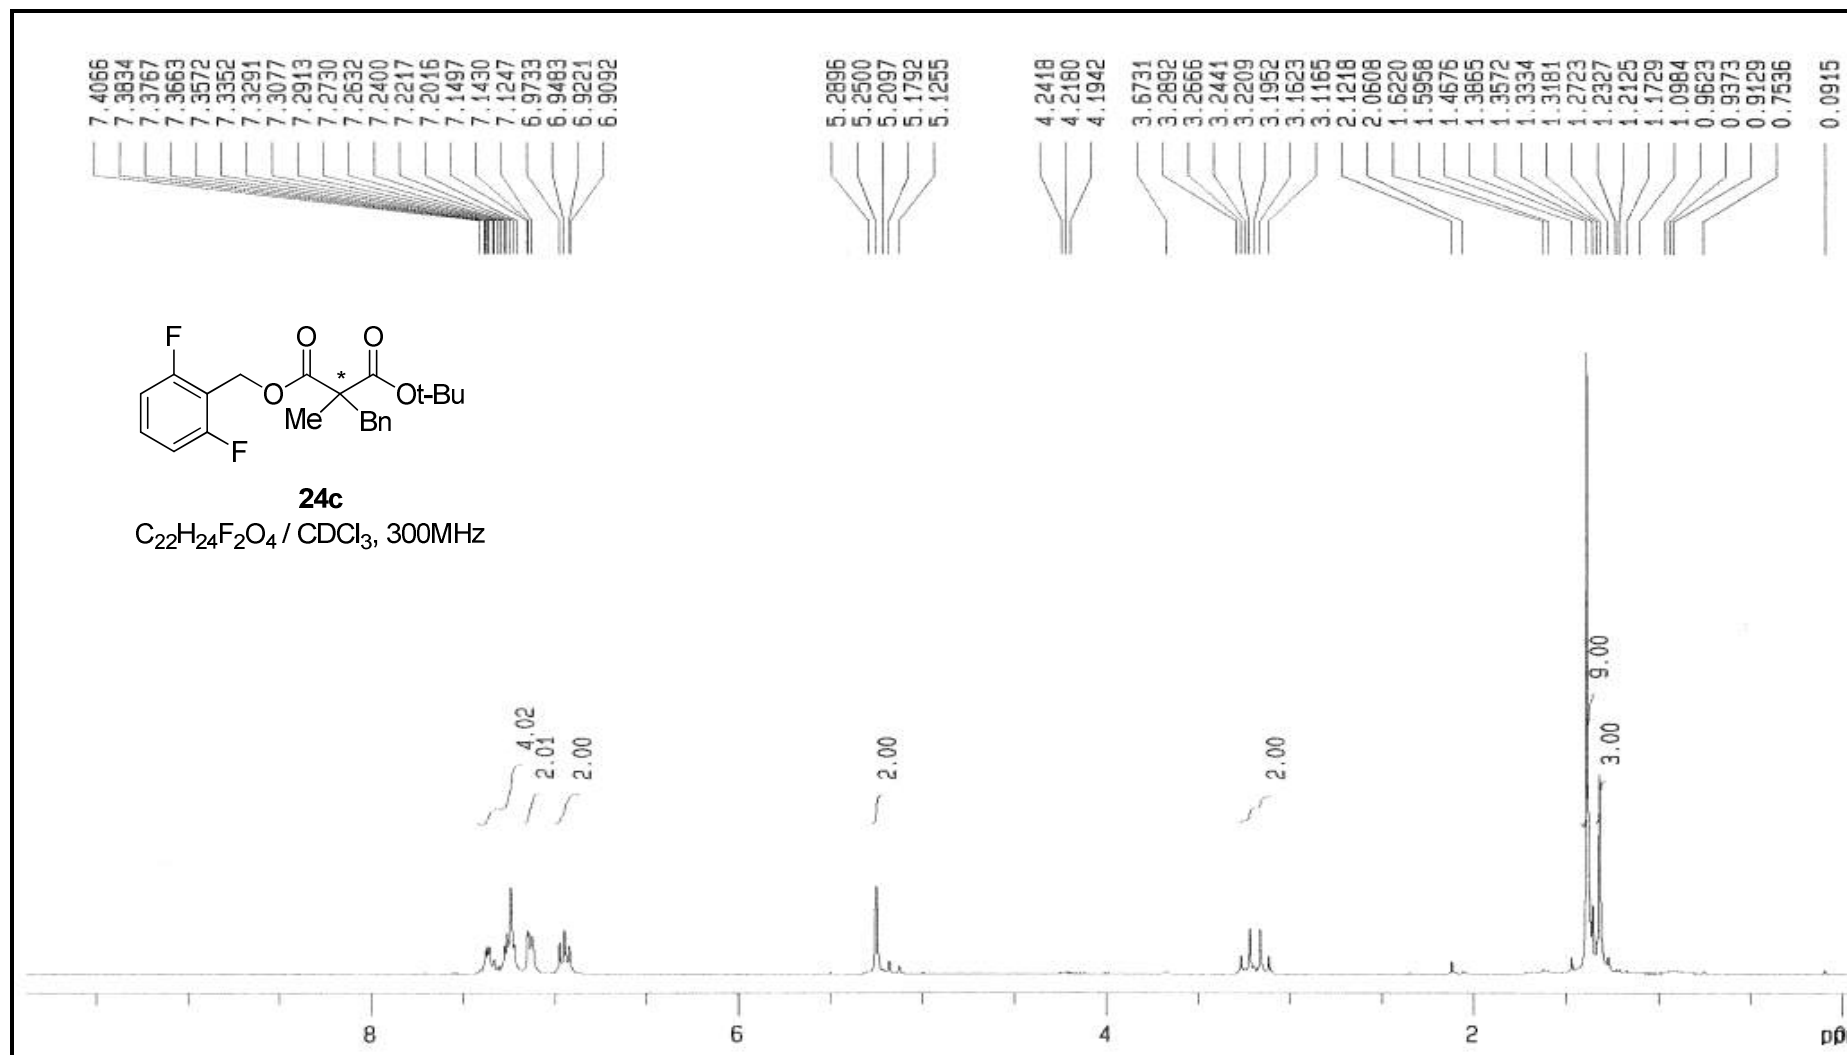

<sup>13</sup>C-NMR of compound (24c)

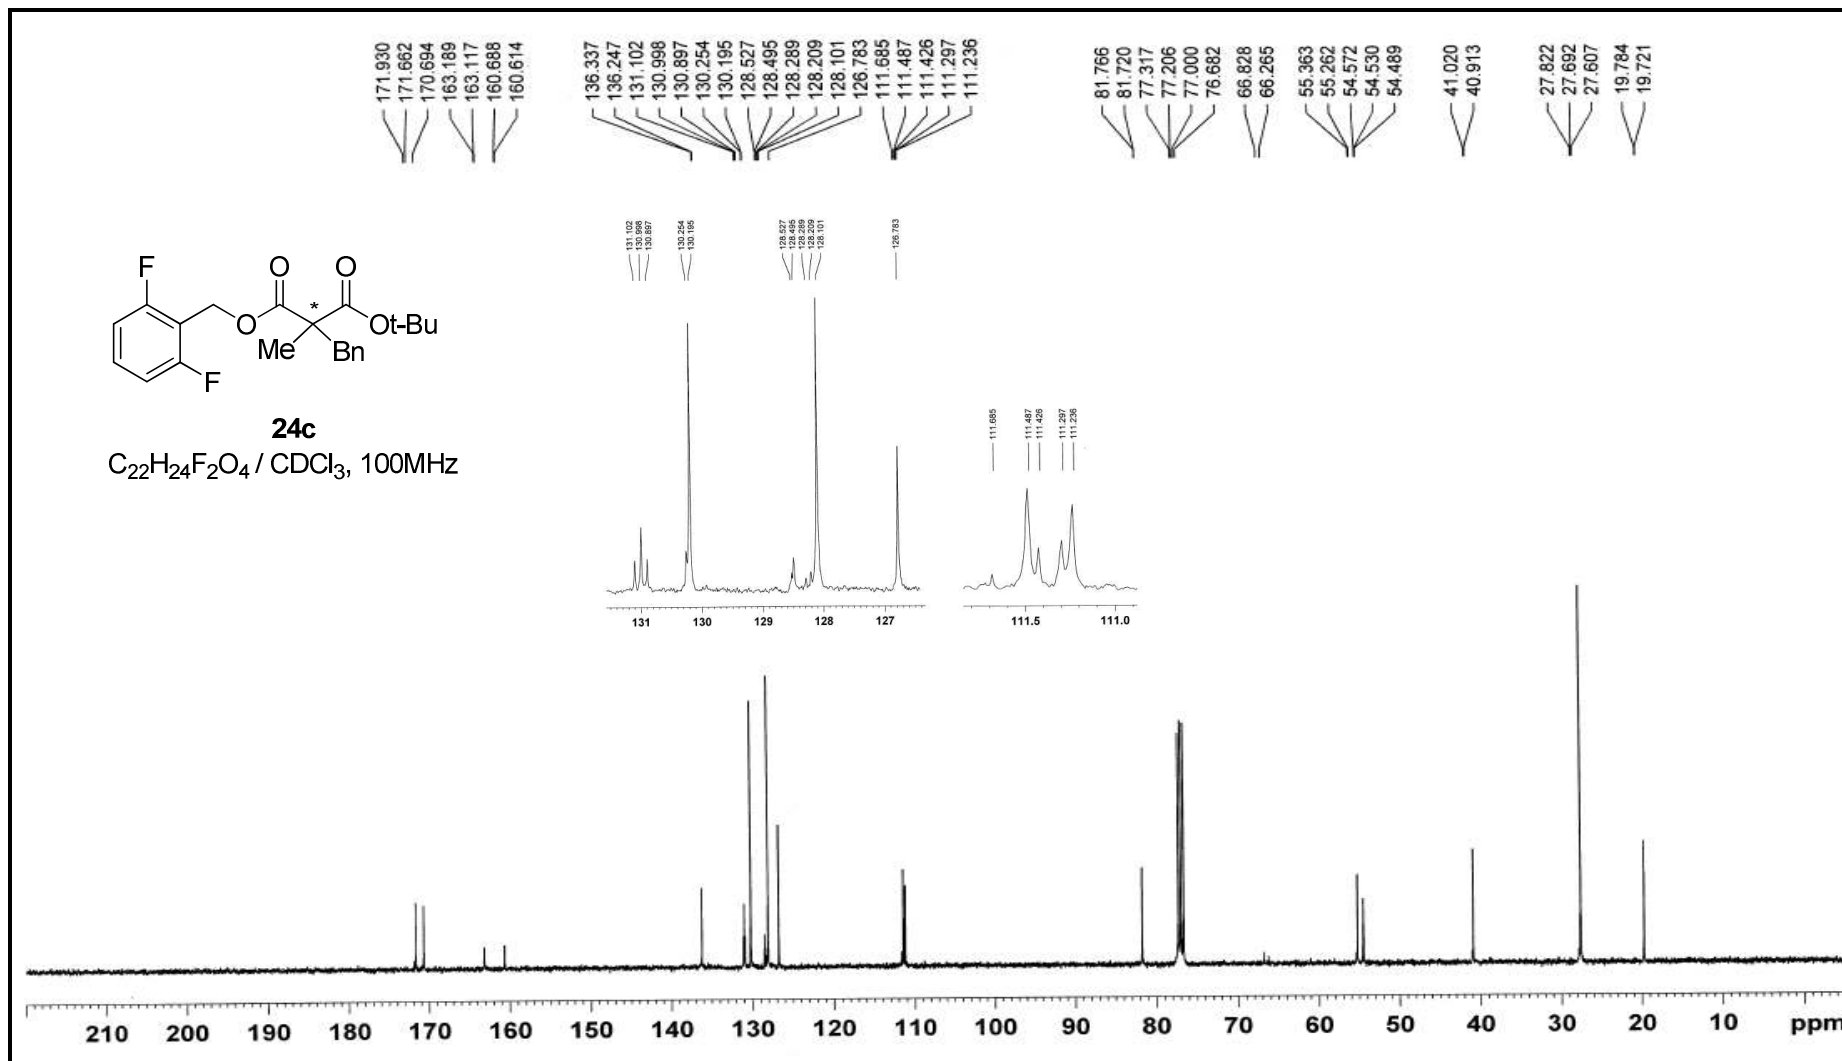

<sup>1</sup>H-NMR of compound (25)

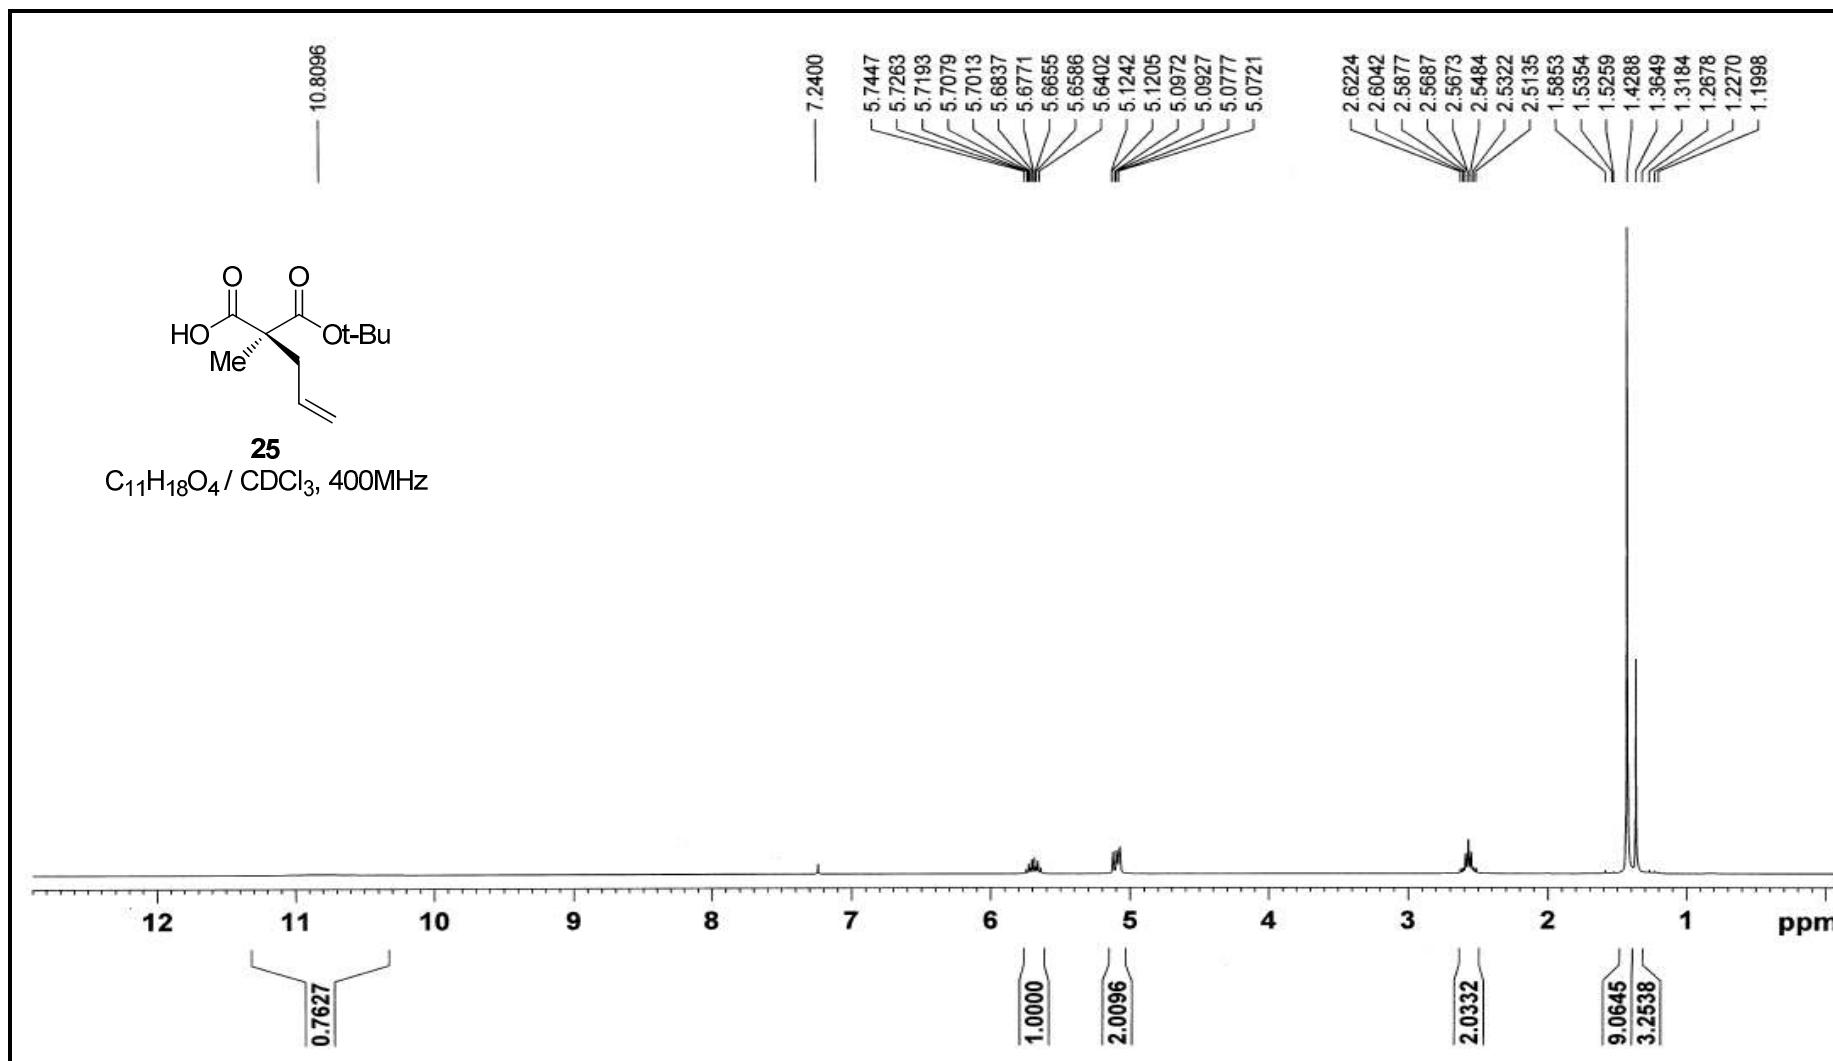

$^{13}\text{C-NMR}$  of compound (**25**)

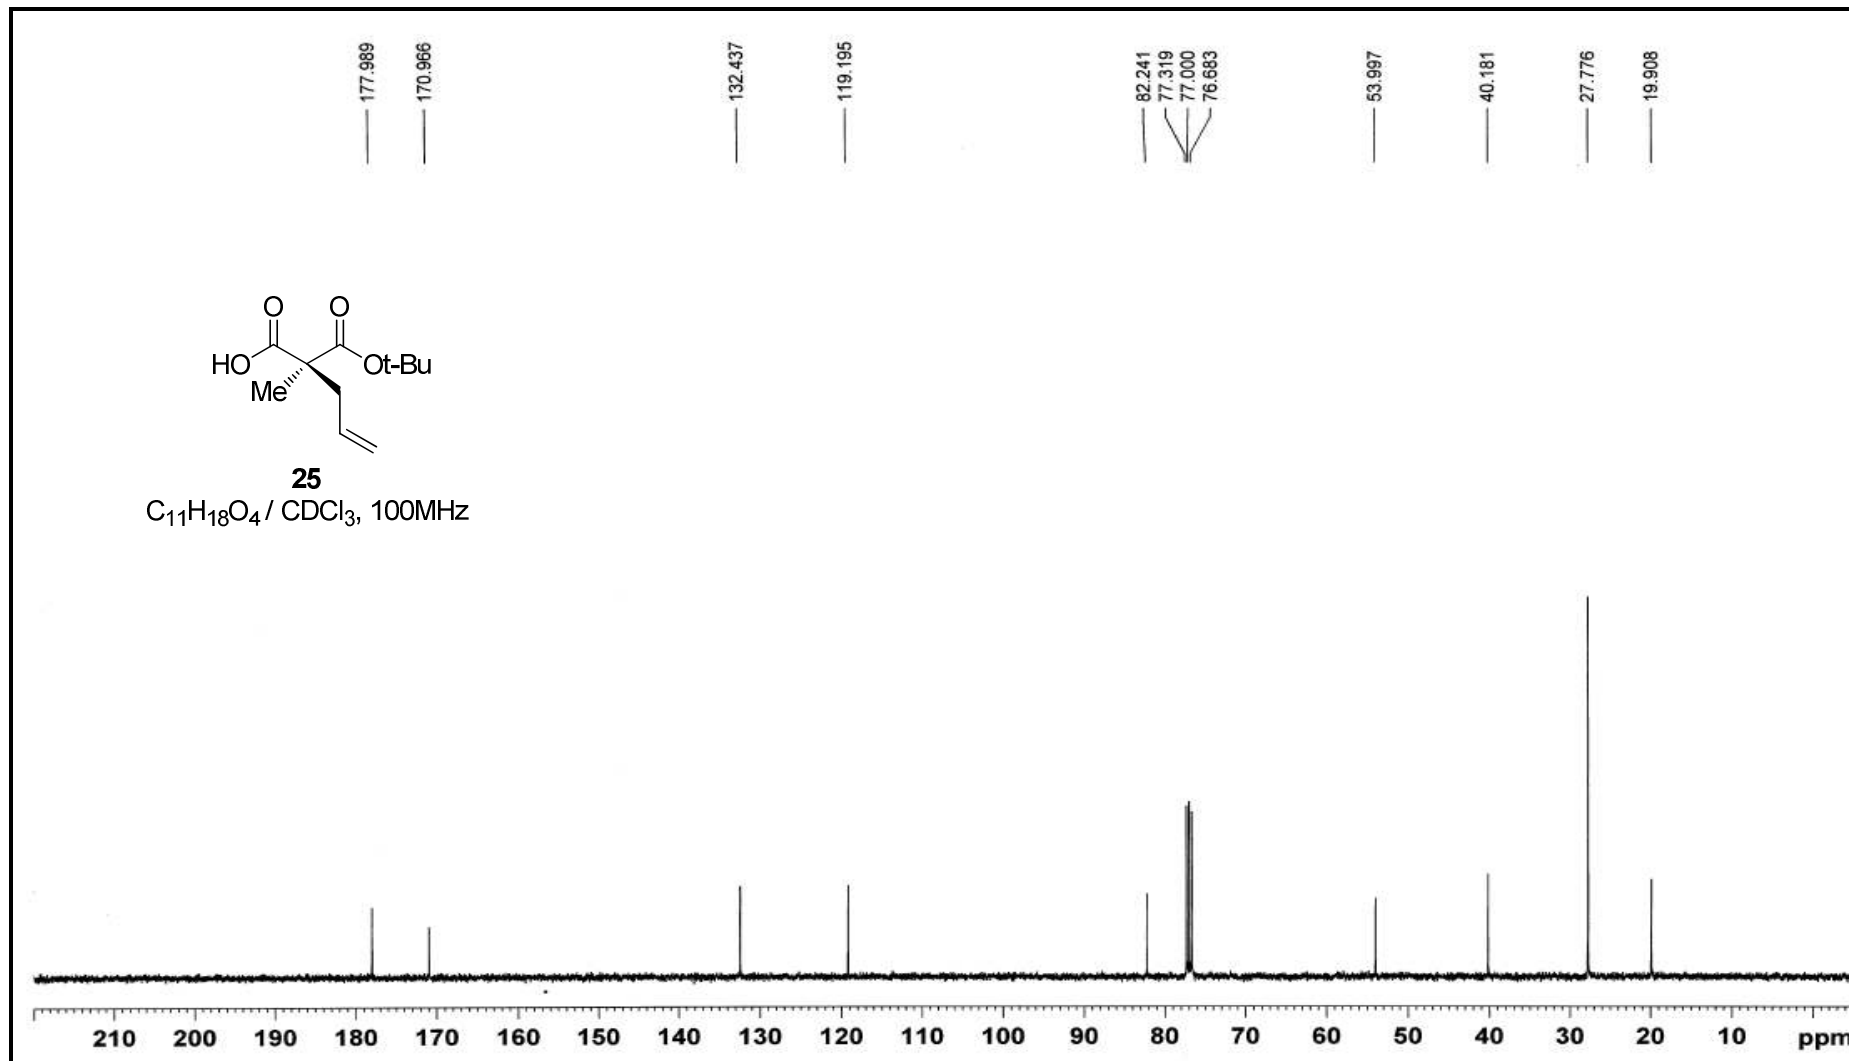

<sup>1</sup>H-NMR of compound (26)

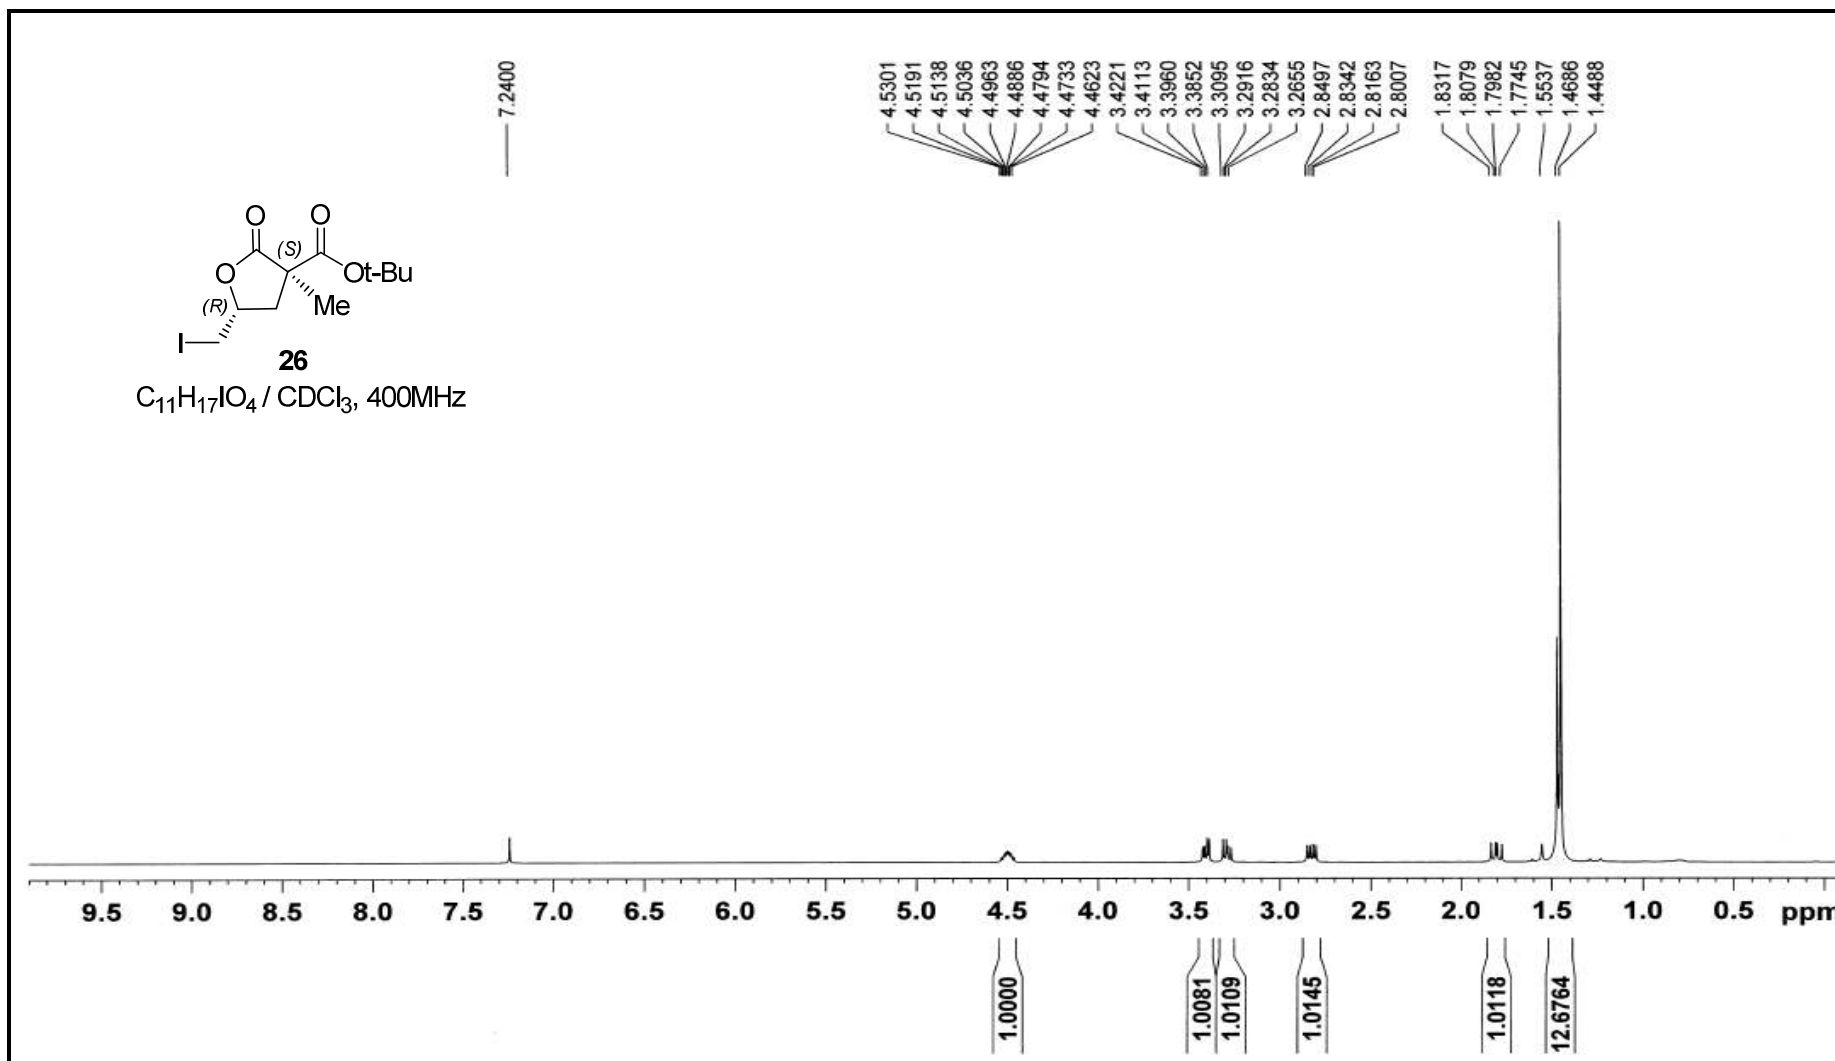

$^{13}\text{C-NMR}$  of compound (**26**)

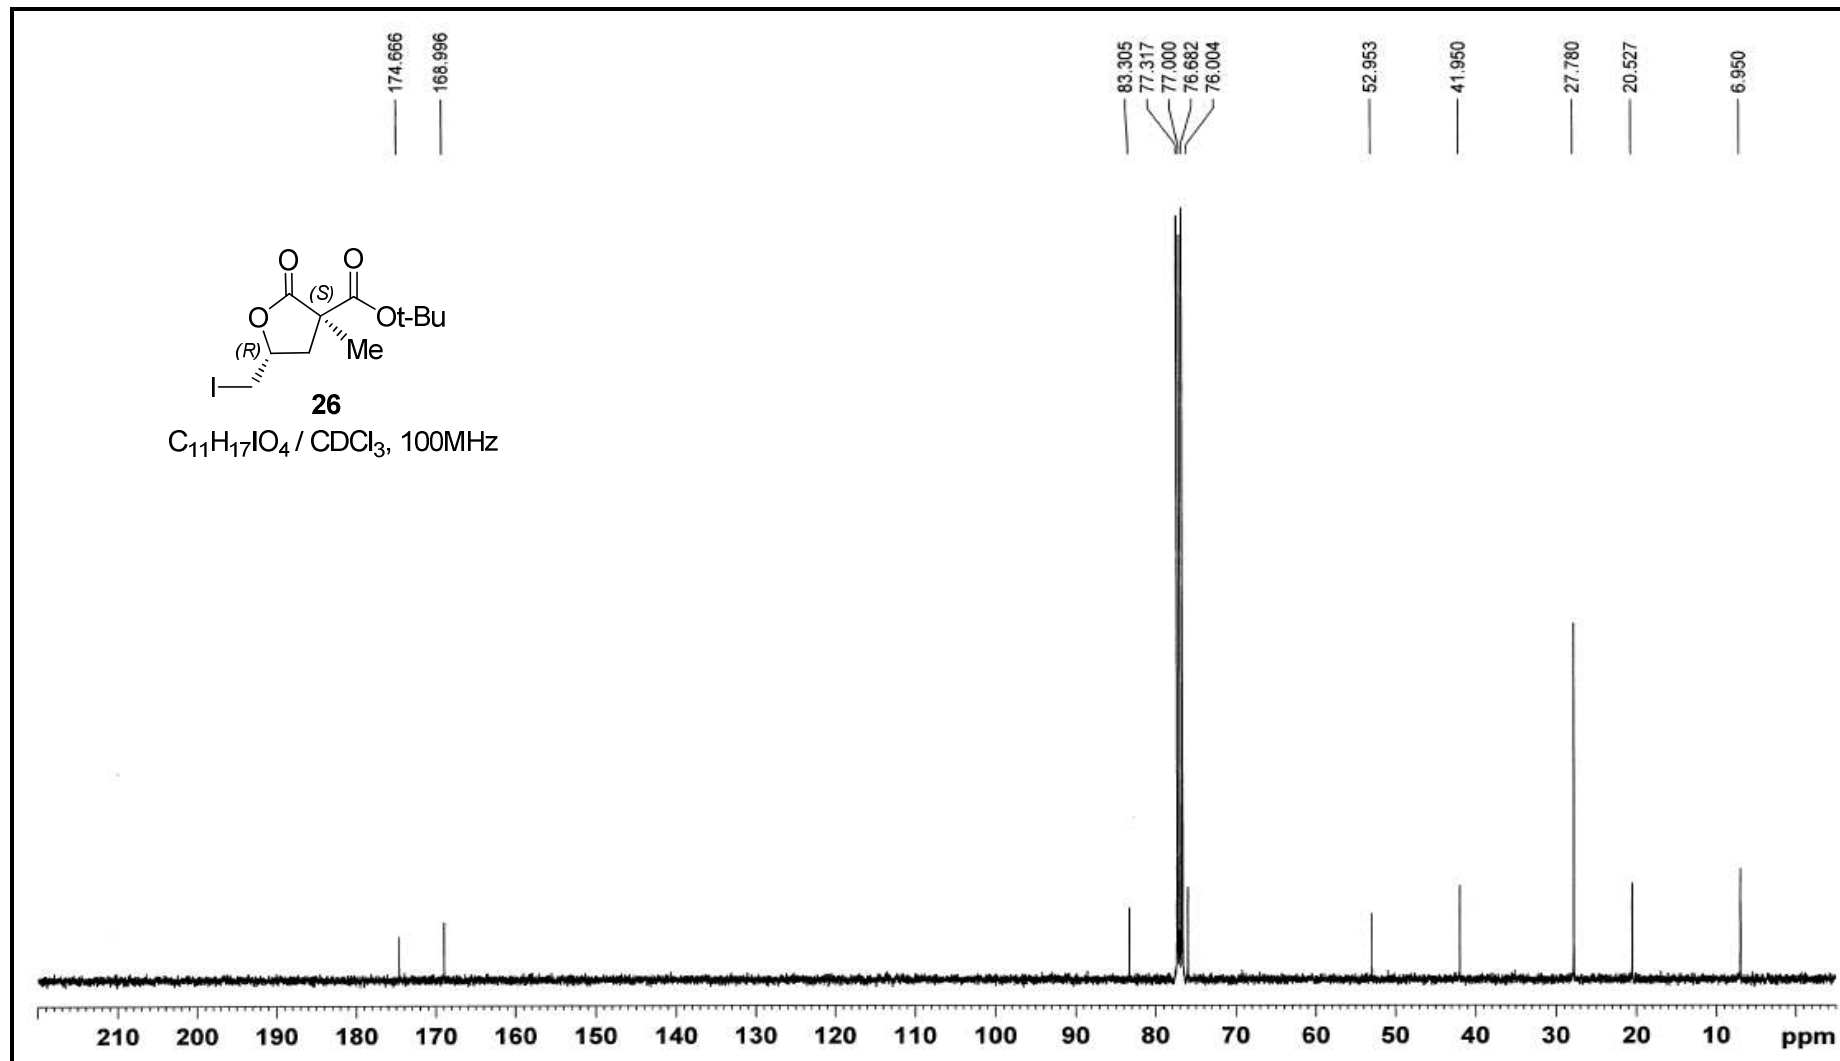

$^1\text{H-NMR}$  of compound (**27**)

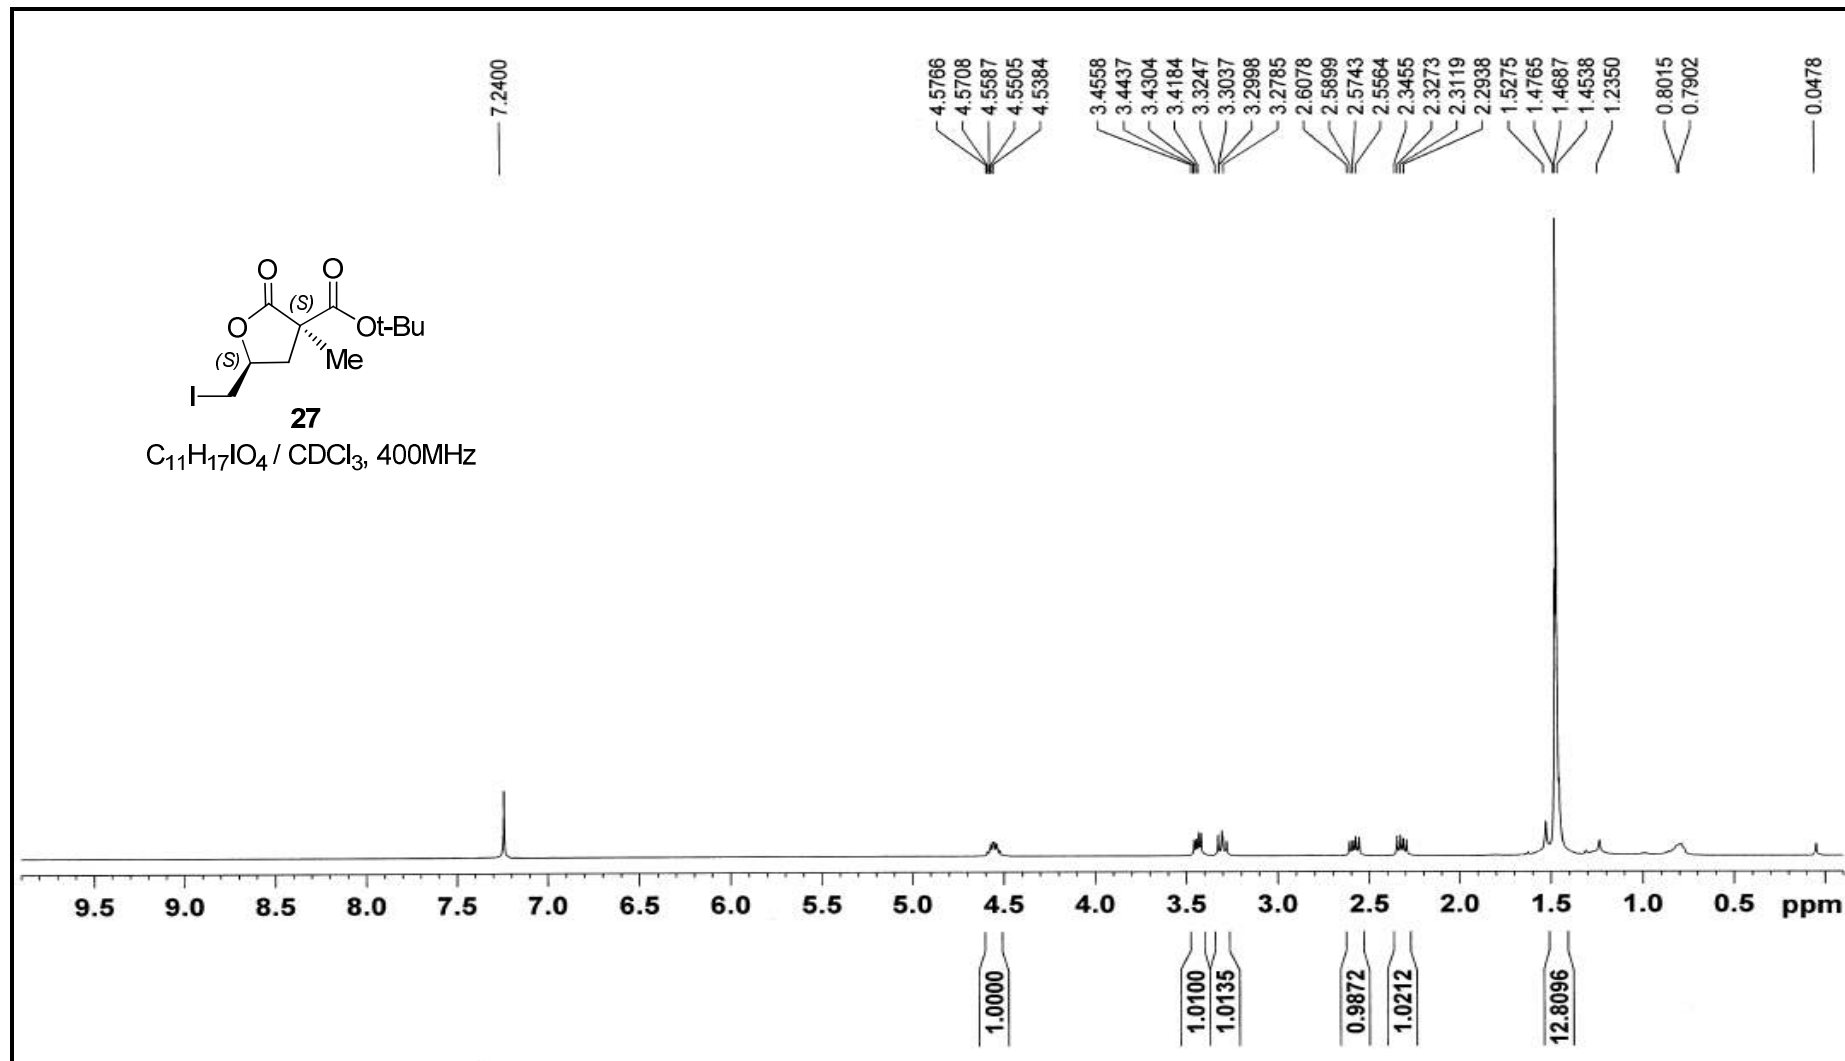



$^{13}\text{C-NMR}$  of compound (**27**)

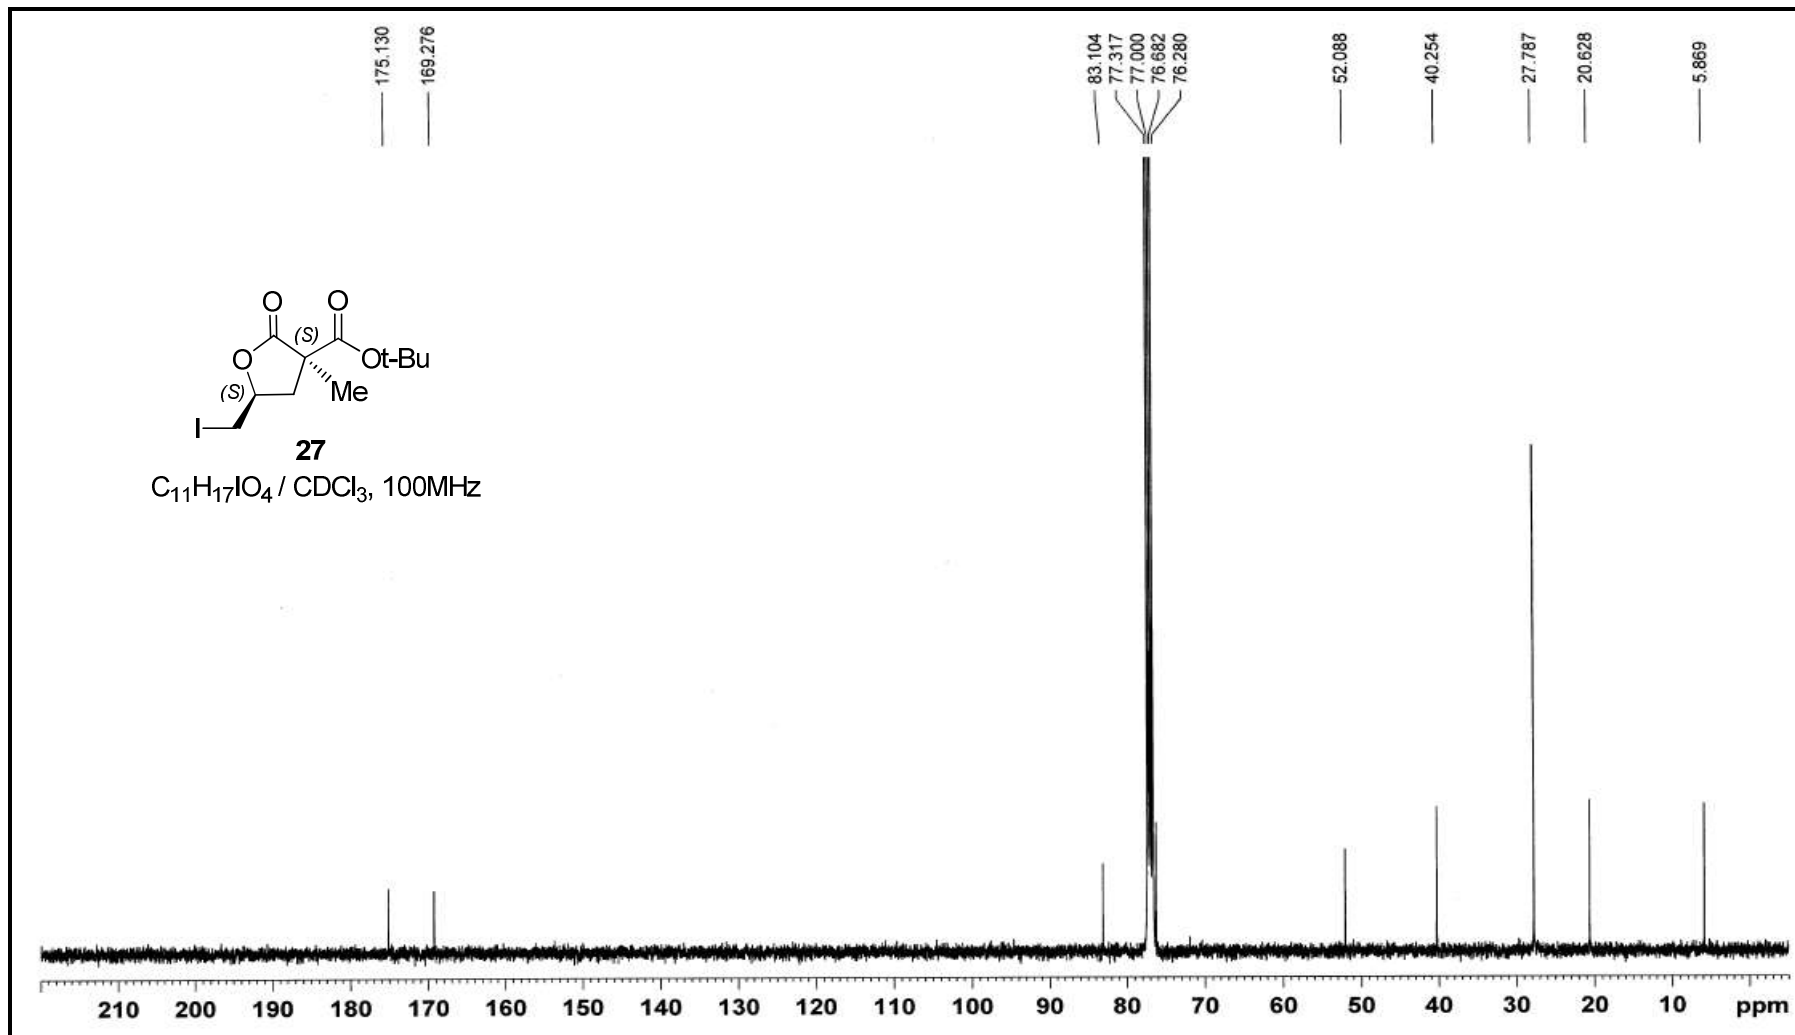

*nOe* of compound (26)

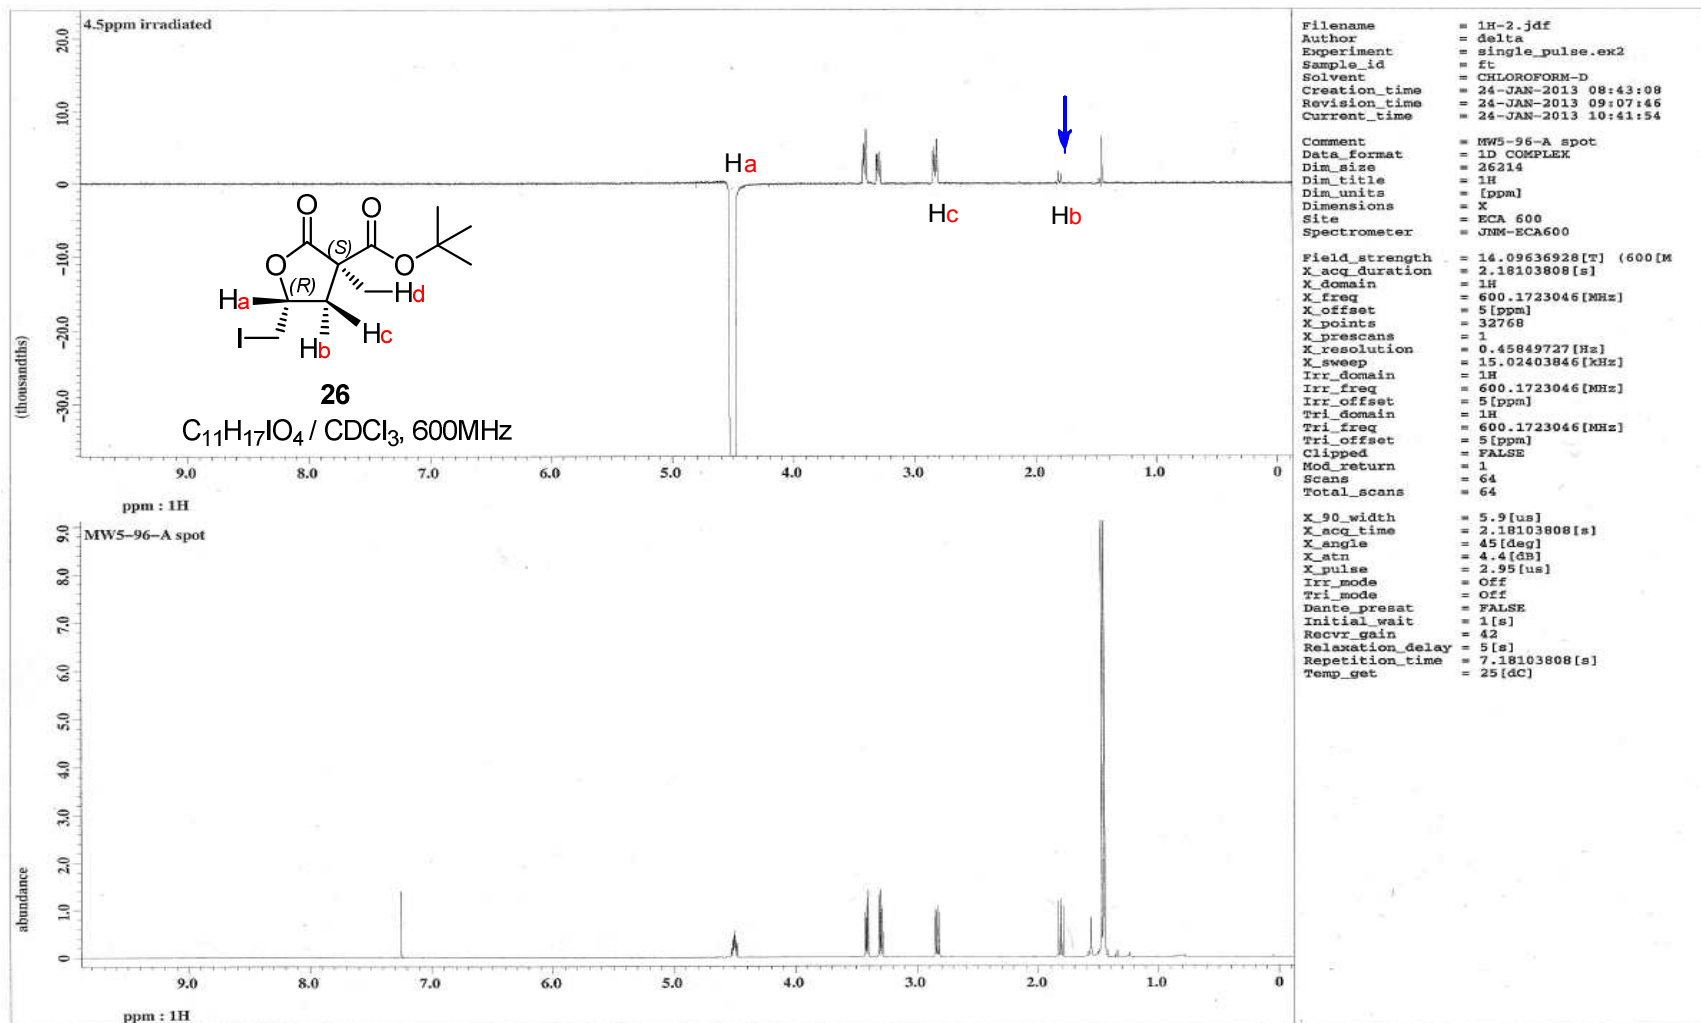

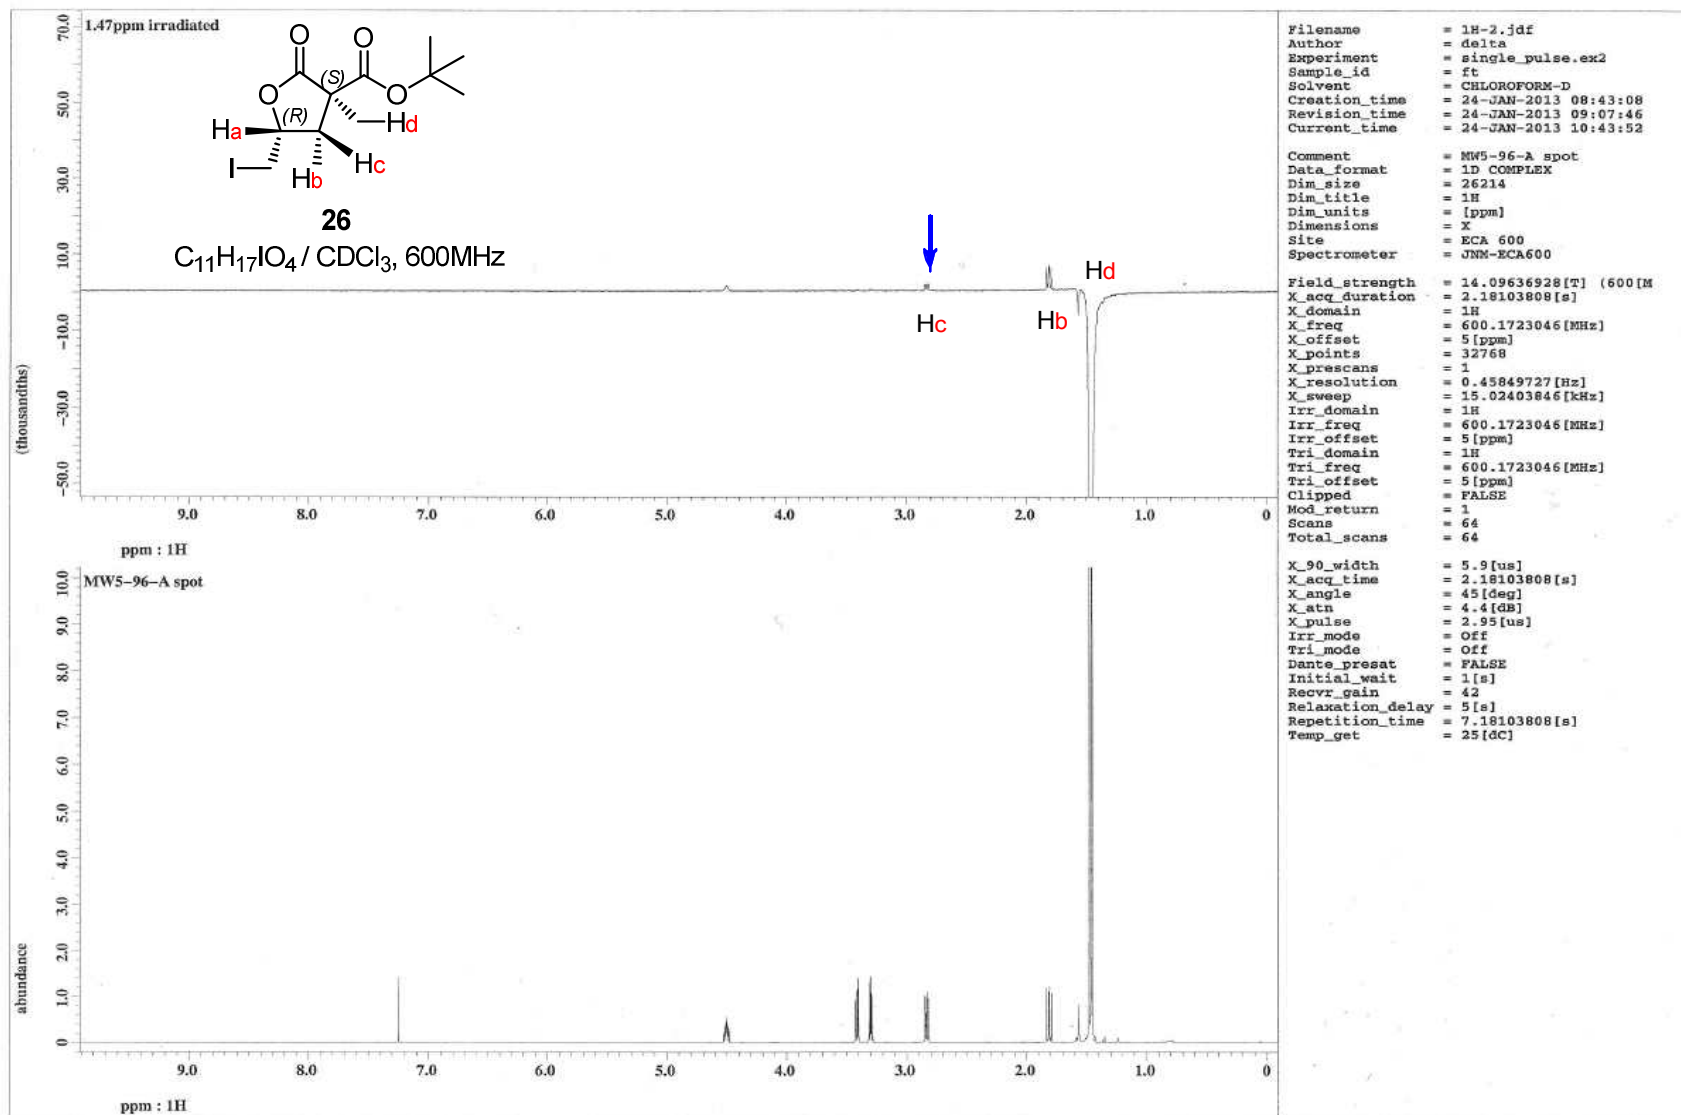

*nOe* of compound (27)

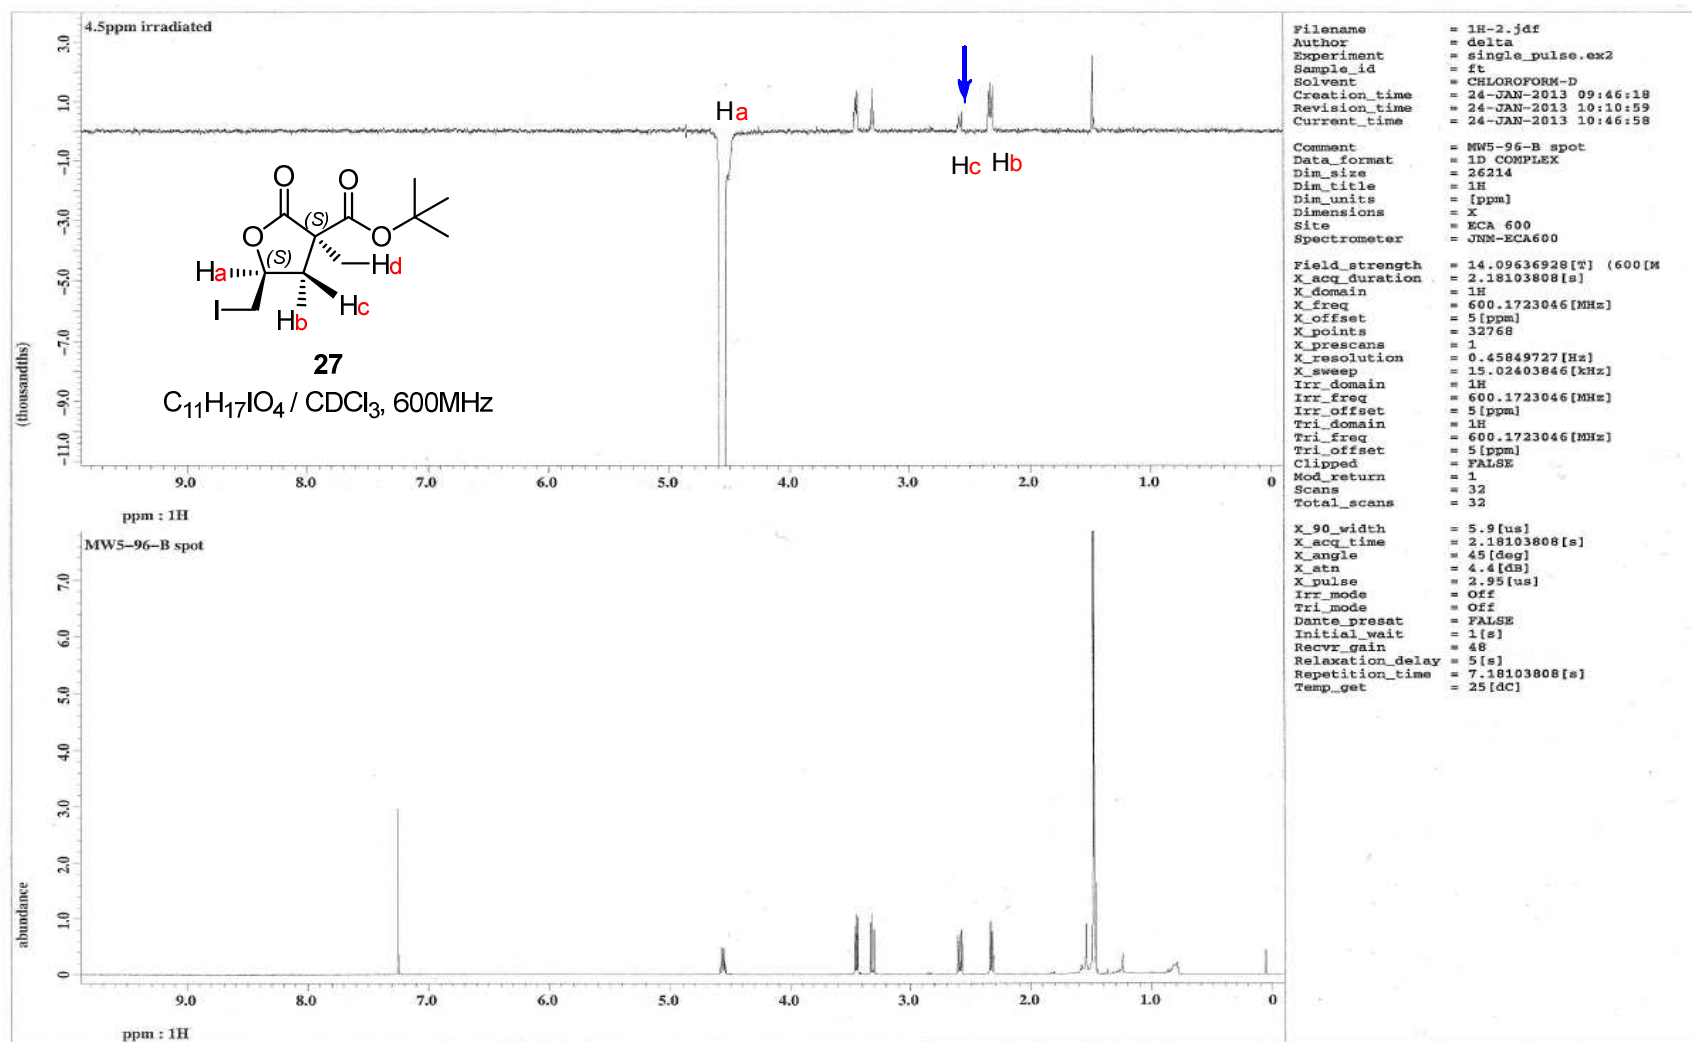

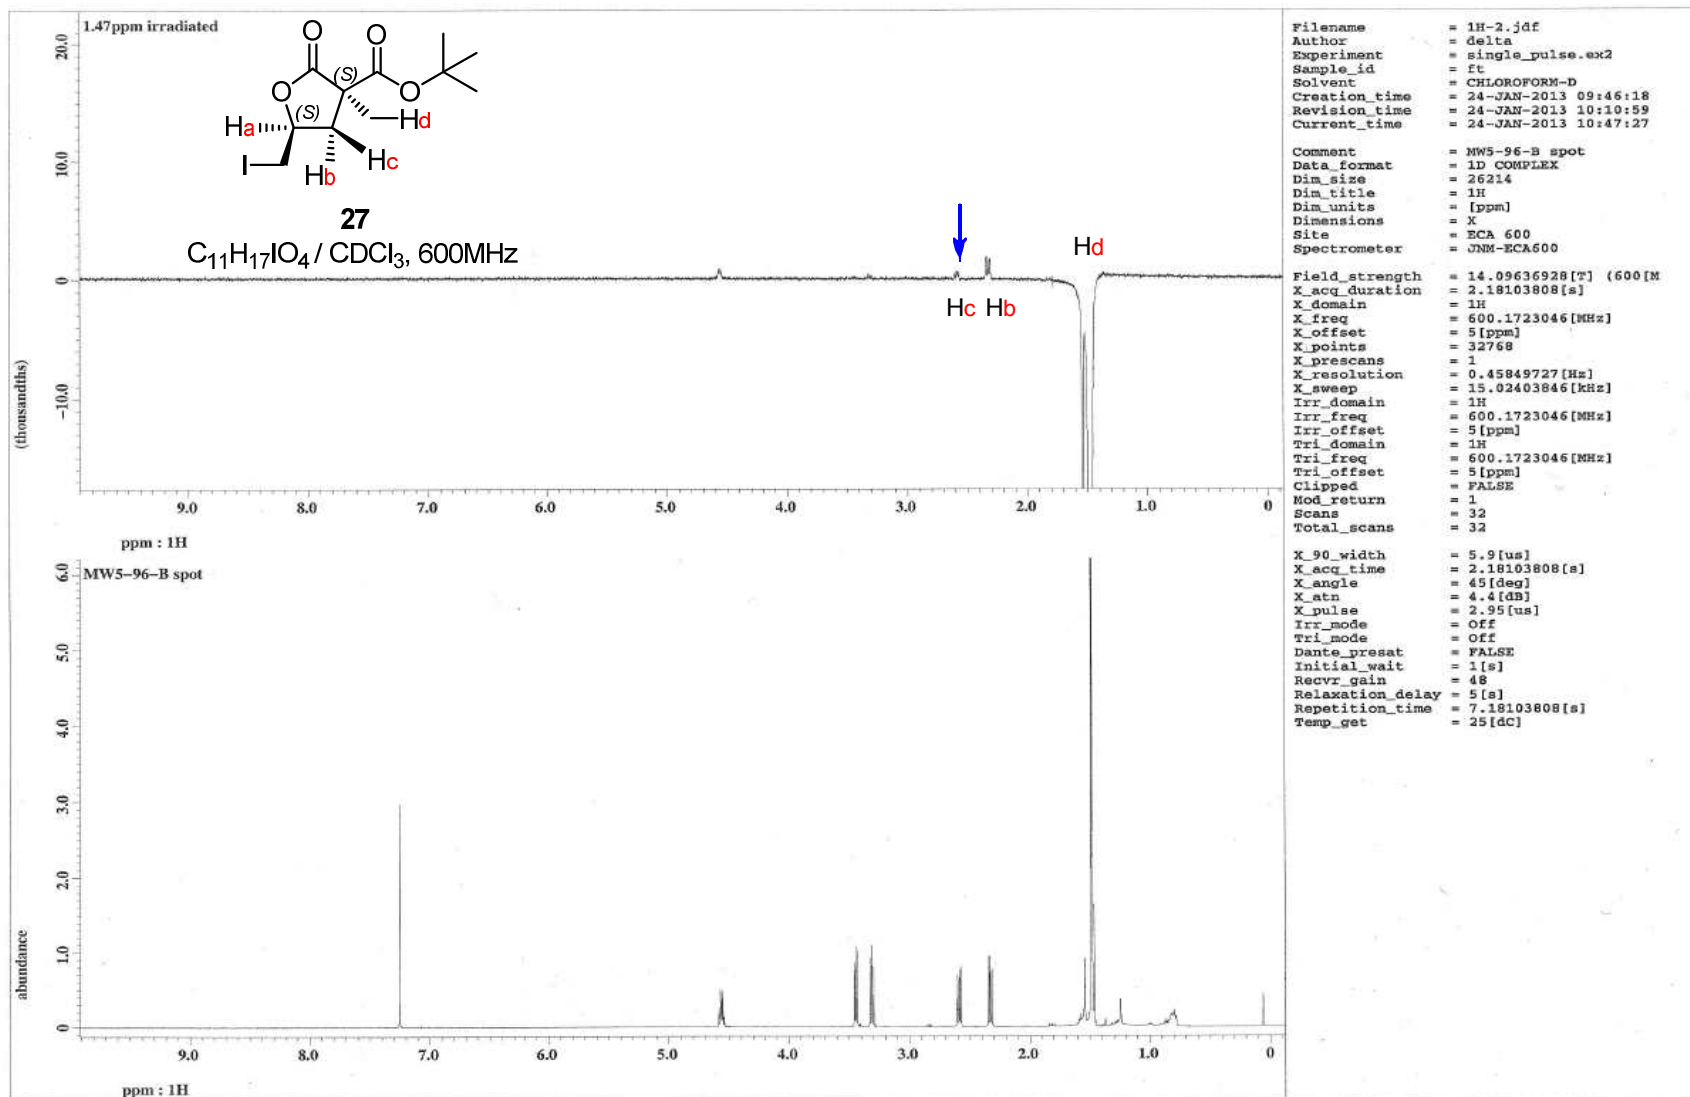

## (2) Chiral HPLC Chromatogram

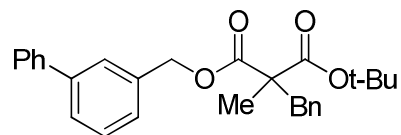

*rac-15c*

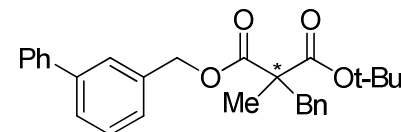

*chiral-15c*

### Area Percent Report

Instrument Name: L-2000  
 Software Version: Version LaChrom 8908800-07  
 Acquisition Method: Diacel OD-H, Hexane : 2-Propanol = 99.5 : 0.5,  
 $\lambda$  = 254nm, flow rate = 1mL/min

Sample ID: *rac-15c*

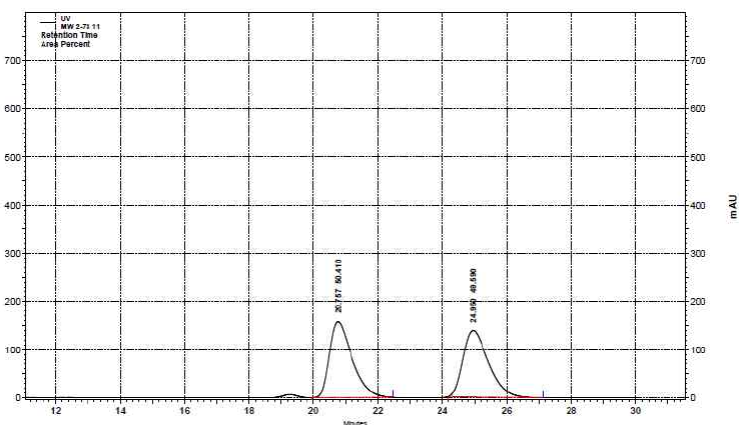

#### UV Results

| Name | Retention Time | Area     | Area Percent | Integration Codes |
|------|----------------|----------|--------------|-------------------|
| 1    | 20.757         | 30792063 | 50.410       | BI                |
| 2    | 24.950         | 30290609 | 49.590       | II                |

|        |  |          |         |  |
|--------|--|----------|---------|--|
| Totals |  | 61082672 | 100.000 |  |
|--------|--|----------|---------|--|

### Area Percent Report

Instrument Name: L-2000  
 Software Version: Version LaChrom 8908800-07  
 Acquisition Method: Diacel chiralcel OD-H, Hexane : 2-Propanol = 99.5 : 0.5,  
 $\lambda$  = 254nm, flow rate = 1mL/min

Sample ID: *chiral-15c*

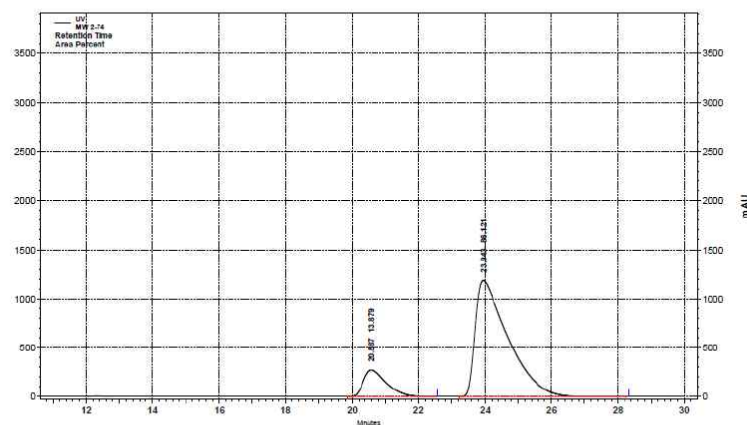

#### UV Results

| Name | Retention Time | Area      | Area Percent | Integration Codes |
|------|----------------|-----------|--------------|-------------------|
| 1    | 20.587         | 52407515  | 13.879       | II                |
| 2    | 23.943         | 325190306 | 86.121       | II                |

|        |  |           |         |  |
|--------|--|-----------|---------|--|
| Totals |  | 377597821 | 100.000 |  |
|--------|--|-----------|---------|--|

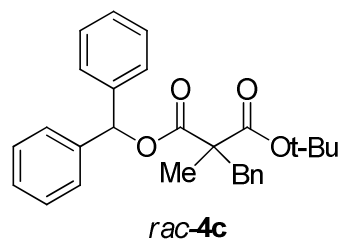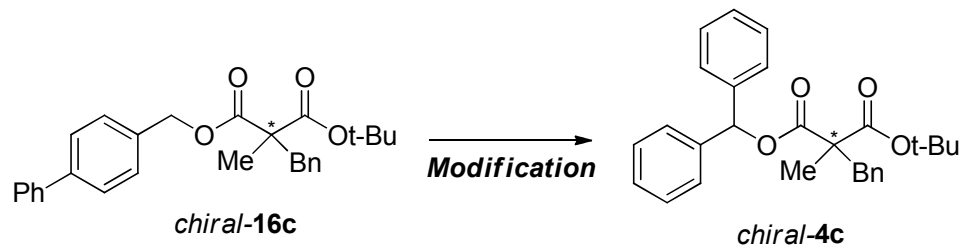

## Area Percent Report

Instrument Name: L-2000  
 Software Version: Version LaChrom 8908800-07  
 Acquisition Method: Diacel chiralpak AD-H, Hexane : 2-Propanol = 98 : 2,  
 $\lambda = 254\text{nm}$ , flow rate = 1mL/min

Sample ID: *rac-4c*

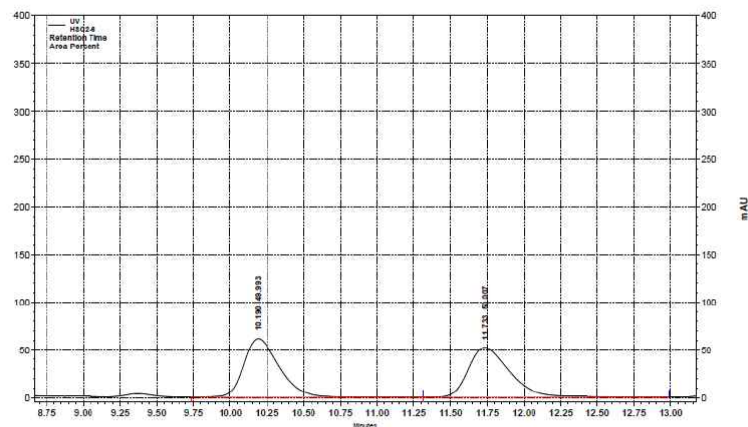

### UV Results

| Name | Retention Time | Area     | Area Percent | Integration Codes |
|------|----------------|----------|--------------|-------------------|
| 1    | 10.867         | 10415588 | 49.876       | IB                |
| 2    | 12.577         | 10467229 | 50.124       | BI                |

|        |  |          |         |  |
|--------|--|----------|---------|--|
| Totals |  | 20882817 | 100.000 |  |
|--------|--|----------|---------|--|

## Area Percent Report

Instrument Name: L-2000  
 Software Version: Version LaChrom 8908800-07  
 Acquisition Method: Diapak AD-H, Hexane : 2-Propanol = 98 : 2,  
 $\lambda = 254\text{nm}$ , flow rate = 1mL/min

Sample ID: *chiral-4c* (Modification of *chiral-16c*)

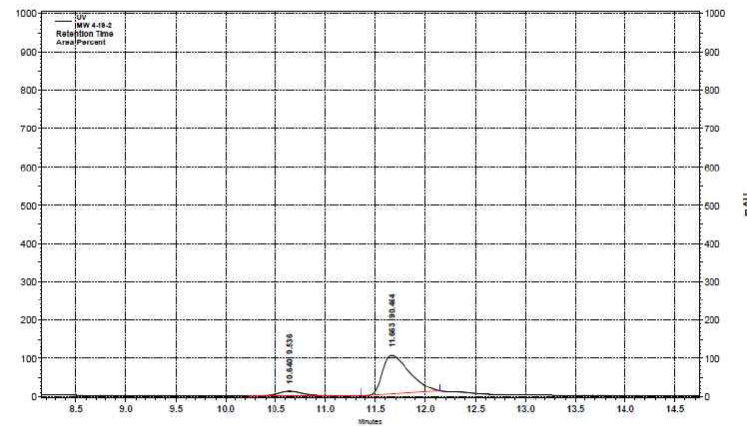

### UV Results

| Name | Retention Time | Area    | Area Percent | Integration Codes |
|------|----------------|---------|--------------|-------------------|
| 1    | 10.640         | 759562  | 9.078        | IB                |
| 2    | 11.663         | 7607273 | 90.922       | IB                |

|        |  |         |         |  |
|--------|--|---------|---------|--|
| Totals |  | 8366835 | 100.000 |  |
|--------|--|---------|---------|--|

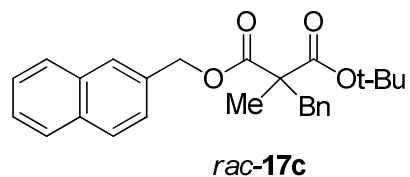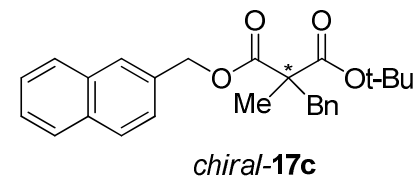

## Area Percent Report

Instrument Name: L-2000

Software Version: Version LaChrom 8908800-07

Acquisition Method: Diacel chiralcel OJ-H, Hexane : 2-Propanol = 95 : 5,

$\lambda$  = 254nm, flow rate = 1mL/min

Sample ID: *rac-17c*

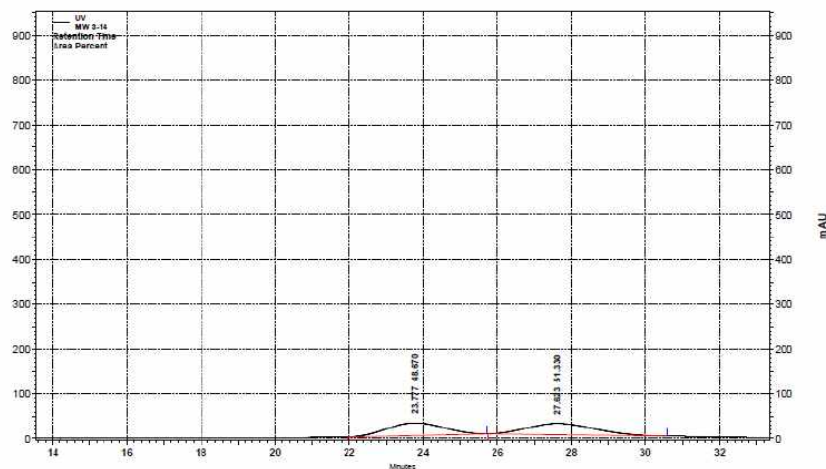

### UV Results

| Name | Retention Time | Area     | Area Percent | Integration Codes |
|------|----------------|----------|--------------|-------------------|
|      | 23.777         | 12312651 | 48.670       | mm                |
|      | 27.623         | 12985424 | 51.330       | mm                |

Totals

25298075 100.000

## Area Percent Report

Instrument Name: L-2000

Software Version: Version LaChrom 8908800-07

Acquisition Method: Diacel chiralcel OJ-H, Hexane : 2-Propanol = 95 : 5,

$\lambda$  = 254nm, flow rate = 1mL/min

Sample ID: *chiral-17c*

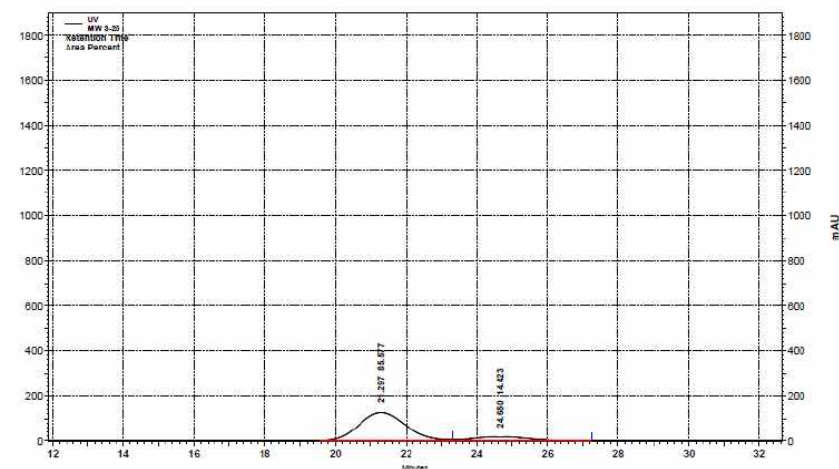

### UV Results

| Name | Retention Time | Area     | Area Percent | Integration Codes |
|------|----------------|----------|--------------|-------------------|
|      | 21.297         | 46165614 | 85.377       | IV                |
|      | 24.650         | 7780377  | 14.423       | VI                |

Totals

53945991 100.000



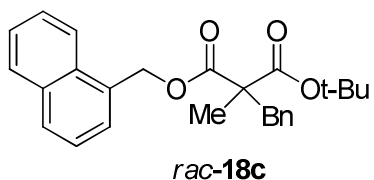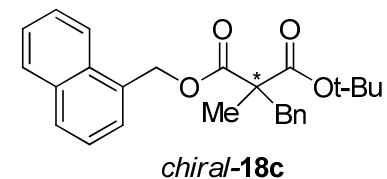

## Area Percent Report

Instrument Name: L-2000

Software Version: Version LaChrom 8908800-07

Acquisition Method: Diacel chiralcel OJ-H, Hexane : 2-Propanol = 80 : 20,

$\lambda = 254\text{nm}$ , flow rate = 1mL/min

Sample ID: **rac-18c**

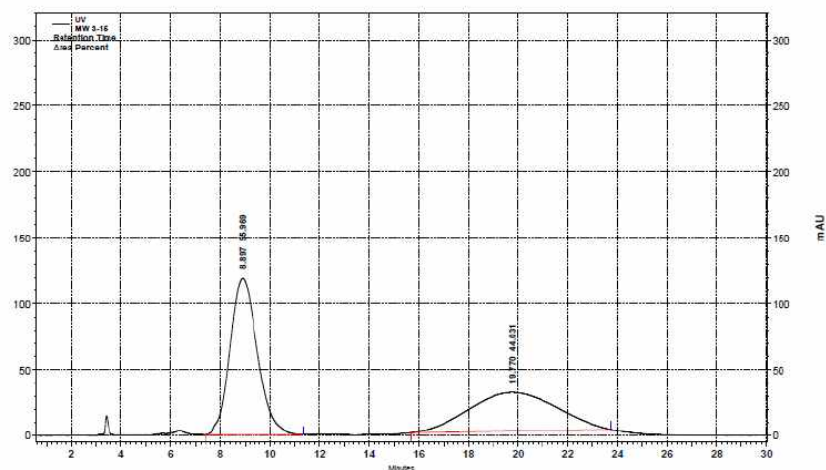

### UV Results

| Name | Retention Time | Area     | Area Percent | Integration Codes |
|------|----------------|----------|--------------|-------------------|
| 1    | 8.897          | 36407380 | 55.969       | BB                |
| 2    | 19.770         | 28641926 | 44.031       | mm                |

Totals

63049306 100.000

## Area Percent Report

Instrument Name: L-2000

Software Version: Version LaChrom 8908800-07

Acquisition Method: Diacel chiralcel OJ-H, Hexane : 2-Propanol = 80 : 20,

$\lambda = 254\text{nm}$ , flow rate = 1mL/min

Sample ID: **chiral-18c**

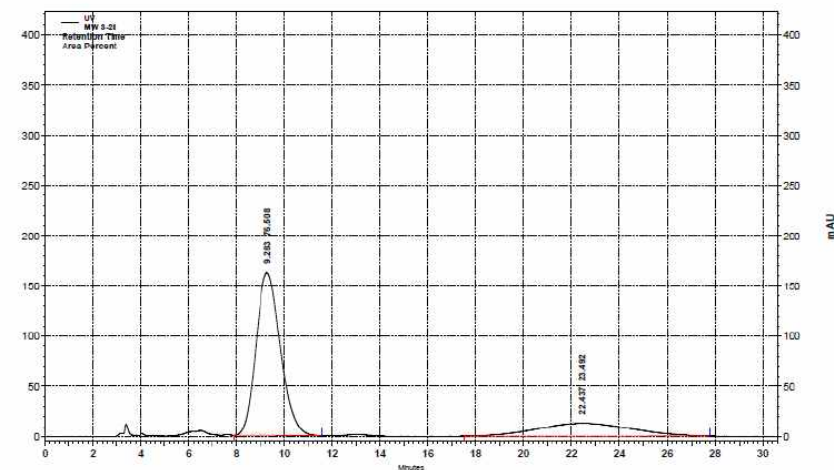

### UV Results

| Name | Retention Time | Area     | Area Percent | Integration Codes |
|------|----------------|----------|--------------|-------------------|
| 1    | 9.283          | 46046631 | 76.508       | BI                |
| 2    | 22.437         | 14138972 | 23.492       | mm                |

Totals

60185603 100.000

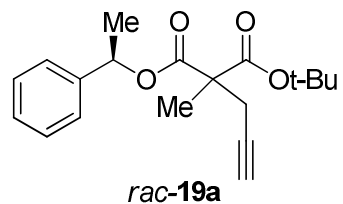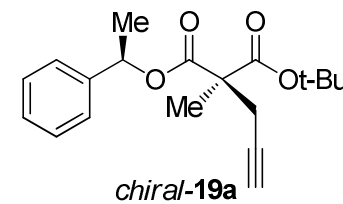

## Area Percent Report

Instrument Name: L-2000

Software Version: Version LaChrom 8908800-07

Acquisition Method: Diacel chiralcel OJ-H, Hexane : 2-Propanol = 99 : 1,

$\lambda = 210\text{nm}$ , flow rate = 1mL/min

Sample ID: **rac-19a**

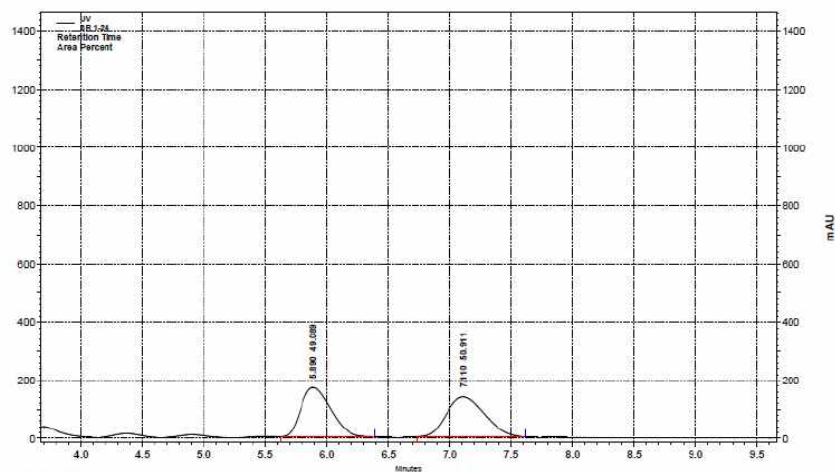

### UV Results

| Name | Retention Time | Area     | Area Percent | Integration Codes |
|------|----------------|----------|--------------|-------------------|
|      | 5.890          | 11435030 | 49.089       | mm                |
|      | 7.110          | 11859389 | 50.911       | mm                |

| Totals | Area     | Area Percent |
|--------|----------|--------------|
|        | 23294419 | 100.000      |

## Area Percent Report

Instrument Name: L-2000

Software Version: Version LaChrom 8908800-07

Acquisition Method: Diacel chiralcel OJ-H, Hexane : 2-Propanol = 99 : 1,

$\lambda = 210\text{nm}$ , flow rate = 1mL/min

Sample ID: **chiral-19a**

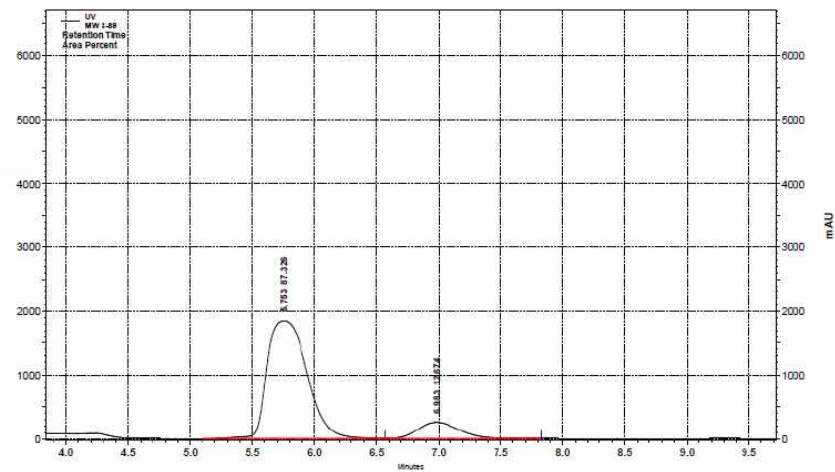

### UV Results

| Name | Retention Time | Area      | Area Percent | Integration Codes |
|------|----------------|-----------|--------------|-------------------|
|      | 5.753          | 164188170 | 87.326       | BV                |
|      | 6.983          | 23829377  | 12.674       | VI                |

| Totals | Area      | Area Percent |
|--------|-----------|--------------|
|        | 188017547 | 100.000      |

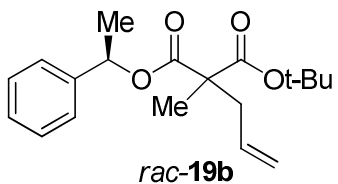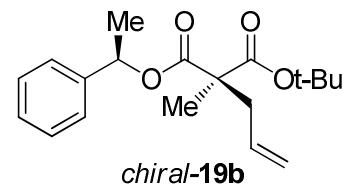

## Area Percent Report

Instrument Name: L-2000

Software Version: Version LaChrom 8908800-07

Acquisition Method: Diacel chiralcel OJ-H, Hexane : 2-Propanol = 99 : 1,

$\lambda = 210\text{nm}$ , flow rate = 1mL/min

Sample ID: *rac-19b*

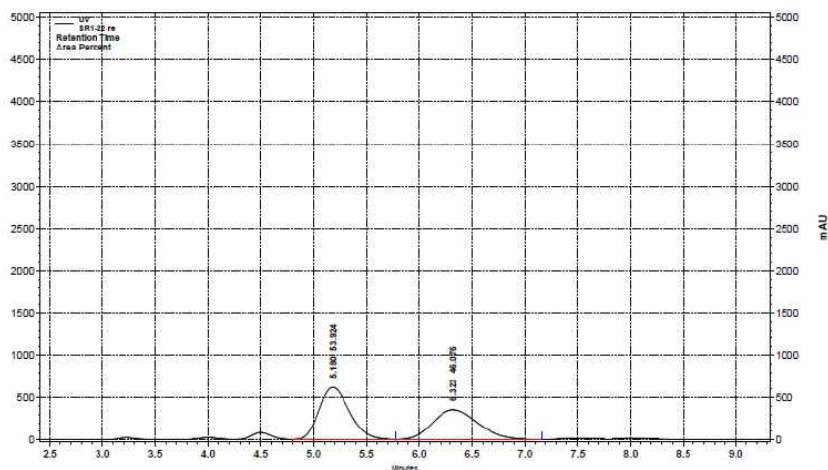

### UV Results

| Name | Retention Time | Area     | Area Percent | Integration Codes |
|------|----------------|----------|--------------|-------------------|
|      | 5.180          | 49517203 | 53.924       | mm                |
|      | 6.323          | 42310784 | 46.076       | mm                |

| Totals | Area     | Area Percent |
|--------|----------|--------------|
|        | 91827987 | 100.000      |

## Area Percent Report

Instrument Name: L-2000

Software Version: Version LaChrom 8908800-07

Acquisition Method: Diacel chiralcel OJ-H, Hexane : 2-Propanol = 99 : 1,

$\lambda = 210\text{nm}$ , flow rate = 1mL/min

Sample ID: *chiral-19b*

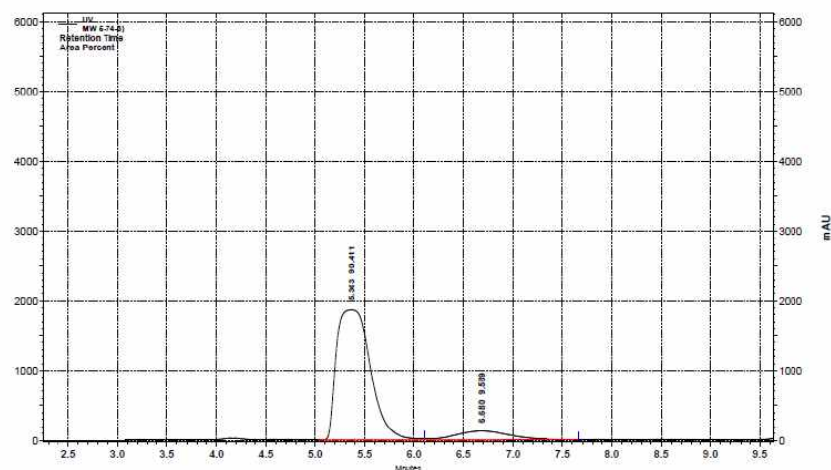

### UV Results

| Name | Retention Time | Area      | Area Percent | Integration Codes |
|------|----------------|-----------|--------------|-------------------|
| 1    | 5.363          | 179072241 | 90.411       | BV                |
| 2    | 6.680          | 18992371  | 9.589        | VB                |

| Totals | Area      | Area Percent |
|--------|-----------|--------------|
|        | 198064612 | 100.000      |

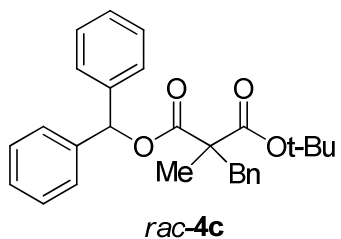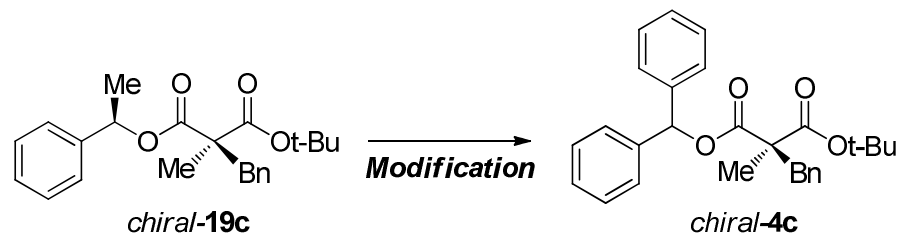

## Area Percent Report

Instrument Name: L-2000

Software Version: Version LaChrom 8908800-07

Acquisition Method: Diapak chiralpak AD-H, Hexane : 2-Propanol = 98 : 2,

$\lambda = 254\text{nm}$ , flow rate = 1mL/min

Sample ID: *rac-4c*

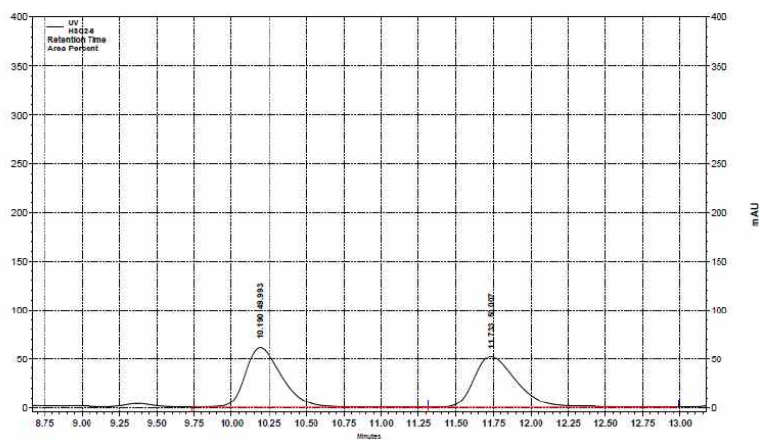

### UV Results

| Name | Retention Time | Area     | Area Percent | Integration Codes |
|------|----------------|----------|--------------|-------------------|
| 2    | 10.867         | 10415388 | 49.876       | IB                |
|      | 11.777         | 10467229 | 50.124       | BI                |

|        |  |          |         |  |
|--------|--|----------|---------|--|
| Totals |  | 20882817 | 100.000 |  |
|--------|--|----------|---------|--|

## Area Percent Report

Instrument Name: L-2000

Software Version: Version LaChrom 8908800-07

Acquisition Method: Diapak AD-H, Hexane : 2-Propanol = 98 : 2,

$\lambda = 254\text{nm}$ , flow rate = 1mL/min

Sample ID: *chiral-4c* (Modification of *chiral-19c*)

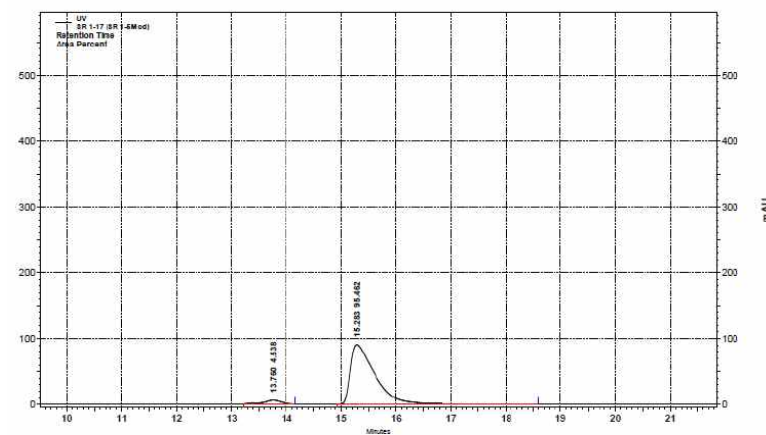

### UV Results

| Name | Retention Time | Area     | Area Percent | Integration Codes |
|------|----------------|----------|--------------|-------------------|
|      | 13.760         | 537094   | 4.538        | nm                |
|      | 15.283         | 11297513 | 95.462       | nm                |

|        |  |          |         |  |
|--------|--|----------|---------|--|
| Totals |  | 11834607 | 100.000 |  |
|--------|--|----------|---------|--|

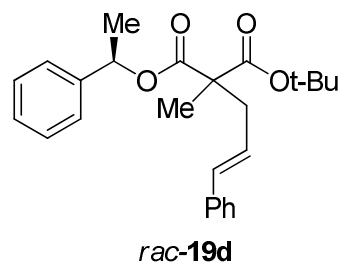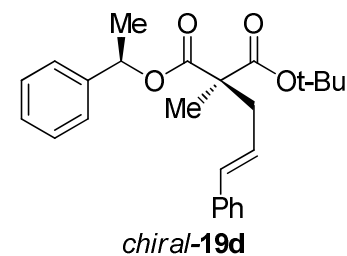

## Area Percent Report

Instrument Name: L-2000

Software Version: Version LaChrom 8908800-07

Acquisition Method: Diacel chiralcel OJ-H, Hexane : 2-Propanol = 99 : 1,

$\lambda = 210\text{nm}$ , flow rate = 1mL/min

Sample ID: **rac-19d**

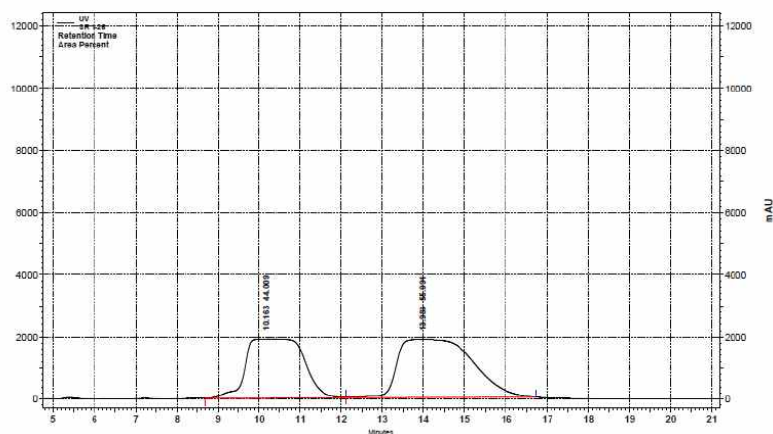

### UV Results

| Name | Retention Time | Area      | Area Percent | Integration Codes |
|------|----------------|-----------|--------------|-------------------|
| 2    | 10.163         | 738732571 | 44.009       | mm                |
|      | 13.983         | 939857505 | 55.991       | mm                |

| Totals |  | Area       | Area Percent |
|--------|--|------------|--------------|
|        |  | 1678590076 | 100.000      |

## Area Percent Report

Instrument Name: L-2000

Software Version: Version LaChrom 8908800-07

Acquisition Method: Diacel chiralcel OJ-H, Hexane : 2-Propanol = 99 : 1,

$\lambda = 210\text{nm}$ , flow rate = 1mL/min

Sample ID: **chiral-19d**

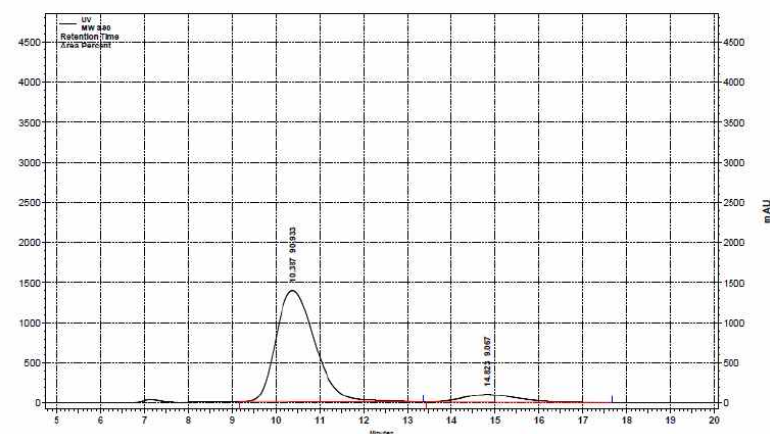

### UV Results

| Name | Retention Time | Area      | Area Percent | Integration Codes |
|------|----------------|-----------|--------------|-------------------|
| 2    | 10.387         | 342649151 | 90.933       | mm                |
|      | 14.823         | 34164954  | 9.067        | BB                |

| Totals |  | Area      | Area Percent |
|--------|--|-----------|--------------|
|        |  | 376814105 | 100.000      |

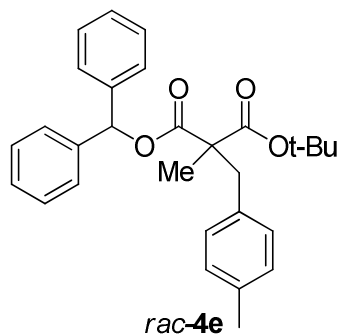

## Area Percent Report

Instrument Name: L-2000  
 Software Version: Version LaChrom 8908800-07  
 Acquisition Method: Diacel chiralpak AD-H, Hexane : 2-Propanol = 98 : 2,  
 $\lambda = 254\text{nm}$ , flow rate = 1mL/min

Sample ID: *rac-4e*

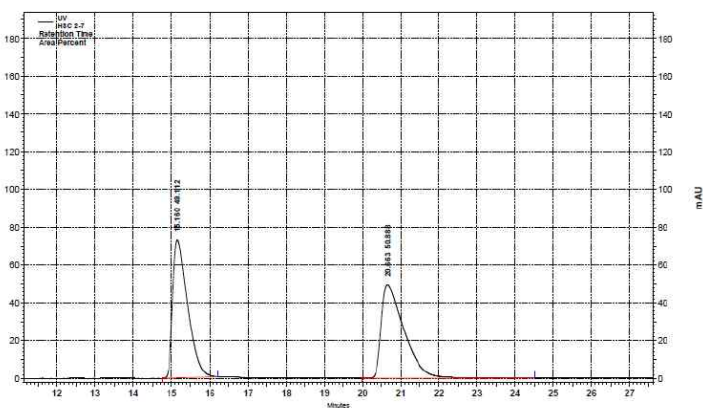

| UV Results |                |          |              |                   |
|------------|----------------|----------|--------------|-------------------|
| Name       | Retention Time | Area     | Area Percent | Integration Codes |
|            | 15.160         | 7875112  | 49.112       | BI                |
|            | 20.663         | 8159894  | 50.888       | BI                |
| Totals     |                | 16035006 | 100.000      |                   |

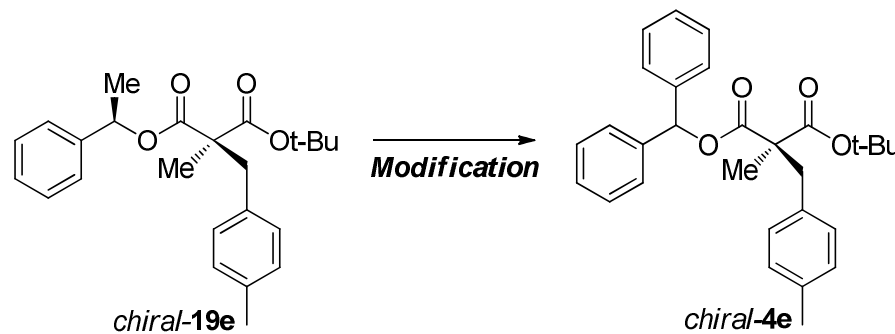

## Area Percent Report

Instrument Name: L-2000  
 Software Version: Version LaChrom 8908800-07  
 Acquisition Method: Diacel chiralpak AD-H, Hexane : 2-Propanol = 98 : 2,  
 $\lambda = 254\text{nm}$ , flow rate = 1mL/min

Sample ID: *chiral-4e* (Modification of *chiral-19e*)

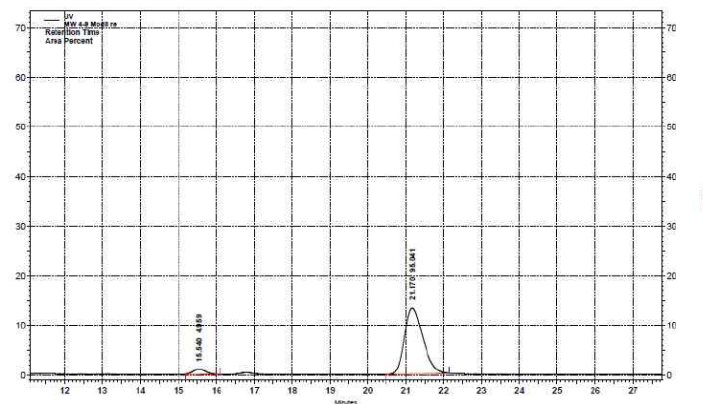

| UV Results |                |         |              |                   |
|------------|----------------|---------|--------------|-------------------|
| Name       | Retention Time | Area    | Area Percent | Integration Codes |
|            | 15.540         | 93204   | 4.959        | BI                |
| 2          | 21.170         | 1786140 | 95.041       | BI                |
| Totals     |                | 1879344 | 100.000      |                   |

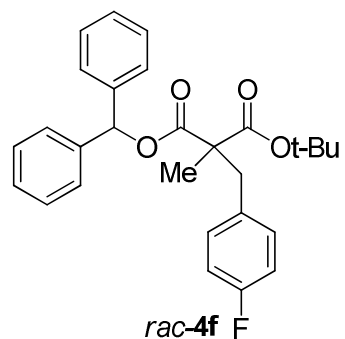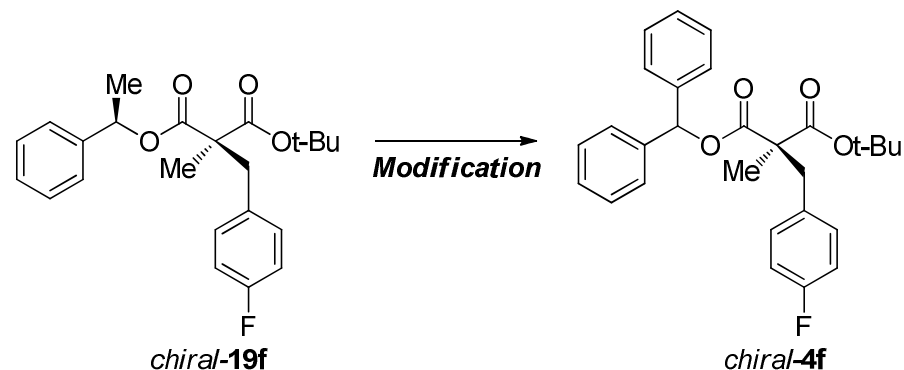

## Area Percent Report

Instrument Name: L-2000

Software Version: Version LaChrom 8908800-07

Acquisition Method: Diacel chiralpak AD-H, Hexane : 2-Propanol = 95 : 5,

$\lambda = 254\text{nm}$ , flow rate = 1mL/min

Sample ID: *rac-4f*

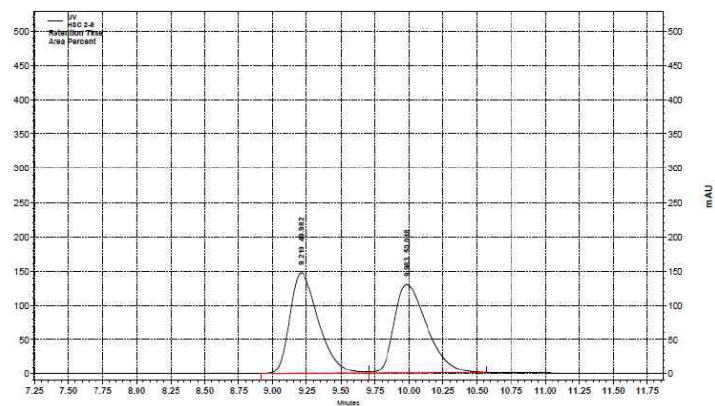

### UV Results

| Name | Retention Time | Area    | Area Percent | Integration Codes |
|------|----------------|---------|--------------|-------------------|
|      | 9.210          | 8609656 | 49.982       | BV                |
|      | 9.983          | 8615763 | 50.018       | VI                |

| Totals | Area     | Area Percent |
|--------|----------|--------------|
|        | 17225419 | 100.000      |

## Area Percent Report

Instrument Name: L-2000

Software Version: Version LaChrom 8908800-07

Acquisition Method: Diacel chiralpak AD-H, Hexane : 2-Propanol = 95 : 5,

$\lambda = 254\text{nm}$ , flow rate = 1mL/min

Sample ID: *chiral-4f* (Modification of *chiral-19f*)

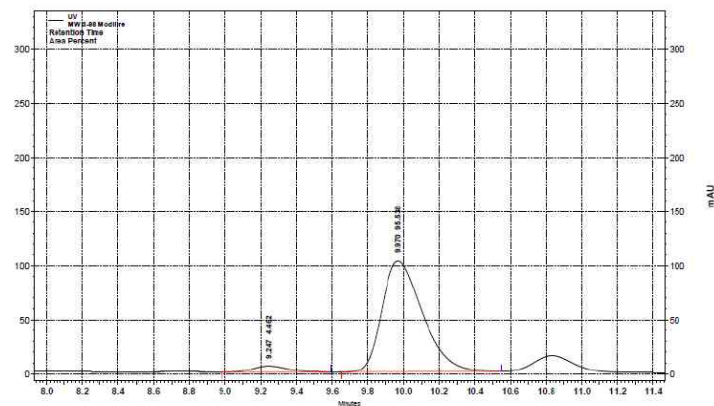

### UV Results

| Name | Retention Time | Area    | Area Percent | Integration Codes |
|------|----------------|---------|--------------|-------------------|
|      | 9.247          | 301195  | 4.462        | BB                |
|      | 9.970          | 6449021 | 95.538       | BB                |

| Totals | Area    | Area Percent |
|--------|---------|--------------|
|        | 6750216 | 100.000      |

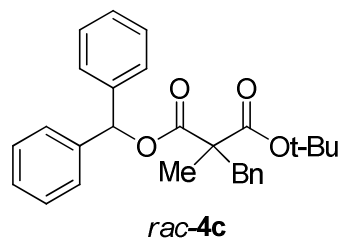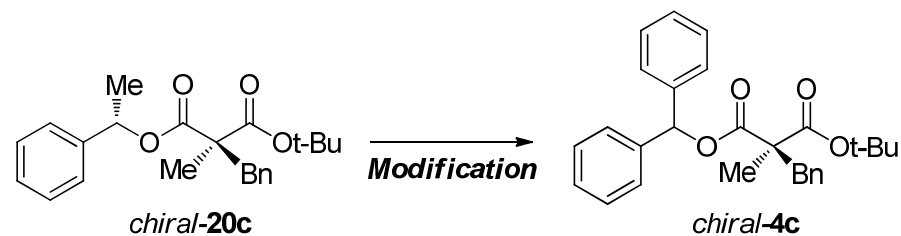

## Area Percent Report

Instrument Name: L-2000

Software Version: Version LaChrom 8908800-07

Acquisition Method: Diacel chiralpak AD-H, Hexane : 2-Propanol = 98 : 2,

$\lambda = 254\text{nm}$ , flow rate = 1mL/min

Sample ID: *rac-4c*

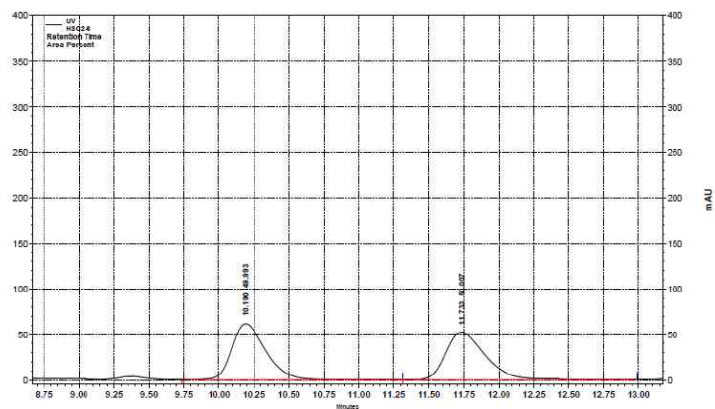

### UV Results

| Name | Retention Time | Area     | Area Percent | Integration Codes |
|------|----------------|----------|--------------|-------------------|
| 2    | 10.867         | 10415588 | 49.876       | IB                |
| 2    | 12.577         | 10467229 | 50.124       | BI                |

|        |  |          |         |  |
|--------|--|----------|---------|--|
| Totals |  | 20882817 | 100.000 |  |
|--------|--|----------|---------|--|

## Area Percent Report

Instrument Name: L-2000

Software Version: Version LaChrom 8908800-07

Acquisition Method: Diapak AD-H, Hexane : 2-Propanol = 98 : 2,

$\lambda = 254\text{nm}$ , flow rate = 1mL/min

Sample ID: *chiral-4c* (Modification of *chiral-20c*)

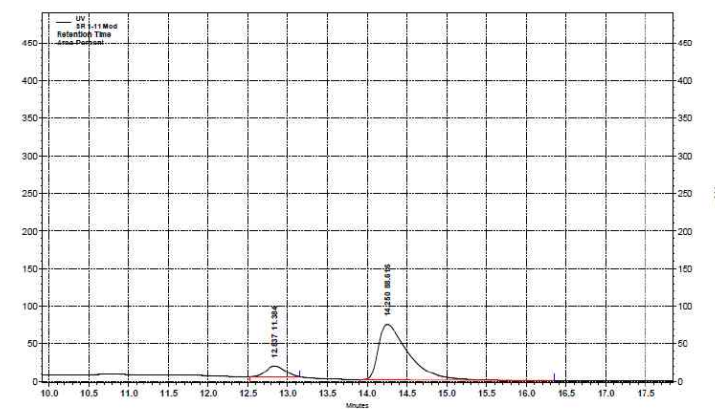

### UV Results

| Name | Retention Time | Area    | Area Percent | Integration Codes |
|------|----------------|---------|--------------|-------------------|
| 2    | 12.837         | 998414  | 11.384       | mm                |
| 2    | 14.250         | 7771971 | 88.616       | BI                |

|        |  |         |         |  |
|--------|--|---------|---------|--|
| Totals |  | 8770385 | 100.000 |  |
|--------|--|---------|---------|--|



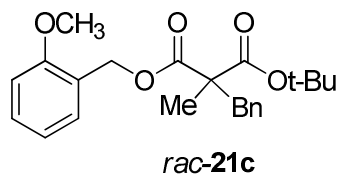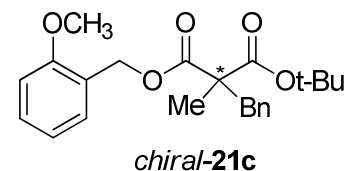

## Area Percent Report

Instrument Name: L-2000

Software Version: Version LaChrom 8908800-07

Acquisition Method: Diacel chiralpak AD-H, Hexane : 2-Propanol = 99 : 1,

$\lambda = 254\text{nm}$ , flow rate = 1mL/min

Sample ID: rac-21c

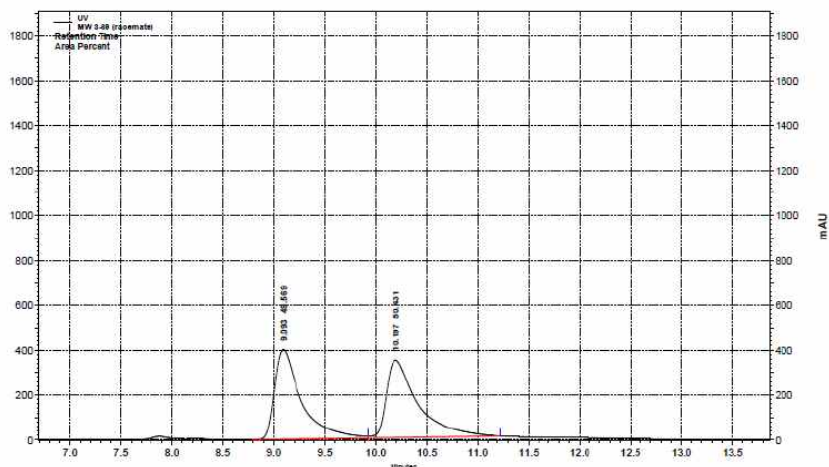

### UV Results

| Name | Retention Time | Area     | Area Percent | Integration Codes |
|------|----------------|----------|--------------|-------------------|
| 1    | 9.093          | 29185587 | 49.569       | mm                |
| 2    | 10.197         | 29693304 | 50.431       | mm                |

| Totals | Area     | Area Percent |
|--------|----------|--------------|
|        | 58878891 | 100.000      |

## Area Percent Report

Instrument Name: L-2000

Software Version: Version LaChrom 8908800-07

Acquisition Method: Diacel chiralpak AD-H, Hexane : 2-Propanol = 99 : 1,

$\lambda = 254\text{nm}$ , flow rate = 1mL/min

Sample ID: chiral-21c

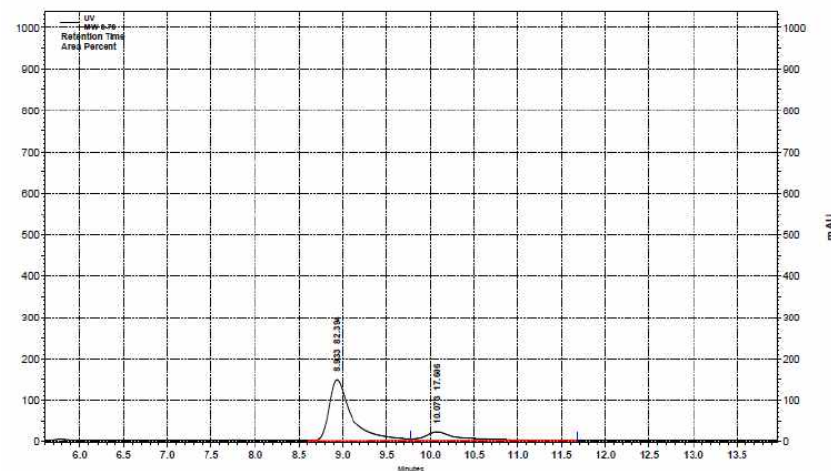

### UV Results

| Name | Retention Time | Area     | Area Percent | Integration Codes |
|------|----------------|----------|--------------|-------------------|
| 2    | 8.933          | 10504148 | 82.394       | BV                |
|      | 10.073         | 2244587  | 17.606       | VI                |

| Totals | Area     | Area Percent |
|--------|----------|--------------|
|        | 12748735 | 100.000      |

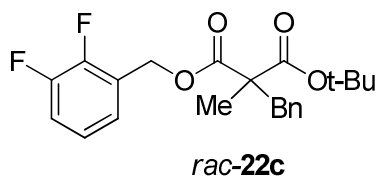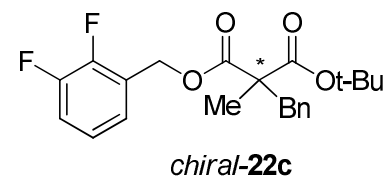

## Area Percent Report

Instrument Name: L-2000

Software Version: Version LaChrom 8908800-07

Acquisition Method: Diacel chiralcel OD-H, Hexane : 2-Propanol = 99 : 1,

$\lambda = 254\text{nm}$ , flow rate = 1mL/min

Sample ID: *rac-22c*

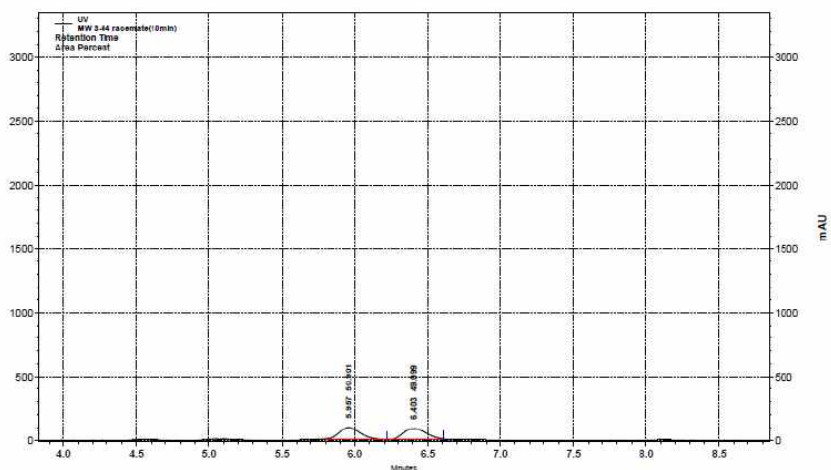

### UV Results

| Name | Retention Time | Area    | Area Percent | Integration Codes |
|------|----------------|---------|--------------|-------------------|
| 1    | 5.957          | 3445121 | 50.901       | mm                |
| 2    | 6.403          | 3323208 | 49.099       | mm                |

| Totals | Area    | Area Percent |
|--------|---------|--------------|
|        | 6768329 | 100.000      |

## Area Percent Report

Instrument Name: L-2000

Software Version: Version LaChrom 8908800-07

Acquisition Method: Diacel chiralcel OD-H, Hexane : 2-Propanol = 99 : 1,

$\lambda = 254\text{nm}$ , flow rate = 1mL/min

Sample ID: *chiral-22c*

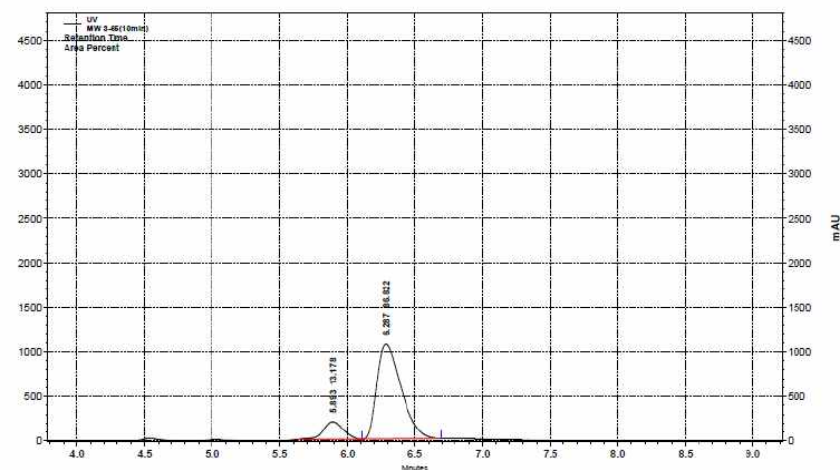

### UV Results

| Name | Retention Time | Area     | Area Percent | Integration Codes |
|------|----------------|----------|--------------|-------------------|
| 1    | 5.893          | 7957665  | 13.178       | mm                |
| 2    | 6.287          | 52430213 | 86.822       | mm                |

| Totals | Area     | Area Percent |
|--------|----------|--------------|
|        | 60387878 | 100.000      |

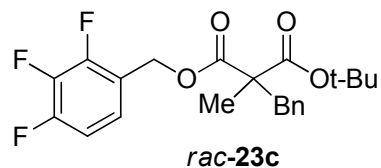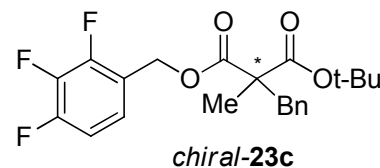

## Area Percent Report

Instrument Name: L-2000

Software Version: Version LaChrom 8908800-07

Acquisition Method: Diacel chiralcel OD-H, Hexane : 2-Propanol = 99 : 1,

$\lambda = 254\text{nm}$ , flow rate = 1mL/min

Sample ID: **rac-23c**

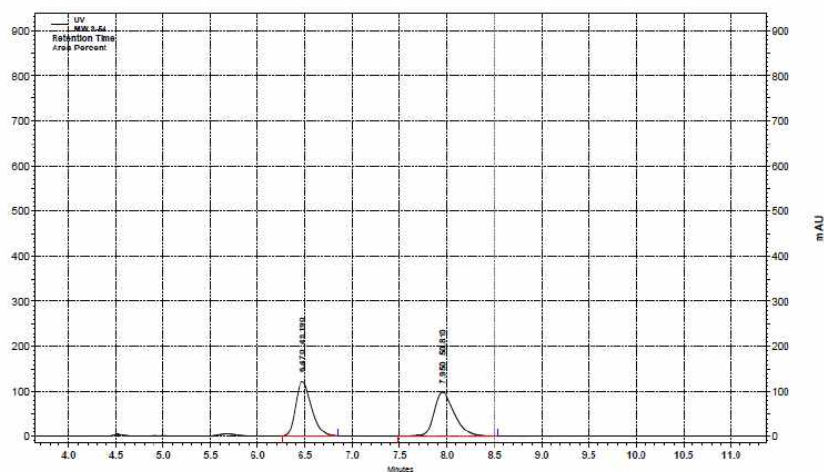

### UV Results

| Name | Retention Time | Area    | Area Percent | Integration Codes |
|------|----------------|---------|--------------|-------------------|
| 1    | 6.470          | 5833615 | 49.190       | II                |
|      | 7.950          | 6025810 | 50.810       | II                |

|        |  |          |         |  |
|--------|--|----------|---------|--|
| Totals |  | 11859425 | 100.000 |  |
|--------|--|----------|---------|--|

## Area Percent Report

Instrument Name: L-2000

Software Version: Version LaChrom 8908800-07

Acquisition Method: Diacel chiralcel OD-H, Hexane : 2-Propanol = 99 : 1,

$\lambda = 254\text{nm}$ , flow rate = 1mL/min

Sample ID: **chiral-23c**

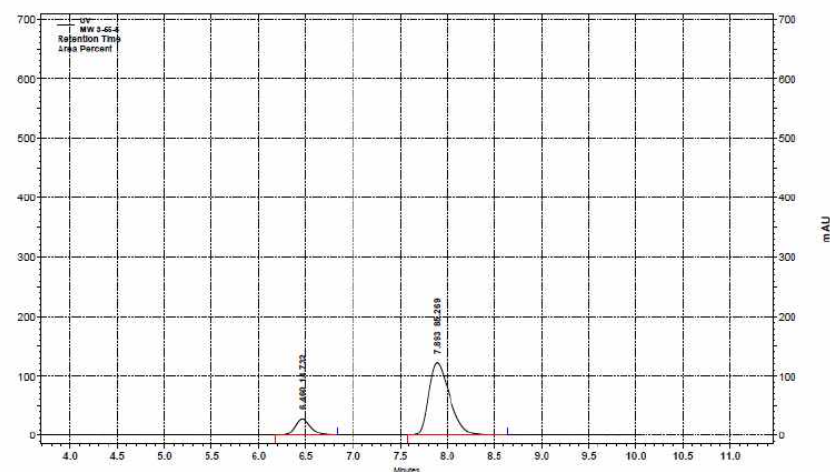

### UV Results

| Name | Retention Time | Area    | Area Percent | Integration Codes |
|------|----------------|---------|--------------|-------------------|
| 2    | 6.460          | 1303016 | 14.732       | II                |
|      | 7.893          | 7542084 | 85.269       | BI                |

|        |  |         |         |  |
|--------|--|---------|---------|--|
| Totals |  | 8845100 | 100.000 |  |
|--------|--|---------|---------|--|

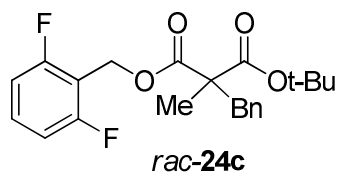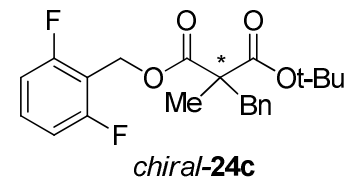

## Area Percent Report

Instrument Name: L-2000

Software Version: Version LaChrom 8908800-07

Acquisition Method: Diacel chiralcel OD-H, Hexane : 2-Propanol = 99 : 1,

$\lambda = 254\text{nm}$ , flow rate = 1mL/min

Sample ID: *rac-24c*

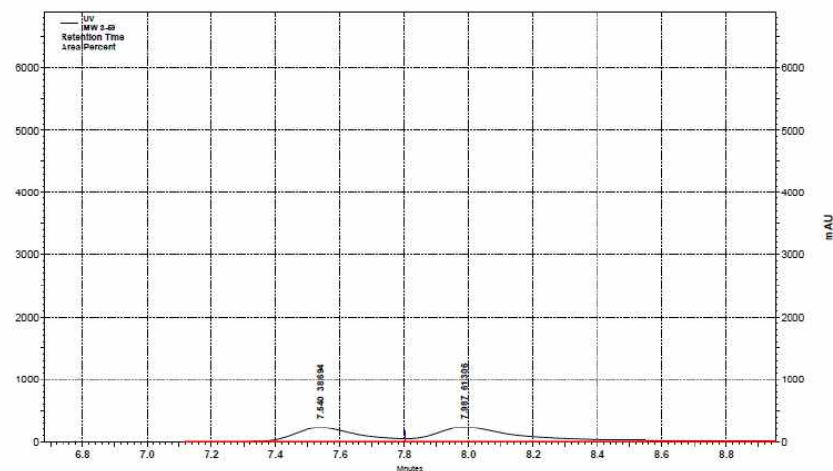

### UV Results

| Name | Retention Time | Area     | Area Percent | Integration Codes |
|------|----------------|----------|--------------|-------------------|
| 1    | 7.540          | 11997039 | 38.694       | BV                |
|      | 7.987          | 19007497 | 61.306       | VI                |

| Totals | Area     | Area Percent |
|--------|----------|--------------|
|        | 31004536 | 100.000      |

## Area Percent Report

Instrument Name: L-2000

Software Version: Version LaChrom 8908800-07

Acquisition Method: Diacel chiralcel OD-H, Hexane : 2-Propanol = 99 : 1,

$\lambda = 254\text{nm}$ , flow rate = 1mL/min

Sample ID: *chiral-24c*

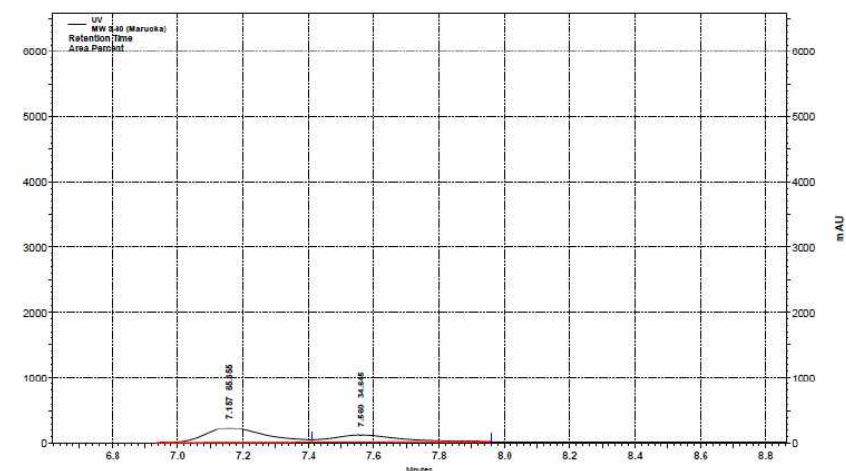

### UV Results

| Name | Retention Time | Area     | Area Percent | Integration Codes |
|------|----------------|----------|--------------|-------------------|
| 1    | 7.157          | 11324610 | 65.355       | BV                |
|      | 7.560          | 6003174  | 34.645       | VI                |

| Totals | Area     | Area Percent |
|--------|----------|--------------|
|        | 17327784 | 100.000      |
